# Supplementary material for: Asymmetric Synthesis of 1,3-Oxazolidine Derivatives with Multi-Component Reaction and Research of Kinetic Resolution
Source: PubMed Central journal article supplement (PMC6332461; doi:10.3390/molecules200917208), 2015-09-18
Supplement: molecules-20-17208-s001.pdf [file molecules-20-17208-s001.pdf]

# Supporting Information

## Table of Contents:

|                                                                                                          |         |
|----------------------------------------------------------------------------------------------------------|---------|
| 1. General.....                                                                                          | S1      |
| 2. Typical procedure for the asymmetric reaction of anilines, ethyl glyoxalate and racemic epoxides..... | S1      |
| 3. Characterization data of 1,3-oxazolidine derivatives.....                                             | S2–S6   |
| 4. <sup>1</sup> H- and <sup>13</sup> C-NMR spectra and HPLC analysis of products.....                    | S7–S50  |
| 5. HPLC analysis for epoxystyrene.....                                                                   | S50–S52 |
| 6. HMBC spectrum of product <b>3a</b> .....                                                              | S53     |
| 7. NOESY spectrum of product <b>3a</b> .....                                                             | S54     |

### 1. General

Unless otherwise noted, materials were used as commercial suppliers. All solvents were purified by standard method. Flash column chromatography was performed using 200–300 mesh silica gel.

Reaction progress was followed by TLC analysis at 254 nm. NMR spectroscopy was performed on 400 MHz spectrometer operating at 400 MHz (<sup>1</sup>H-NMR) and 100 MHz (<sup>13</sup>C-NMR). TMS was used as an internal standard and CDCl<sub>3</sub> was used as the solvent. <sup>1</sup>H-NMR data were reported as follows: chemical shifts in ppm downfield from tetramethylsilane, multiplicity (s = singlet, d = doublet, t = triplet, q = quartet, m = multiplet and br = broad), coupling constant = *J*. IR spectra were recorded by using KBr optics. All the reagents are used directly from commercial and without further purification.

### 2. Typical Procedure for the Asymmetric Reaction of Anilines, Ethyl Glyoxalate and Racemic Epoxides

Ti(O-*i*-Pr)<sub>4</sub> (0.05 mmol) and chiral binaphthalene ligand (**4c**, 0.10 mmol) were dissolved in 2.0 mL toluene, and the mixture was stirred for 2 h at room temperature, then aniline (1.1 mmol) and ethyl glyoxalate (1 mmol) were added into the mixture, and the result system was stirred for 30 mins. Finally epoxide (0.12 mmol) and TFA (0.5 mol %) were added into the system and were stirred at –40 °C for 4 days. Then the solvent was evaporated under vacuum. The residue was purified by silica gel column chromatography using 1:5 ethyl acetate/petroleum ether as eluent, giving a light yellow liquid. Enantiomeric excess (*ee*) were determined by HPLC analysis on a L-7420 (UV-VIS Detector with an L-7110 pump and a Chiralcel OD-H column).

### 3. Characterization Data of 1,3-oxazolidine Derivatives

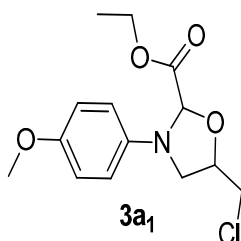

*Ethyl 5-(chloromethyl)-3-(4-methoxyphenyl)oxazolidine-2-carboxylate (3a<sub>1</sub>)*. Light yellow liquid;  $R_f = 0.46$  (1:5 ethyl acetate:petroleum ether); 48% yield (pure **3a<sub>1</sub>**). The enantiomeric excess (*ee*) was determined by HPLC on a Chiralcel OD-H column (*n*-hexane/isopropanol = 95/5, flow rate 0.5 mL/min,  $\lambda = 254$  nm),  $t_R = 8.92$  min (major),  $t_R = 10.397$  min (minor), 43% *ee*;  $^1\text{H-NMR}$  (400 MHz,  $\text{CDCl}_3$ )  $\delta$  6.82 (d,  $J = 6.8$  Hz, 2H), 6.69 (d,  $J = 6.8$  Hz, 2H), 5.42 (s, 1H), 4.58–4.55 (m, 1H), 4.18–4.16 (m, 2H), 3.84–3.80 (m, 1H), 3.78–3.72 (m, 5H), 3.56–3.52 (m, 1H), 1.23 (t,  $J = 7.2$  Hz, 3H).  $^{13}\text{C-NMR}$  (100 MHz,  $\text{CDCl}_3$ )  $\delta$  170.2, 153.9, 138.7, 116.0, 115.0, 89.7, 78.6, 61.6, 55.8, 51.5, 44.834, 14.2. HRMS ( $\text{EI}^+$ ) exact mass calculated for  $\text{C}_{14}\text{H}_{18}\text{ClNO}_4$   $[\text{M}]^+$  requires  $m/z$  299.0924, found  $m/z$  299.0937.

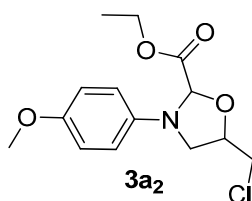

*Ethyl 5-(chloromethyl)-3-(4-methoxyphenyl)oxazolidine-2-carboxylate (3a<sub>2</sub>)*. Light yellow liquid;  $R_f = 0.36$  (1:5 ethyl acetate:petroleum ether); 4% yield (pure **3a<sub>2</sub>**).  $^1\text{H-NMR}$  (400 MHz,  $\text{CDCl}_3$ )  $\delta$  6.84 (d,  $J = 6.8$  Hz, 2H), 6.67 (d,  $J = 6.8$  Hz, 2H), 5.46 (s, 1H), 4.92–4.88 (m, 1H), 4.22–4.16 (m, 2H), 3.78–3.69 (m, 5H), 3.65–3.60 (m, 1H), 3.43–3.39 (m, 1H), 1.25 (t,  $J = 7.2$  Hz, 3H).  $^{13}\text{C-NMR}$  (100 MHz,  $\text{CDCl}_3$ )  $\delta$  169.3, 152.6, 138.3, 114.5, 114.0, 88.3, 77.6, 60.9, 55.2, 49.6, 44.3, 13.7. HRMS ( $\text{EI}^+$ ) exact mass calculated for  $\text{C}_{14}\text{H}_{18}\text{ClNO}_4$   $[\text{M}]^+$  requires  $m/z$  299.0924, found  $m/z$  299.0937.

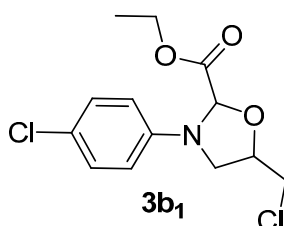

*Ethyl 5-(chloromethyl)-3-(4-chlorophenyl)oxazolidine-2-carboxylate (3b<sub>1</sub>)*. Light yellow liquid;  $R_f = 0.57$  (1:5 ethyl acetate:petroleum ether); 46% yield (pure **3b<sub>1</sub>**). The enantiomeric excess (*ee*) was determined by HPLC on a Chiralcel OD-H column (*n*-hexane/isopropanol = 95/5, flow rate 1 mL/min,  $\lambda = 254$  nm),  $t_R = 12.13$  min (major),  $t_R = 8.09$  min (minor), 61.1% *ee* (minor);  $^1\text{H-NMR}$  (400 MHz,  $\text{CDCl}_3$ )  $\delta$  7.19 (d,  $J = 6.8$  Hz, 2H), 6.59 (d,  $J = 6.8$  Hz, 2H), 5.45 (s, 1H), 4.63–4.59 (m, 1H), 4.19–4.17 (m, 2H), 3.83–3.79 (m, 2H), 3.76–3.71 (m, 1H), 3.56–3.52 (m, 1H), 1.24 (t,  $J = 7.2$  Hz, 3H).  $^{13}\text{C-NMR}$  (100 MHz,  $\text{CDCl}_3$ )  $\delta$  169.8, 142.695, 129.4, 124.5, 115.0, 88.5, 78.8, 61.9, 50.5, 44.7, 14.2. HRMS ( $\text{EI}^+$ ) exact mass calculated for  $\text{C}_{13}\text{H}_{15}\text{Cl}_2\text{NO}_3$   $[\text{M}]^+$  requires  $m/z$  303.0429, found  $m/z$  303.0424.

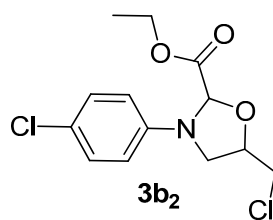

*Ethyl 5-(chloromethyl)-3-(4-chlorophenyl)oxazolidine-2-carboxylate (3b<sub>2</sub>)*. Light yellow liquid;  $R_f = 0.46$  (1:5 ethyl acetate:petroleum ether); 4% yield (pure **3b<sub>2</sub>**).  $^1\text{H-NMR}$  (400 MHz,  $\text{CDCl}_3$ )  $\delta$  7.21 (d,  $J = 6.8$  Hz, 2H), 6.62 (d,  $J = 6.8$  Hz, 2H), 5.48 (s, 1H), 4.97–4.94 (m, 1H), 4.23–4.21 (m, 2H), 3.79–3.72 (m, 2H), 3.68–3.64 (m, 1H), 3.45–3.42 (m, 1H), 1.28 (t,  $J = 7.2$  Hz, 3H).  $^{13}\text{C-NMR}$  (100 MHz,  $\text{CDCl}_3$ )  $\delta$  170.8, 144.2, 130.7, 125.3, 115.6, 89.4, 79.3, 63.1, 50.9, 45.8, 15.5. HRMS ( $\text{EI}^+$ ) exact mass calculated for  $\text{C}_{13}\text{H}_{15}\text{Cl}_2\text{NO}_3$   $[\text{M}]^+$  requires  $m/z$  303.0429, found  $m/z$  303.0424.

*Ethyl 5-(chloromethyl)-3-(4-ethoxyphenyl)oxazolidine-2-carboxylate (3c<sub>1</sub>)*

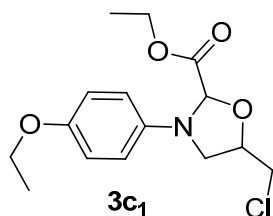

Light yellow liquid;  $R_f = 0.48$  (1:5 ethyl acetate:petroleum ether); 47% yield (**3c<sub>1</sub>**). The enantiomeric excess ( $ee$ ) was determined by HPLC on a Chiralcel OD-H column ( $n$ -hexane/isopropanol = 95/5, flow rate 0.5 mL / min,  $\lambda = 254$  nm),  $t_R = 7.79$  min (major),  $t_R = 8.57$  min (minor), 39%  $ee$ ;  $^1\text{H-NMR}$  (400 MHz,  $\text{CDCl}_3$ )  $\delta$  6.83 (d,  $J = 6.8$  Hz, 2H), 6.65 (d,  $J = 6.8$  Hz, 2H), 5.45 (s, 1H), 4.93–4.87 (m, 1H), 4.20–4.16 (m, 2H), 4.00–3.94 (m, 2H), 3.79–3.69 (m, 2H), 3.64–3.61 (m, 1H), 3.43–3.39 (m, 1H), 1.38 (t,  $J = 7.2$  Hz, 3H), 1.24 (t,  $J = 7.2$  Hz, 3H).  $^{13}\text{C-NMR}$  (100 MHz,  $\text{CDCl}_3$ )  $\delta$  169.9, 152.5, 138.8, 115.9, 114.6, 88.9, 78.1, 64.2, 61.5, 50.2, 44.7, 15.1, 14.3. HRMS ( $\text{EI}^+$ ) exact mass calculated for  $\text{C}_{15}\text{H}_{20}\text{ClNO}_4$   $[\text{M} + \text{H}]^+$  requires  $m/z$  314.1154, found  $m/z$  314.1155.

Above products of **3a**, **3b** and **3c** as pure chiral compounds could be successfully separated as single isomers, but below products **3d**, **3e**, **3f**, **3g**, **3h**, **3i**, **3j** couldn't be separated as single isomers from their stereoisomers.

*Ethyl 5-(isopropoxymethyl)-3-(4-methoxyphenyl)oxazolidine-2-carboxylate (3d)* (diastereoisomers)

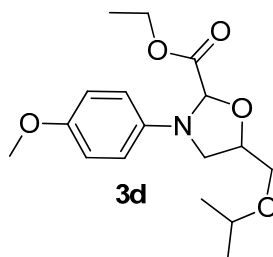

Light yellow liquid;  $R_f = 0.33$  (1:5 ethyl acetate:petroleum ether); 56% yield. The enantiomeric excess ( $ee$ ) was determined by HPLC on a Chiralcel OD-H column ( $n$ -hexane/isopropanol = 95/5, flow

rate 0.5 mL/min,  $\lambda = 254$  nm),  $t_R = 18.40$  min (major),  $t_R = 19.12$  min (minor), 41.5% *ee* (minor);  $^1\text{H-NMR}$  (400 MHz,  $\text{CDCl}_3$ )  $\delta$  6.85–6.81 (m, 2H[2H']), 6.66–6.63 (m, 2H[2H']), 5.39 (s, 1H) and 5.42, (s, 1H'), 4.84–4.80 (m, 1H[1H']), 4.21–4.13 (m, 2H[2H']), 3.75 (s, 3H), 3.68–3.60 (m, 2H), 3.59–3.55 (m, 2H), 3.43–3.25 (m, 1H[1H']), 1.25 (t,  $J = 7.2$  Hz, 3H), 1.21–1.15 (m, 6H).  $^{13}\text{C-NMR}$  (100 MHz,  $\text{CDCl}_3$ )  $\delta$  170.2 153.0, 139.3 115.0 and [115.4, (1C')], 114.3 88.7 and [88.8, (1C')], 78.0, 72.5, 69. and [69.8 (1C')], 61.3, 55.8, 49.6 and [49.8, (1C')], 22.1, 14.2 HRMS ( $\text{EI}^+$ ) exact mass calculated for  $\text{C}_{17}\text{H}_{25}\text{NO}_5$   $[\text{M}]^+$  requires  $m/z$  323.1733, found  $m/z$  323.1743.

*Ethyl 5-(butoxymethyl)-3-(4-methoxyphenyl)oxazolidine-2-carboxylate (3e)* (diastereoisomers)

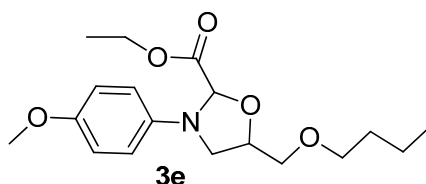

Light yellow liquid;  $R_f = 0.44$  (1:5 ethyl acetate:petroleum ether); 46% yield. The enantiomeric excess (*ee*) was determined by HPLC on a Chiralcel OD-H column (*n*-hexane/isopropanol = 95/5, flow rate 0.5 mL/min,  $\lambda = 254$  nm),  $t_R = 19.49$  min (major),  $t_R = 22.00$  min (minor), 71% *ee*;  $^1\text{H-NMR}$  (400 MHz,  $\text{CDCl}_3$ )  $\delta$  6.876.83(m, 2H[2H']), 6.68–6.66 (m, 2H[2H']), 5.41 (s, 1H) and 5.44 (s, 1H'), 4.874.50 (m, 1H[1H']), 4.224.15 (m, 2H[2H']), 3.77 (s, 3H), 3.68–3.62 (m, 2H[2H']), 3.543.50 (m, 2H[2H']), 3.43–3.27 (m, 2H[2H']), 1.68–1.57 (m, 4H), 1.42–1.35 (m, 3H), 1.29–1.21 (m, 3H[3H']).  $^{13}\text{C-NMR}$  (100 MHz,  $\text{CDCl}_3$ )  $\delta$  169.7, 152.3, 138.9, 114.4 and [115.0, (1C')], 113.8, 88.1 (1C) and [88.6, (1C')], 77.2, 70.9, 60.7, 55.2, 50.4 and [49.8, (1C')], 48.9, 43.780, 31.3, 18.7, 13.4. HRMS ( $\text{EI}^+$ ) exact mass calculated for  $\text{C}_{18}\text{H}_{27}\text{NO}_5$   $[\text{M}]^+$  requires  $m/z$  337.1889, found  $m/z$  337.1886.

*Ethyl 5-(butoxymethyl)-3-(4-ethoxyphenyl)oxazolidine-2-carboxylate (3f)* (diastereoisomers)

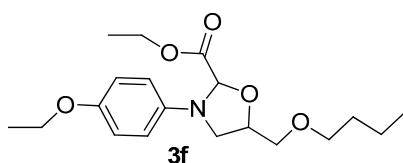

Light yellow liquid;  $R_f = 0.43$  (1:5 ethyl acetate:petroleum ether); 53% yield. The enantiomeric excess (*ee*) was determined by HPLC on a Chiralcel OD-H column (*n*-hexane/isopropanol = 95/5, flow rate 1 mL/min,  $\lambda = 254$  nm),  $t_R = 7.94$  min (major),  $t_R = 8.47$  min (minor), 34.5% *ee* (minor);  $^1\text{H-NMR}$  (400 MHz,  $\text{CDCl}_3$ )  $\delta$  6.84–6.80 (m, 2H[2H']), 6.64–6.61 (m, 2H[2H']), 5.38 (s, 1H) and [5.41, (s, 1H')], 4.84–4.45 (m, 1H[1H']), 4.21–4.16 (m, 2H[2H']), 3.99–3.93 (m, 2H), 3.68–3.60 (m, 2H[2H']), 3.51–3.47 (m, 2H), 3.40–3.25 (m, 2H[2H']), 1.59–1.54 (m, 4H), 1.40–1.33 (m, 6H), 1.27–1.1837 (m, 3H[3H']).  $^{13}\text{C-NMR}$  (100 MHz,  $\text{CDCl}_3$ )  $\delta$  170.37, 152.2, 139.4, 115.8, 114.2, 88.7 and [88.7, (1C')], 77.8, 71.5, 64.13, 61.3, 51.0 and [50.4, (1C')], 49.4, 44.4, 31.7, 19.3, 15.0, 14.0. HRMS ( $\text{ESI}^+$ ) exact mass calculated for  $[\text{M} + \text{Na}]^+$  requires  $m/z$  374.1944, found  $m/z$  374.1935.

*Ethyl 3-(4-ethoxyphenyl)-5-(isopropoxymethyl)oxazolidine-2-carboxylate (3g)* (diastereoisomers)

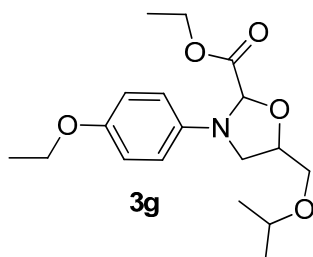

Light yellow liquid;  $R_f = 0.43$  (1:5 ethyl acetate:petroleum ether); 53% yield. The enantiomeric excess ( $ee$ ) was determined by HPLC on a Chiralcel OD-H column ( $n$ -hexane/isopropanol = 95/5, flow rate 1 mL/min,  $\lambda = 254$  nm),  $t_R = 6.59$  min (major),  $t_R = 7.90$  min (minor), 72%  $dr$ ;  $^1\text{H-NMR}$  (400 MHz,  $\text{CDCl}_3$ )  $\delta$  6.85–6.81 (m, 2H[2H']), 6.66–6.62 (m, 2H[2H']), 5.40 (s, 1H) and [5.42, (s, 1H)], 4.82–4.81 (m, 1H[1H']), 4.22–4.14 (m, 2H[2H']), 4.00–3.94 (m, 2H[2H']), 3.69–3.65 (m, 2H[2H']), 3.64–3.55 (m, 2H[2H']), 3.29–3.26 (m, 1H[1H']), 1.38 (t,  $J = 7.2$  Hz, 3H), 1.27–1.23 (m, 3H), 1.20–1.16 (m, 6H).  $^{13}\text{C-NMR}$  (100 MHz,  $\text{CDCl}_3$ )  $\delta$  169.8, 151.6, 138.9, 115.3, 113.7, 88.1 and [88.2, (1C')], 77.4, 71.9, 68.4 and [69.2, (1C')], 63.6, 60.7, 49.0 and [50.0, (1C')], 21.5, 14.5, 13.6. HRMS ( $\text{EI}^+$ ) exact mass calculated for  $\text{C}_{18}\text{H}_{27}\text{NO}_5$   $[\text{M}]^+$  requires  $m/z$  337.1889, found  $m/z$  337.1881.

*Ethyl 5-(butoxymethyl)-3-(4-chlorophenyl)oxazolidine-2-carboxylate (3h)* (diastereoisomers)

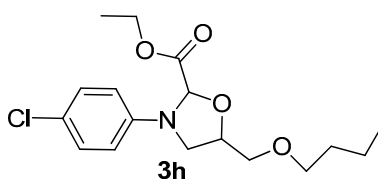

Light yellow liquid;  $R_f = 0.57$  (1:5 ethyl acetate:petroleum ether); 48% yield. The enantiomeric excess ( $ee$ ) was determined by HPLC on a Chiralcel OD-H column ( $n$ -hexane / isopropanol = 95/5, flow rate 1 mL/min,  $\lambda = 254$  nm),  $t_R = 4.74$  min (major),  $t_R = 6.18$  min (minor), 69.4%  $ee$  (major);  $^1\text{H-NMR}$  (400 MHz,  $\text{CDCl}_3$ )  $\delta$  7.20–7.17 (m, 2H[2H']), 6.59–6.54 (m, 2H[2H']), 5.40 (s, 1H) and [5.44, (s, 1H)], 4.87–4.53 (m, 1H[1H']), 4.23–4.15 (m, 2H[2H']), 3.67–3.61 (m, 2H[2H']), 3.52–3.47 (m, 2H), 3.41–3.28 (m, 2H[2H']), 1.60–1.53 (m, 4H), 1.40–1.31 (m, 3H), 1.28–1.20 (m, 3H[3H']).  $^{13}\text{C-NMR}$  (100 MHz,  $\text{CDCl}_3$ )  $\delta$  169.8, 143.3, 129.2, 123.5 and [123.9, (1C')], 114.1 and [114.7, (1C')], 87.1 and [88.0, (1C')], 77.8, 71.8, 71.2, 61.6, 48.8 and [49.5, (1C')], 31.7, 19.3, 14.2, 14.0. HRMS ( $\text{EI}^+$ ) exact mass calculated for  $\text{C}_{17}\text{H}_{24}\text{ClNO}_4$   $[\text{M}]^+$  requires  $m/z$  341.1394, found  $m/z$  341.1397.

*Ethyl 3-(4-chlorophenyl)-5-(isopropoxymethyl)oxazolidine-2-carboxylate (3i)* (diastereoisomers)

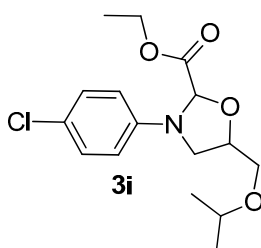

Light yellow liquid;  $R_f = 0.52$  (1:5 ethyl acetate:petroleum ether); 54% yield. The enantiomeric excess (*ee*) was determined by HPLC on a Chiralcel OD-H column (*n*-hexane/isopropanol = 95/5, flow rate 1 mL/min,  $\lambda = 254$  nm),  $t_R = 6.73$  min (major),  $t_R = 7.82$  min (minor), 90% *ee*;  $^1\text{H-NMR}$  (400 MHz,  $\text{CDCl}_3$ )  $\delta$  7.20–7.17 (m, 2H[2H']), 6.59–6.54 (m, 2H[2H']), 5.40 (s, 1H) and [5.43, (s, 1H')], 4.86–4.82 (m, 1H[1H']), 4.22–4.15 (m, 2H[2H']), 3.75–3.64 (m, 2H[2H']), 3.63–3.57 (m, 2H[2H']), 3.31–3.27 (m, 1H[1H']), 1.31–1.24 (m, 3H[3H']), 1.22–1.16 (m, 6H[6H']),  $^{13}\text{C-NMR}$  (100 MHz,  $\text{CDCl}_3$ )  $\delta$  169.8, 143.4, 129.2, 123.5, 114.1 and [114.7, (1C')], 87.9 and [88.0, (1C')], 78.0, 72.6, 68.7 and [69.6, (1C')], 61.6, 49.0 and [49.7, (1C')], 22.1, 14.2. HRMS (ESI<sup>+</sup>) exact mass calculated for  $[\text{M}+\text{Na}]^+$  requires  $m/z$  350.1130, found  $m/z$  350.1131.

Ethyl 3-(4-methoxyphenyl)-5-phenyloxazolidine-2-carboxylate (**3j**) (diastereoisomers):

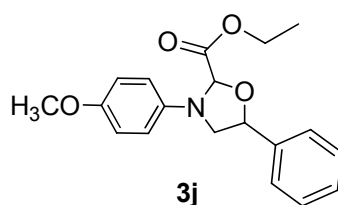

Light yellow solid; M.P: 53–56 °C;  $R_f = 0.50$  (1:5 ethyl acetate:petroleum ether); 42% yield. The enantiomeric excess (*ee*) was determined by HPLC on a Chiralcel OD-H column (*n*-hexane/isopropanol = 99/1, flow rate 0.30 mL/min,  $\lambda = 254$  nm),  $t_R = 28.61$  min (major),  $t_R = 30.667$  min (minor), 84.6% *ee*;  $^1\text{H-NMR}$  (400 MHz,  $\text{CDCl}_3$ )  $\delta$  7.50–7.48 (d, 2H), 7.33–7.32 (m, 3H), 6.79–6.73 (m, 2H), 6.71–6.66 (m, 2H), 5.50 (s, 1H) 4.36–4.27 (m, 2H), 4.24–4.16 (m, 2H), 4.05–4.02 (m, 1H), 3.72 (s, 3H) 1.40–1.37 (m, 3H),  $^{13}\text{C-NMR}$  (100 MHz,  $\text{CDCl}_3$ )  $\delta$  170.70, 153.06, 139.84, 139.19, 128.91, 127.83, 126.52, 114.88, 114.65, 90.85, 75.37, 63.75, 61.53, 55.59, 14.21. HRMS (EI<sup>+</sup>) exact mass calculated for  $\text{C}_{19}\text{H}_{21}\text{NO}_4$   $[\text{M}]^+$  requires  $m/z$  327.1471, found  $m/z$  327.1471.

NOESY experiment and HMBC experiment also identified the structure of products, see the spectra in Supporting Information.

4.  $^1\text{H-NMR}$  and  $^{13}\text{C-NMR}$  Spectra and HPLC of Products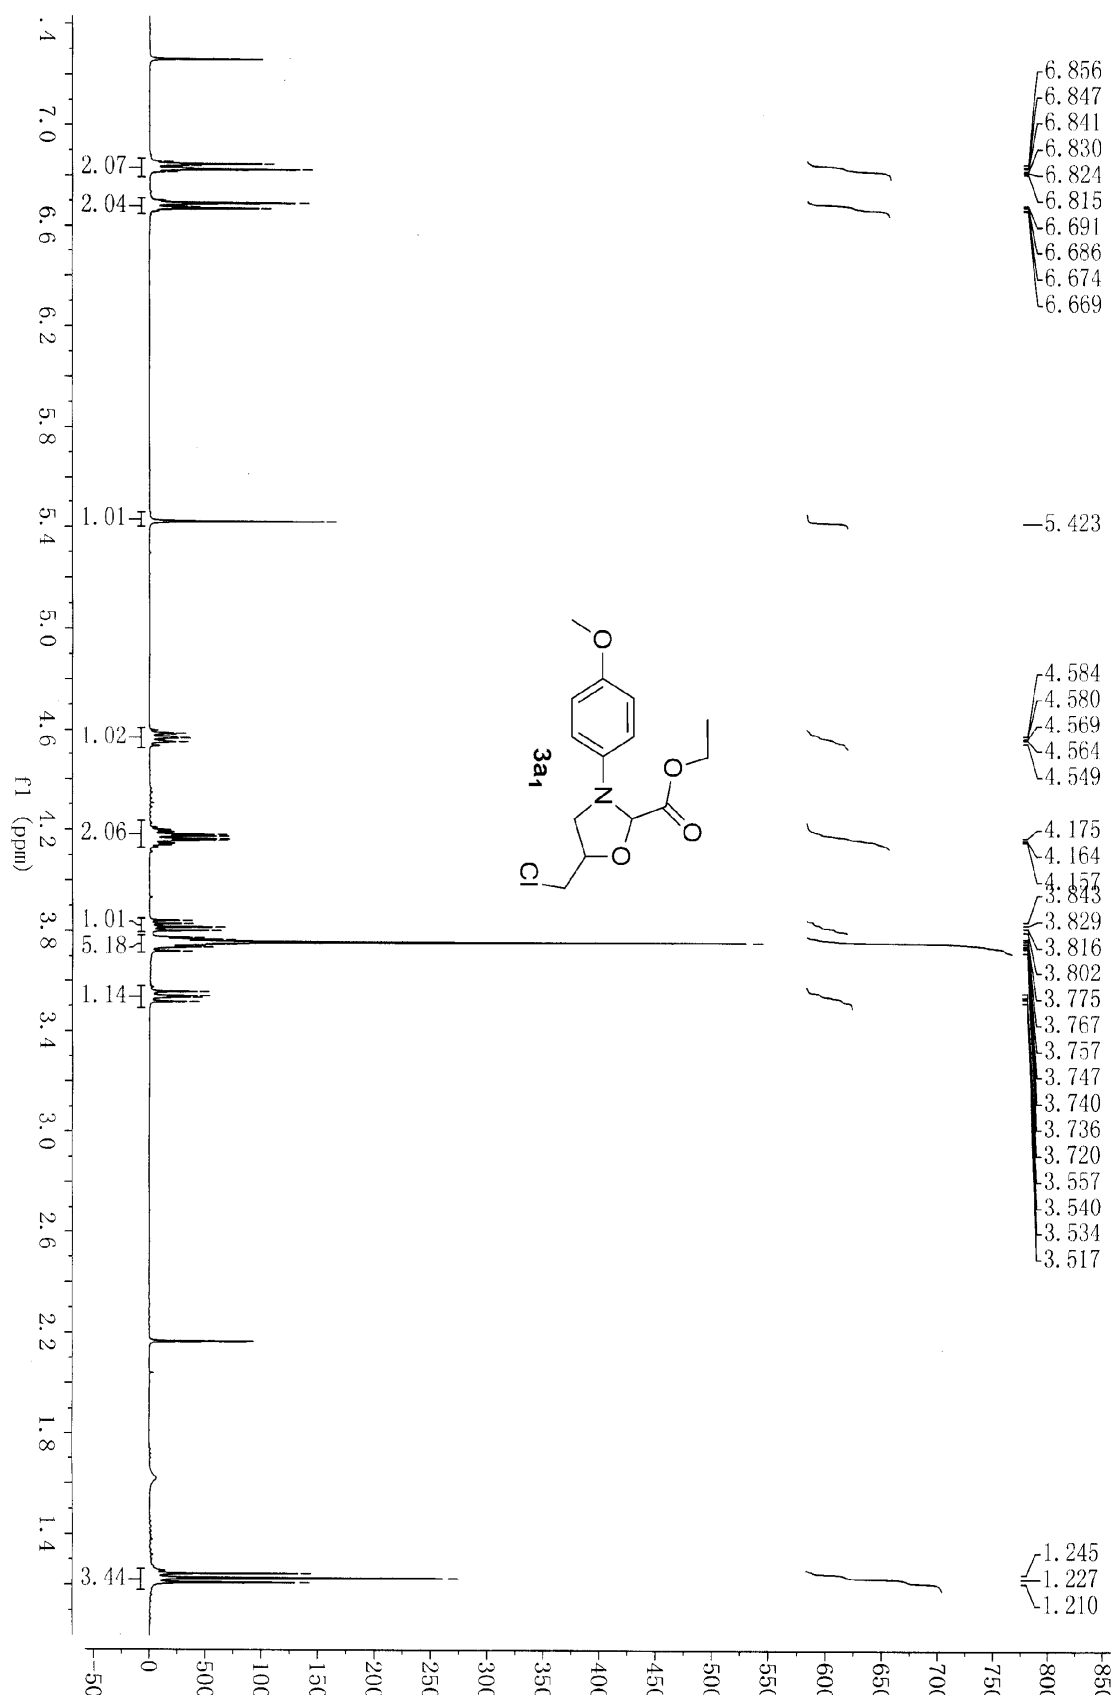Figure S1.  $^1\text{H-NMR}$  spectrum of product **3a1**.

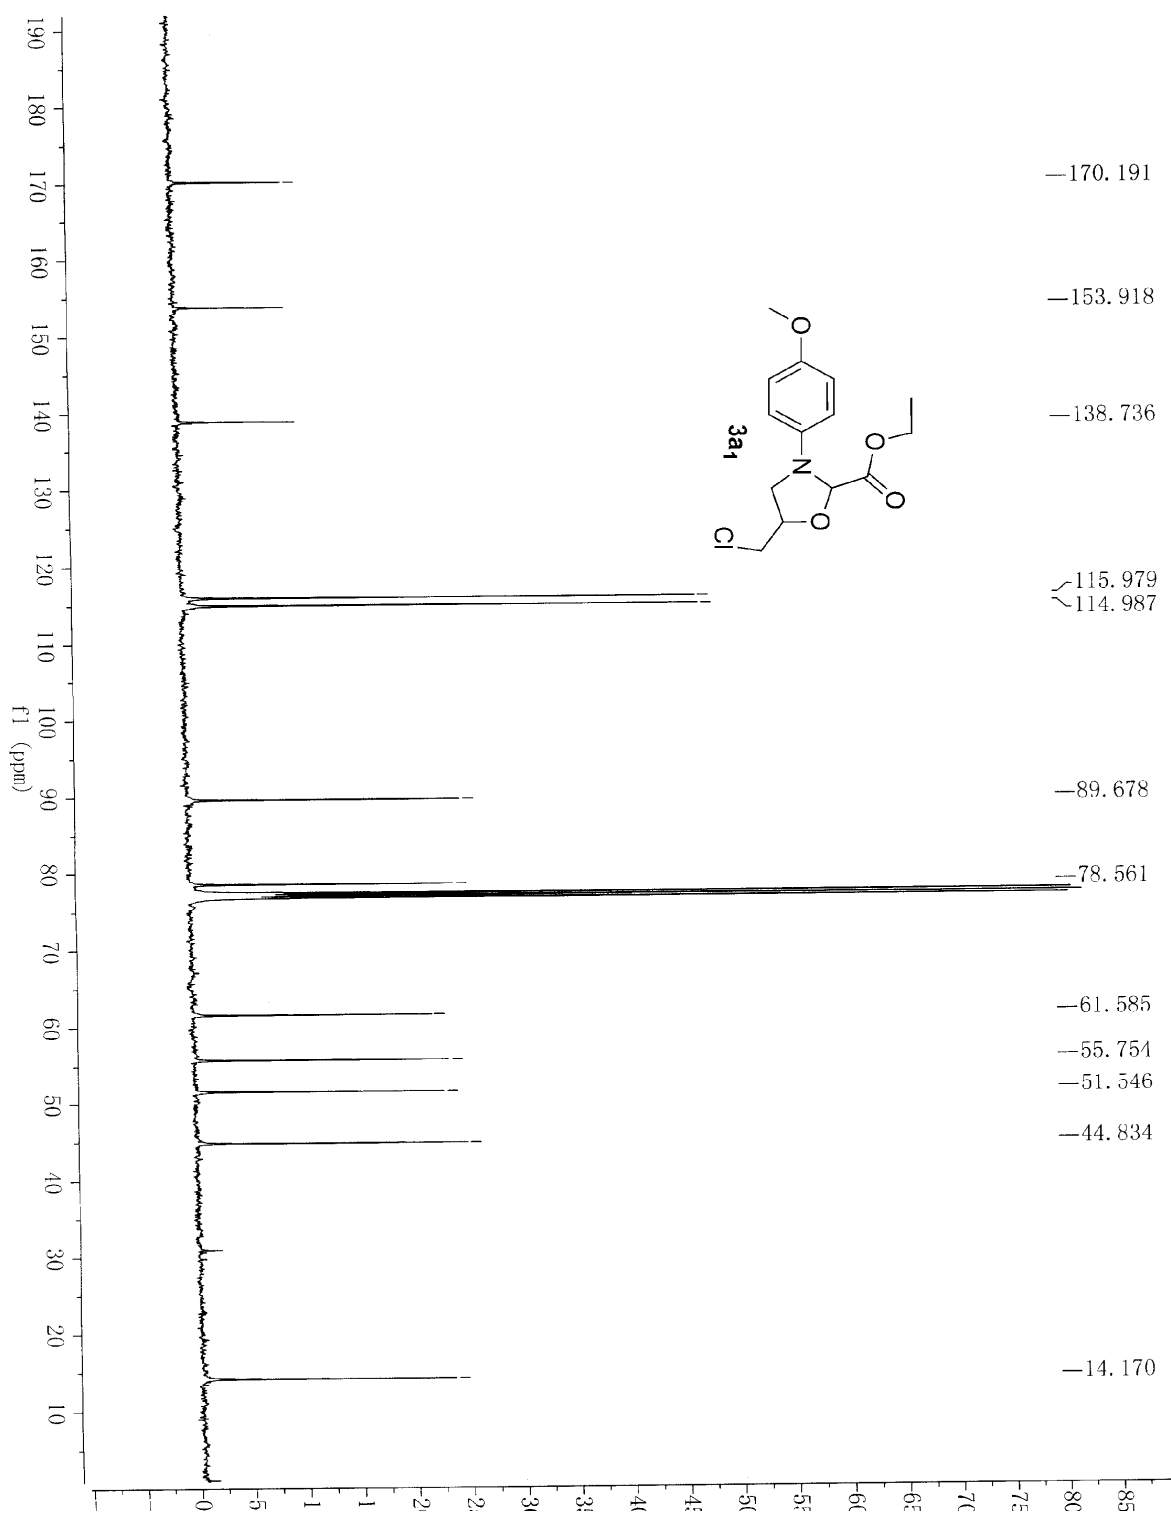

Figure S2. <sup>13</sup>C-NMR spectrum of product **3a1**.



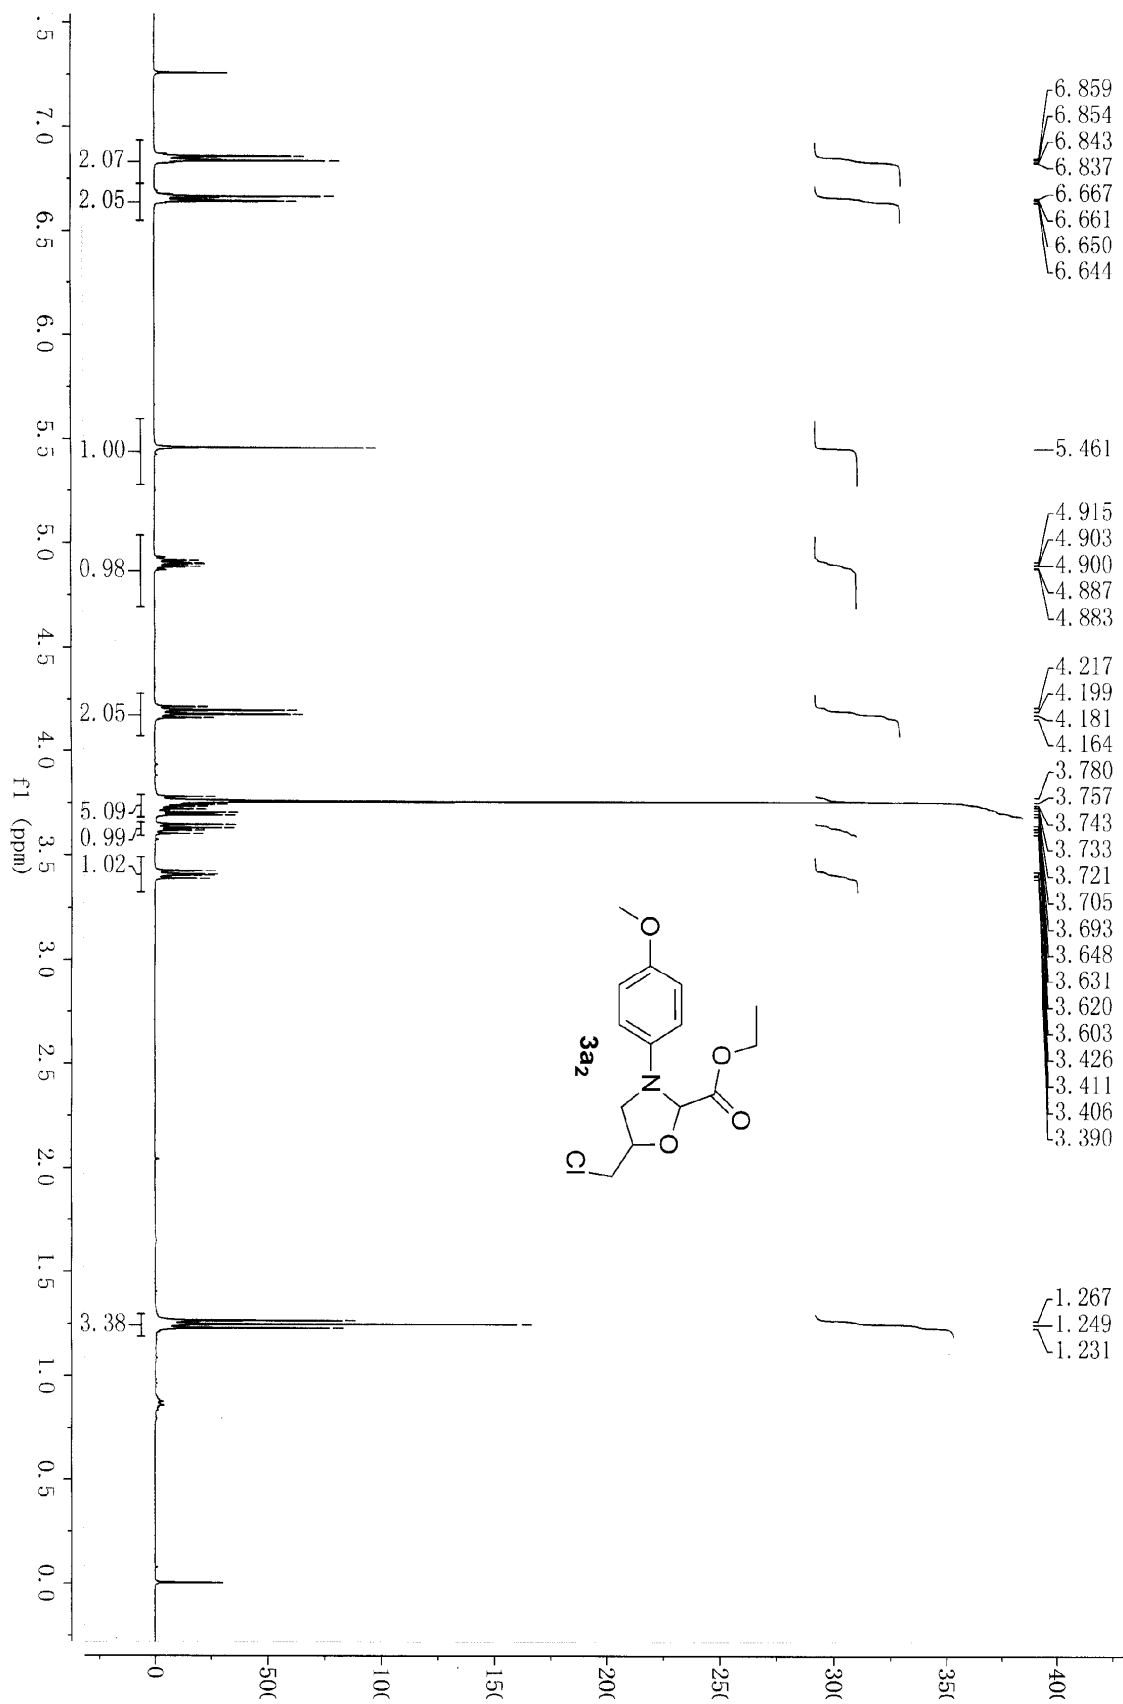

Figure S3. <sup>1</sup>H-NMR spectrum of product **3a2**.

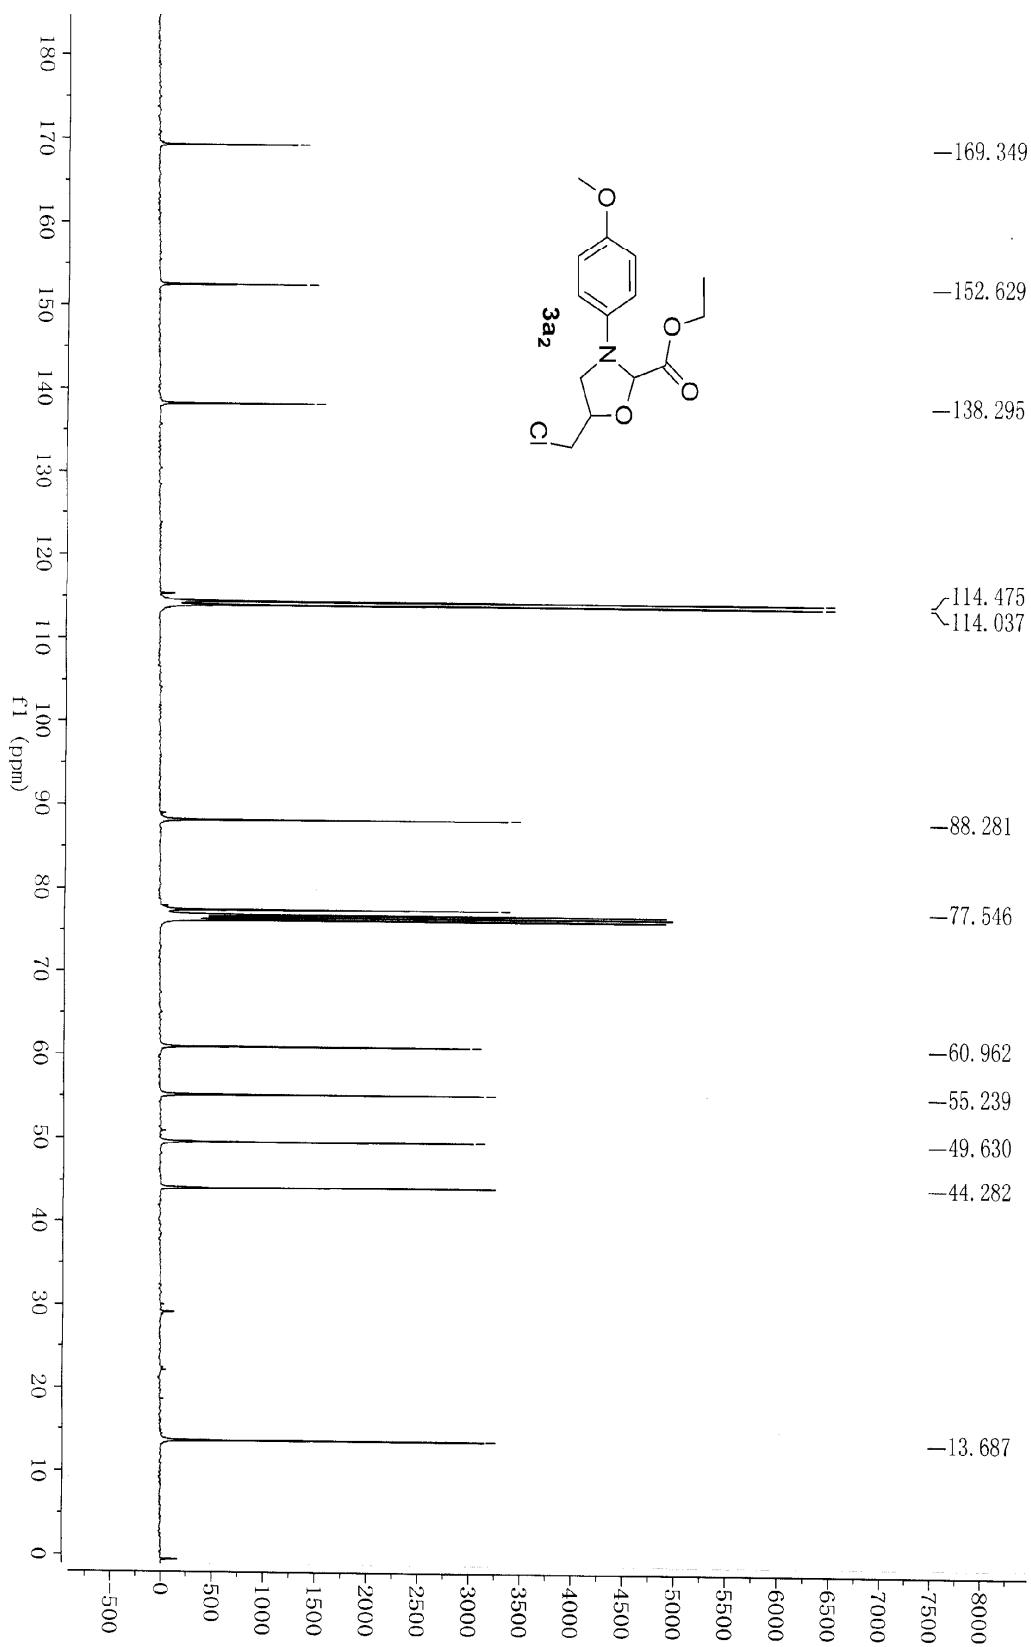

Figure S4.  $^{13}\text{C}$ -NMR spectrum of product **3a2**.

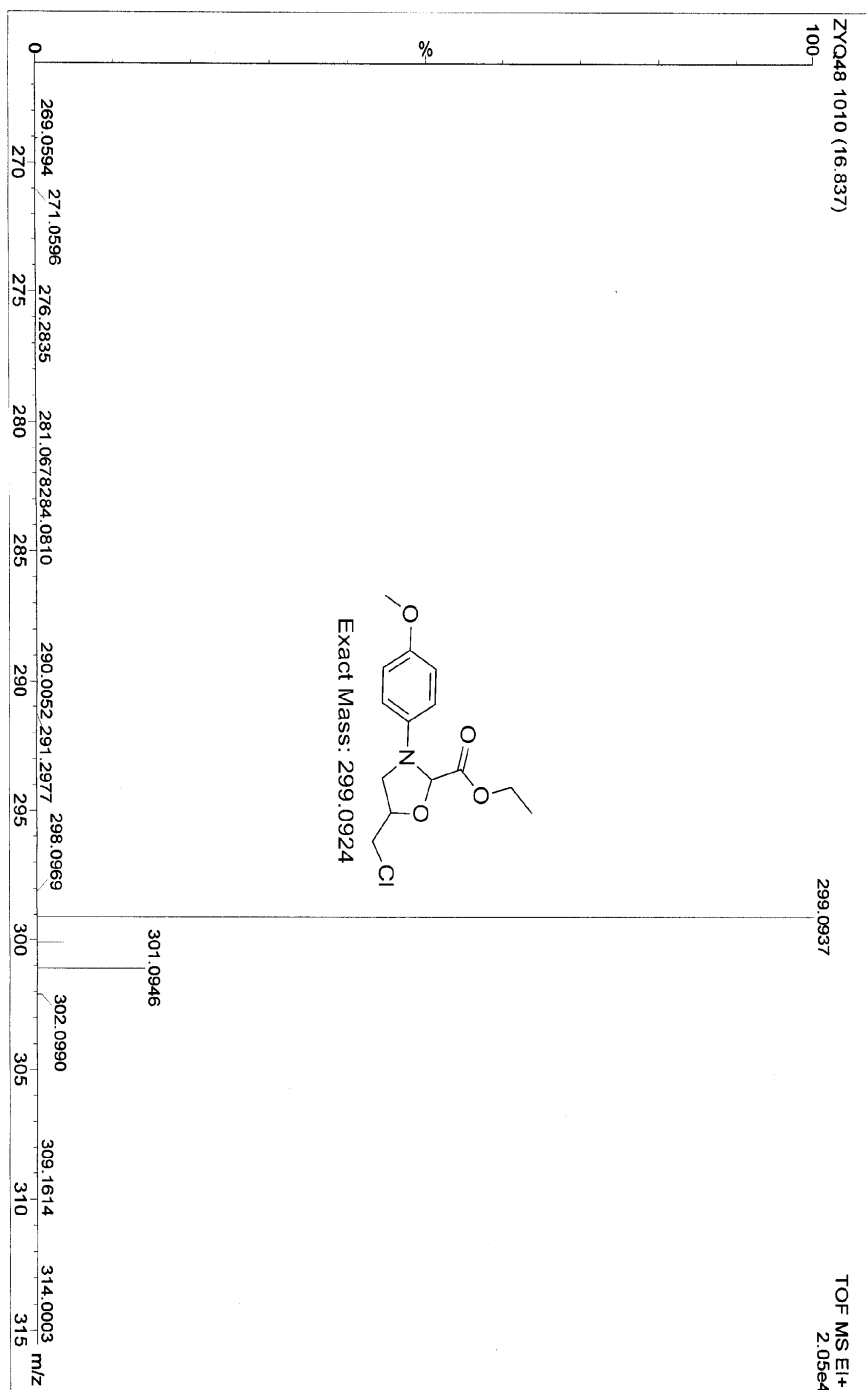

**Figure S5.** HRMS spectrum of product **3a**.

**Table S1.** HPLC analysis of product **3a**.

| Column       | CHIRALCEL OD-H(ODH0CE-LA084)             |
|--------------|------------------------------------------|
| Column size  | 0.46 cm I.D.*25 cm L                     |
| Injection    | 20 $\mu$ L                               |
| Mobile phase | <i>n</i> -Hexane/2-propanol = 95/5 (v/v) |
| Flow rate    | 0.5 mL/min                               |
| Wave length  | UV 254 nm                                |
| Temperature  | 25 $^{\circ}$ C                          |
| Solvents     | Hexane, 2-propanol: HPLC grade           |

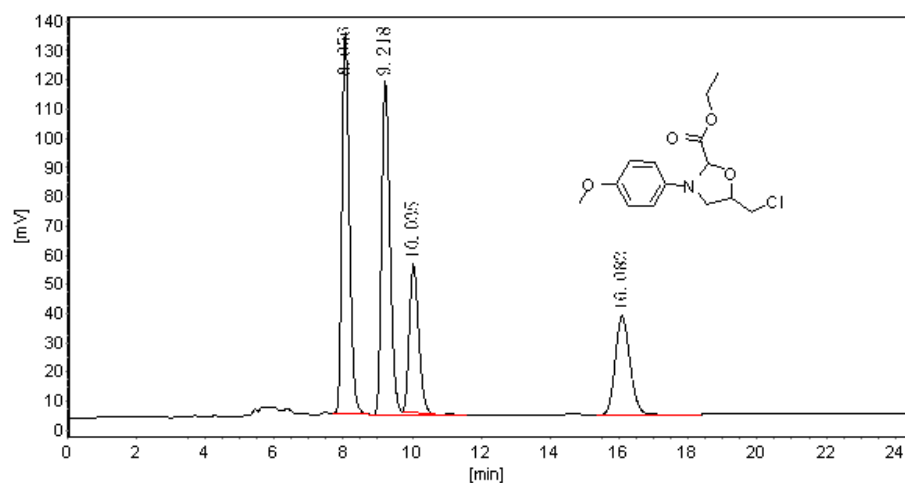

| Peak NO. | Time   | Height | Area    | Area % |
|----------|--------|--------|---------|--------|
| 1        | 8.056  | 129400 | 1961968 | 33.18  |
| 2        | 9.218  | 113407 | 1976474 | 33.42  |
| 3        | 10.035 | 50131  | 956629  | 16.17  |
| 4        | 16.082 | 33578  | 1017946 | 17.23  |

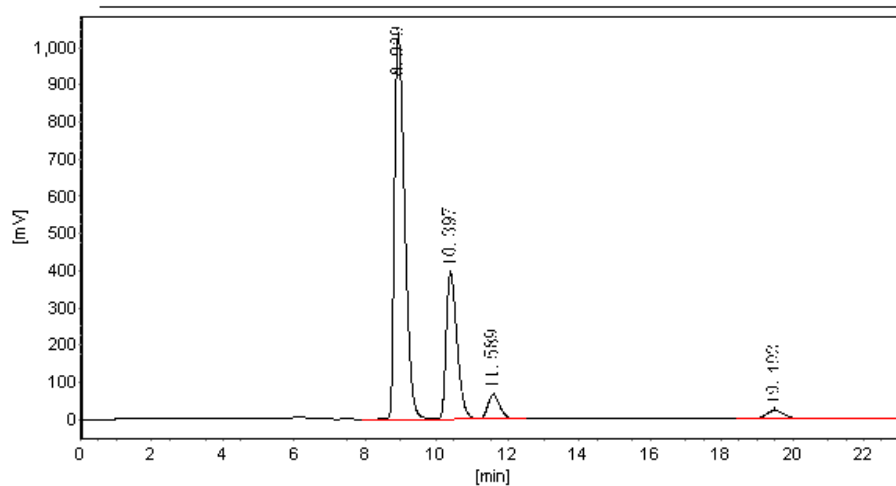

| Peak NO. | Time   | Height  | Area     | Area % |
|----------|--------|---------|----------|--------|
| 1        | 8.929  | 1033708 | 20719776 | 66.03  |
| 2        | 10.397 | 394183  | 8337735  | 26.57  |
| 3        | 11.589 | 64884   | 1516792  | 4.85   |
| 4        | 19.492 | 22418   | 802364   | 2.55   |

Figure S6. Cont.

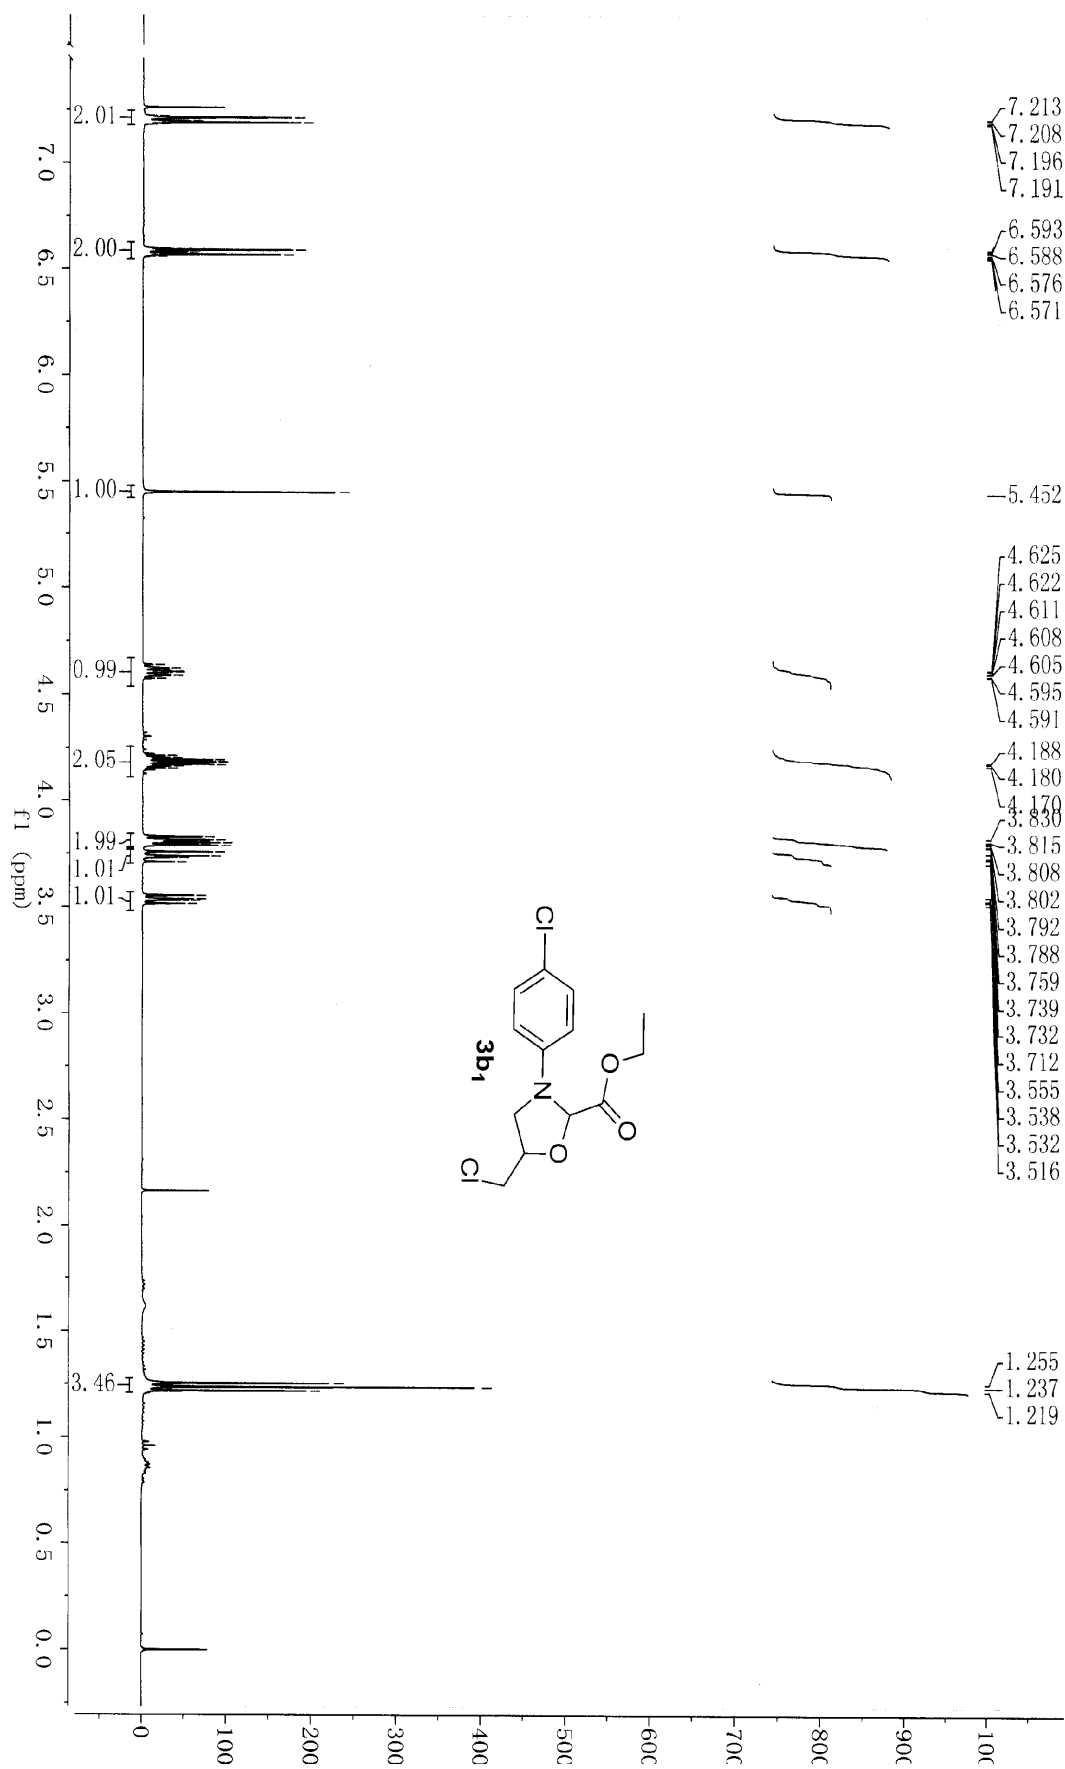

Figure S6. <sup>1</sup>H-NMR spectrum of product **3b1**.

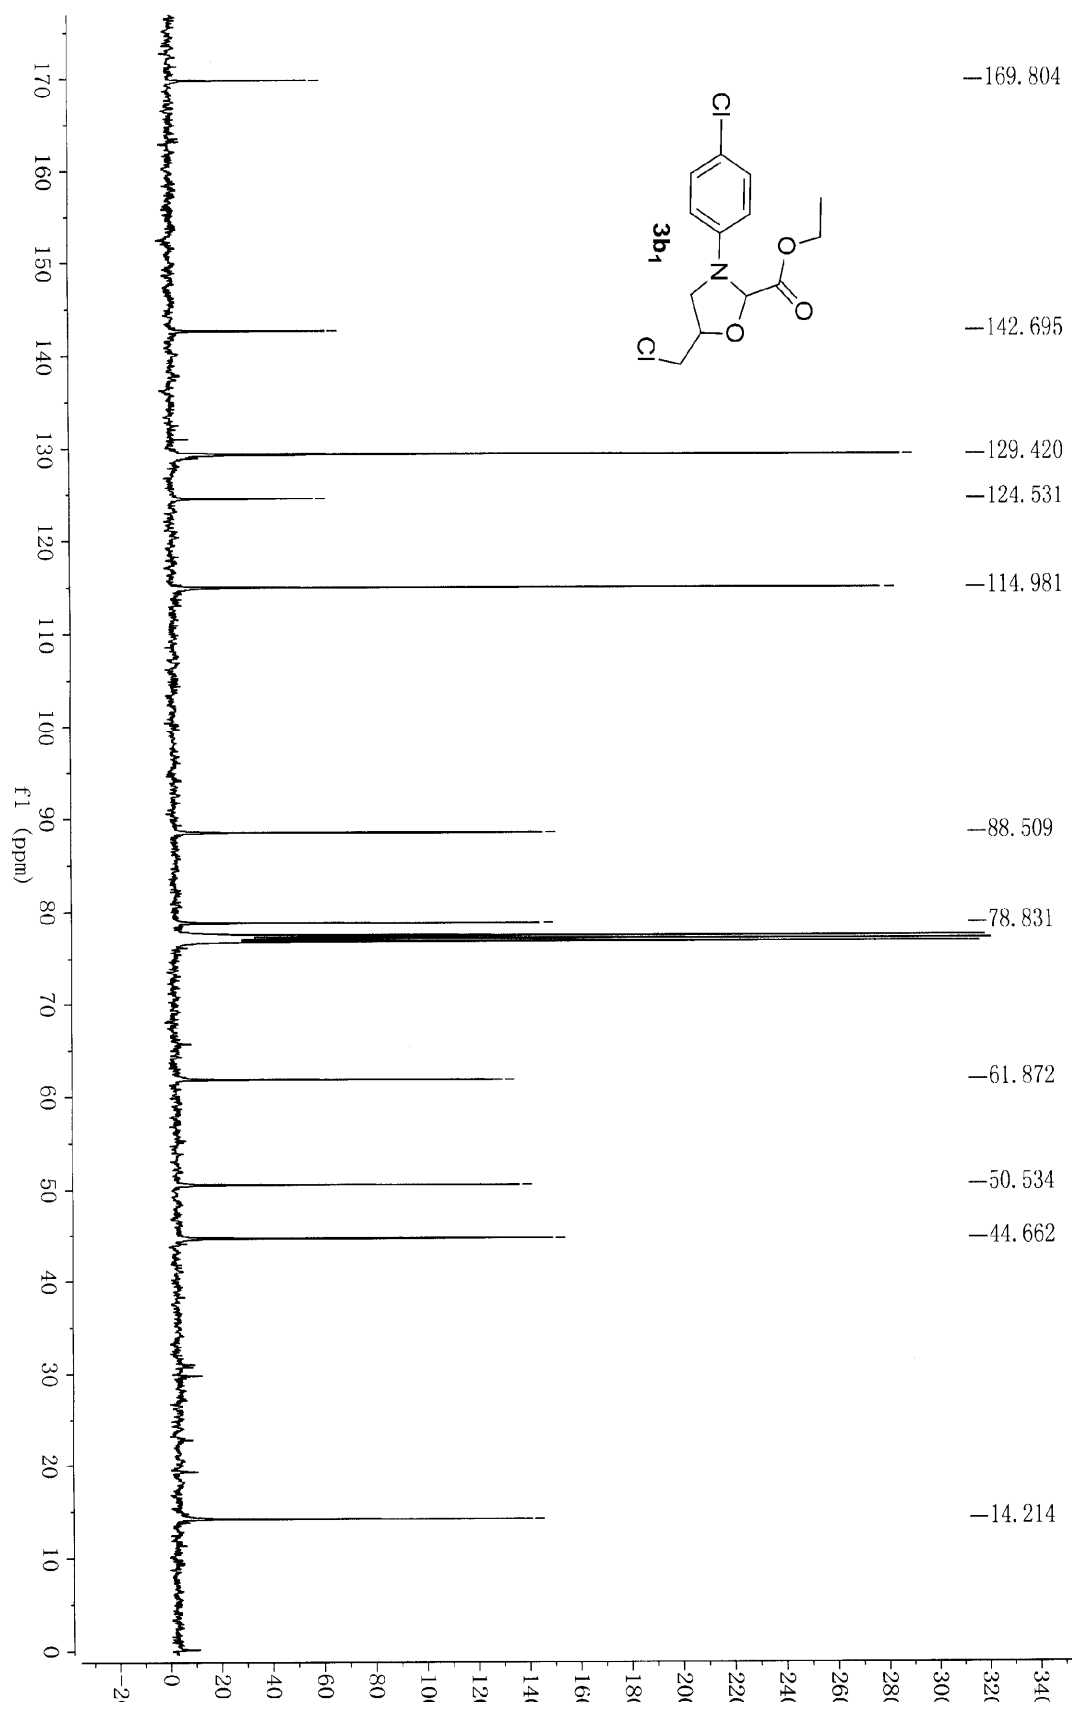

Figure S7.  $^{13}\text{C}$ -NMR spectrum of product **3b1**.

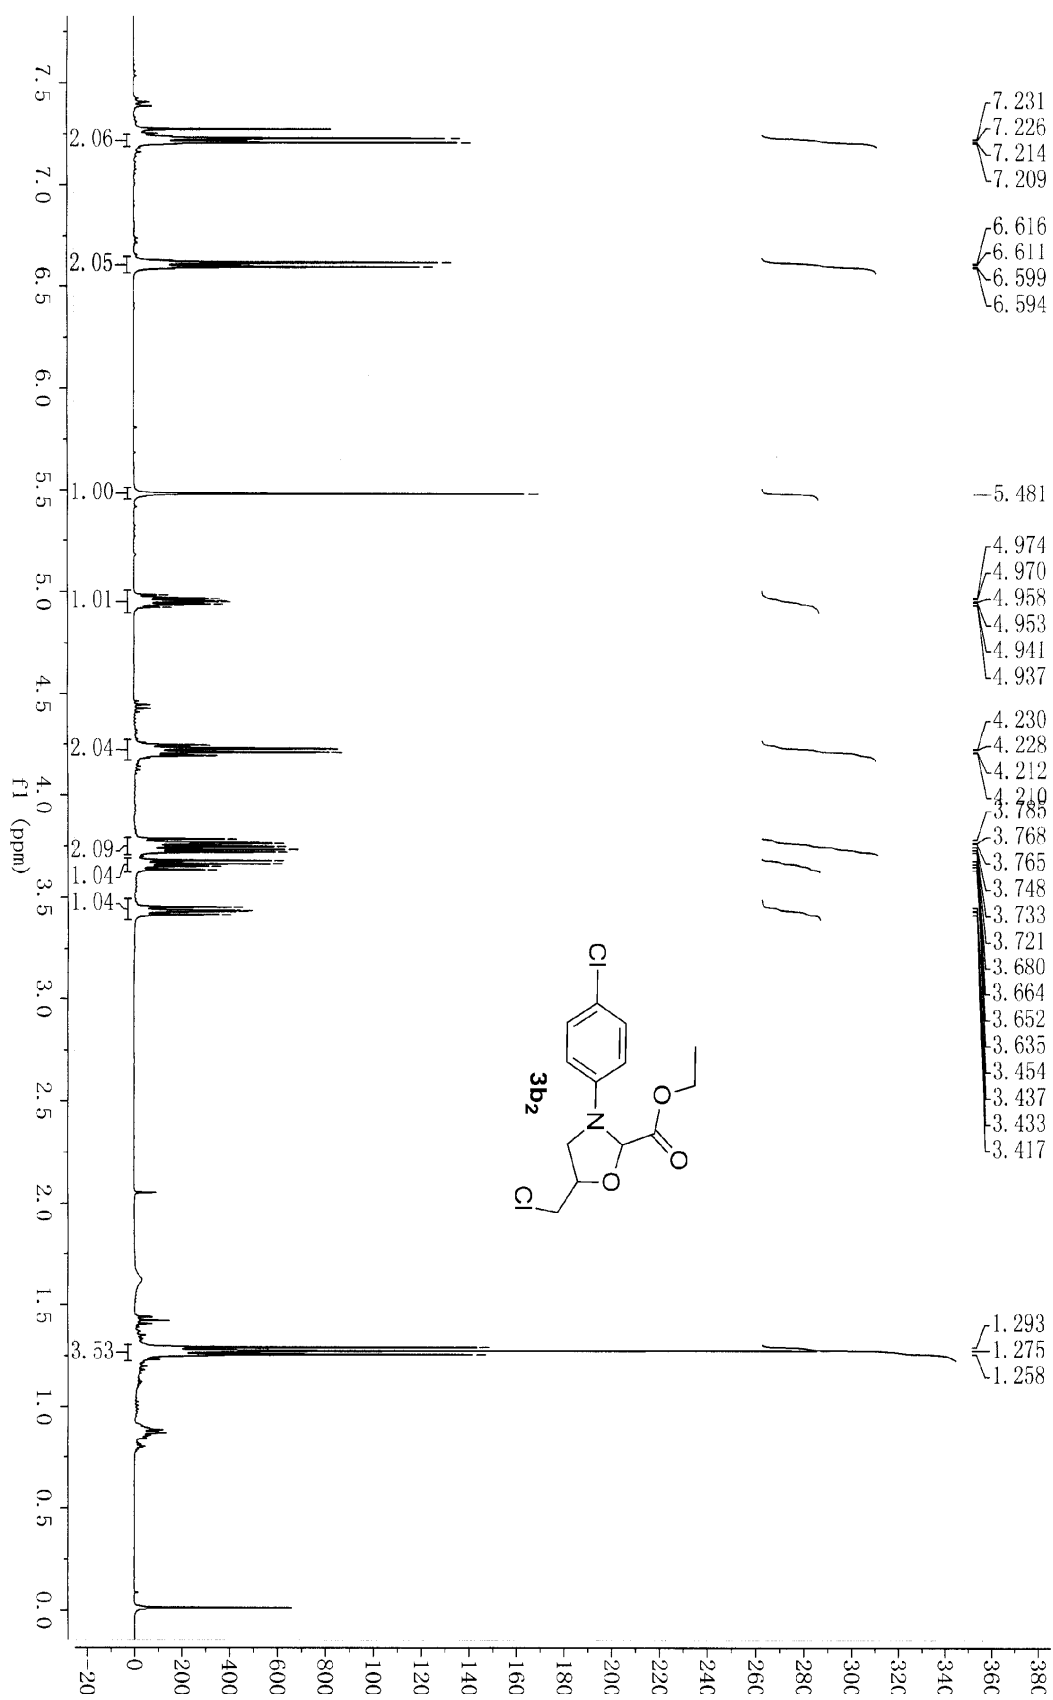

Figure S8. <sup>1</sup>H-NMR spectrum of product **3b<sub>2</sub>**.

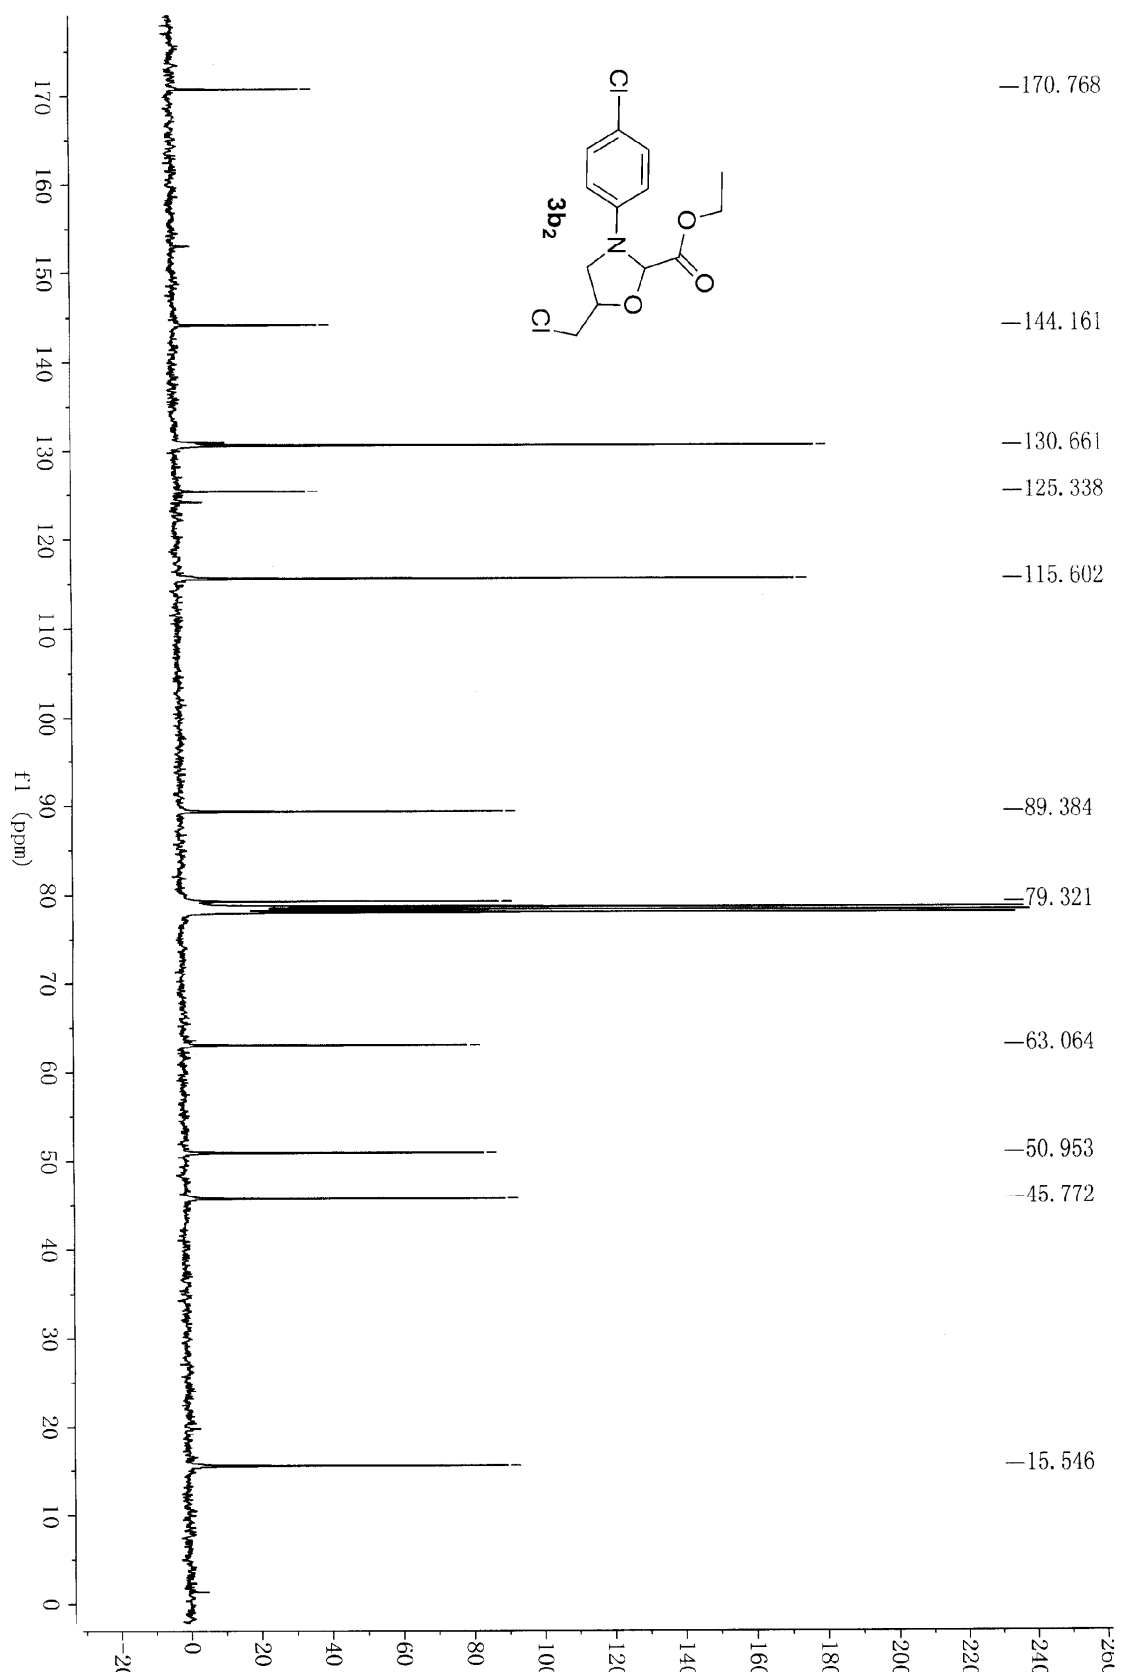

Figure S9.  $^{13}\text{C}$ -NMR spectrum of product **3b2**.



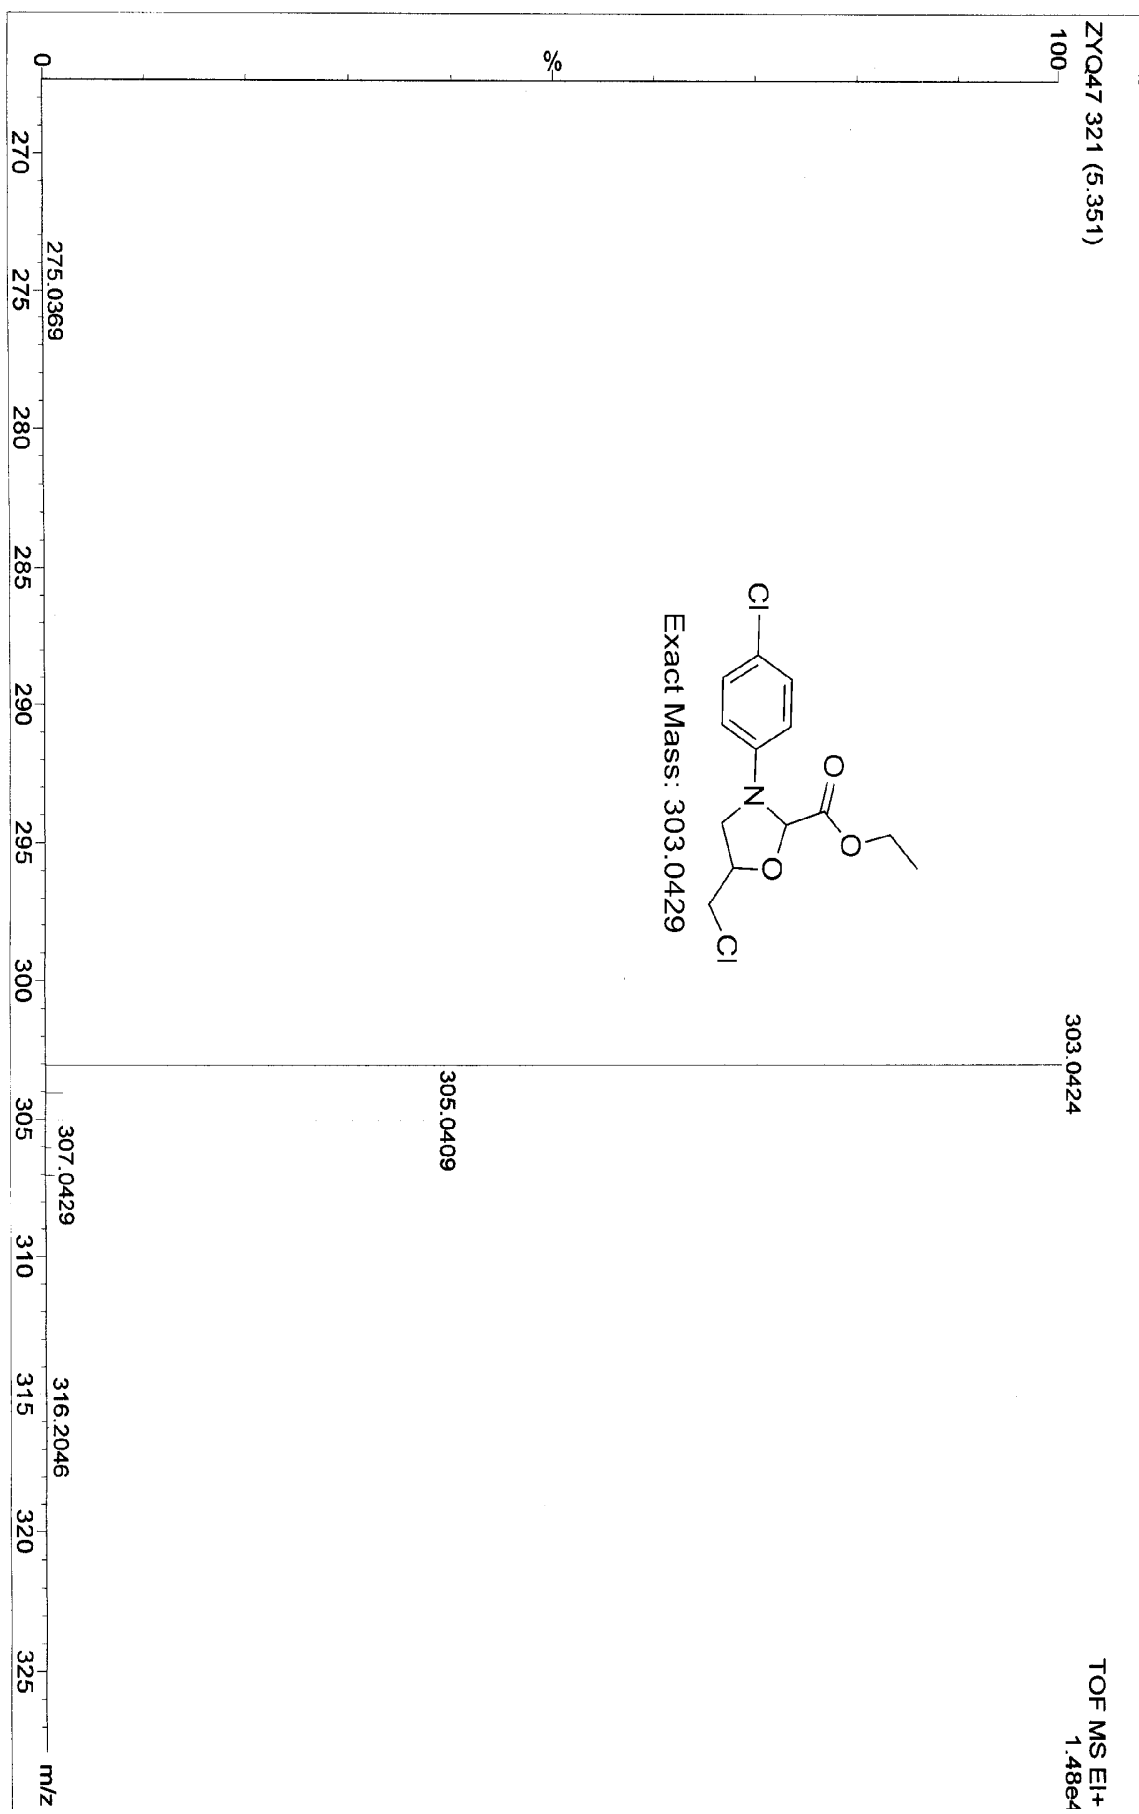Figure S10. HRMS spectrum of product **3b**.

Table S2.HPLC analysis of product 3b.

| Column       | CHIRALCEL OD-H(ODH0CE-LA084)             |
|--------------|------------------------------------------|
| Column size  | 0.46 cm I.D.*25 cm L                     |
| Injection    | 20 $\mu$ L                               |
| Mobile phase | <i>n</i> -Hexane/2-propanol = 95/5 (v/v) |
| Flow rate    | 1.0 mL/min                               |
| Wave length  | UV 254 nm                                |
| Temperature  | 25 $^{\circ}$ C                          |
| Solvents     | Hexane, 2-propanol: HPLC grade           |

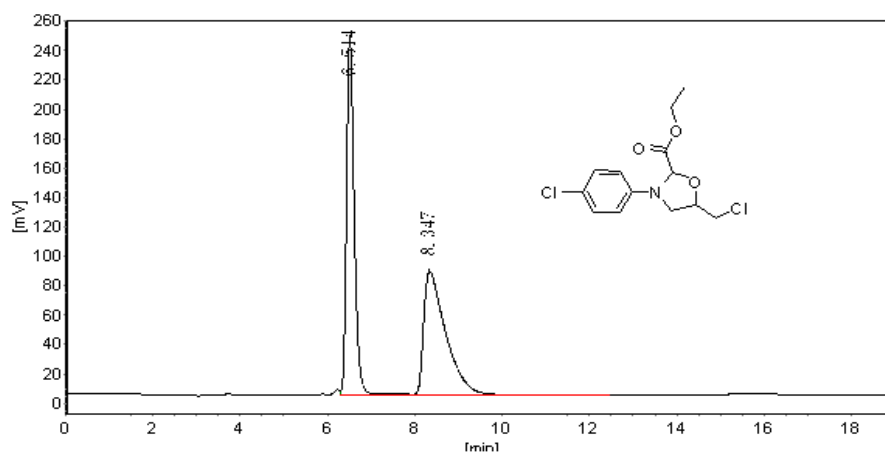

| Peak NO. | Time  | Height | Area    | Area %   |
|----------|-------|--------|---------|----------|
| 1        | 6.514 | 242473 | 3021599 | 51.06722 |
| 2        | 8.347 | 83604  | 2895306 | 48.93278 |

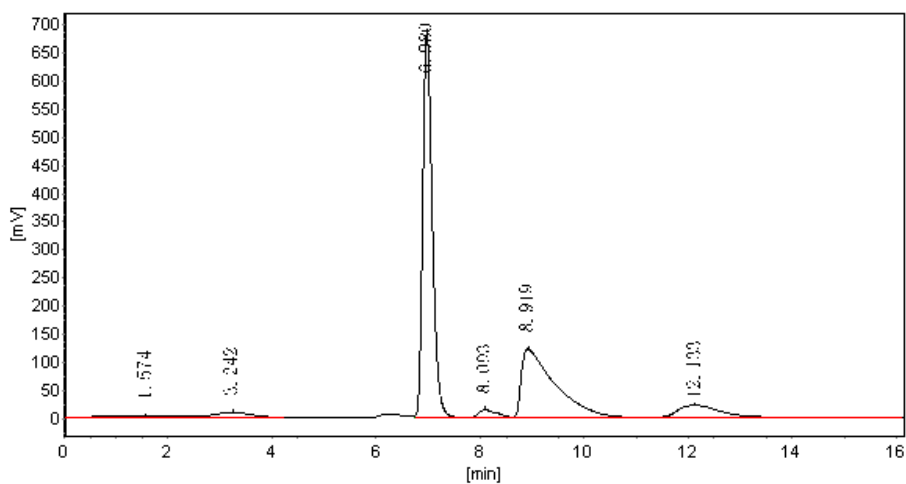

| Peak NO. | Time   | Height | Area    | Area % |
|----------|--------|--------|---------|--------|
| 1        | 6.980  | 684506 | 8797170 | 53.75  |
| 2        | 8.093  | 13468  | 301372  | 1.84   |
| 3        | 8.919  | 121180 | 5434782 | 33.20  |
| 4        | 12.133 | 21182  | 1245096 | 7.61   |

Figure S11. Cont.

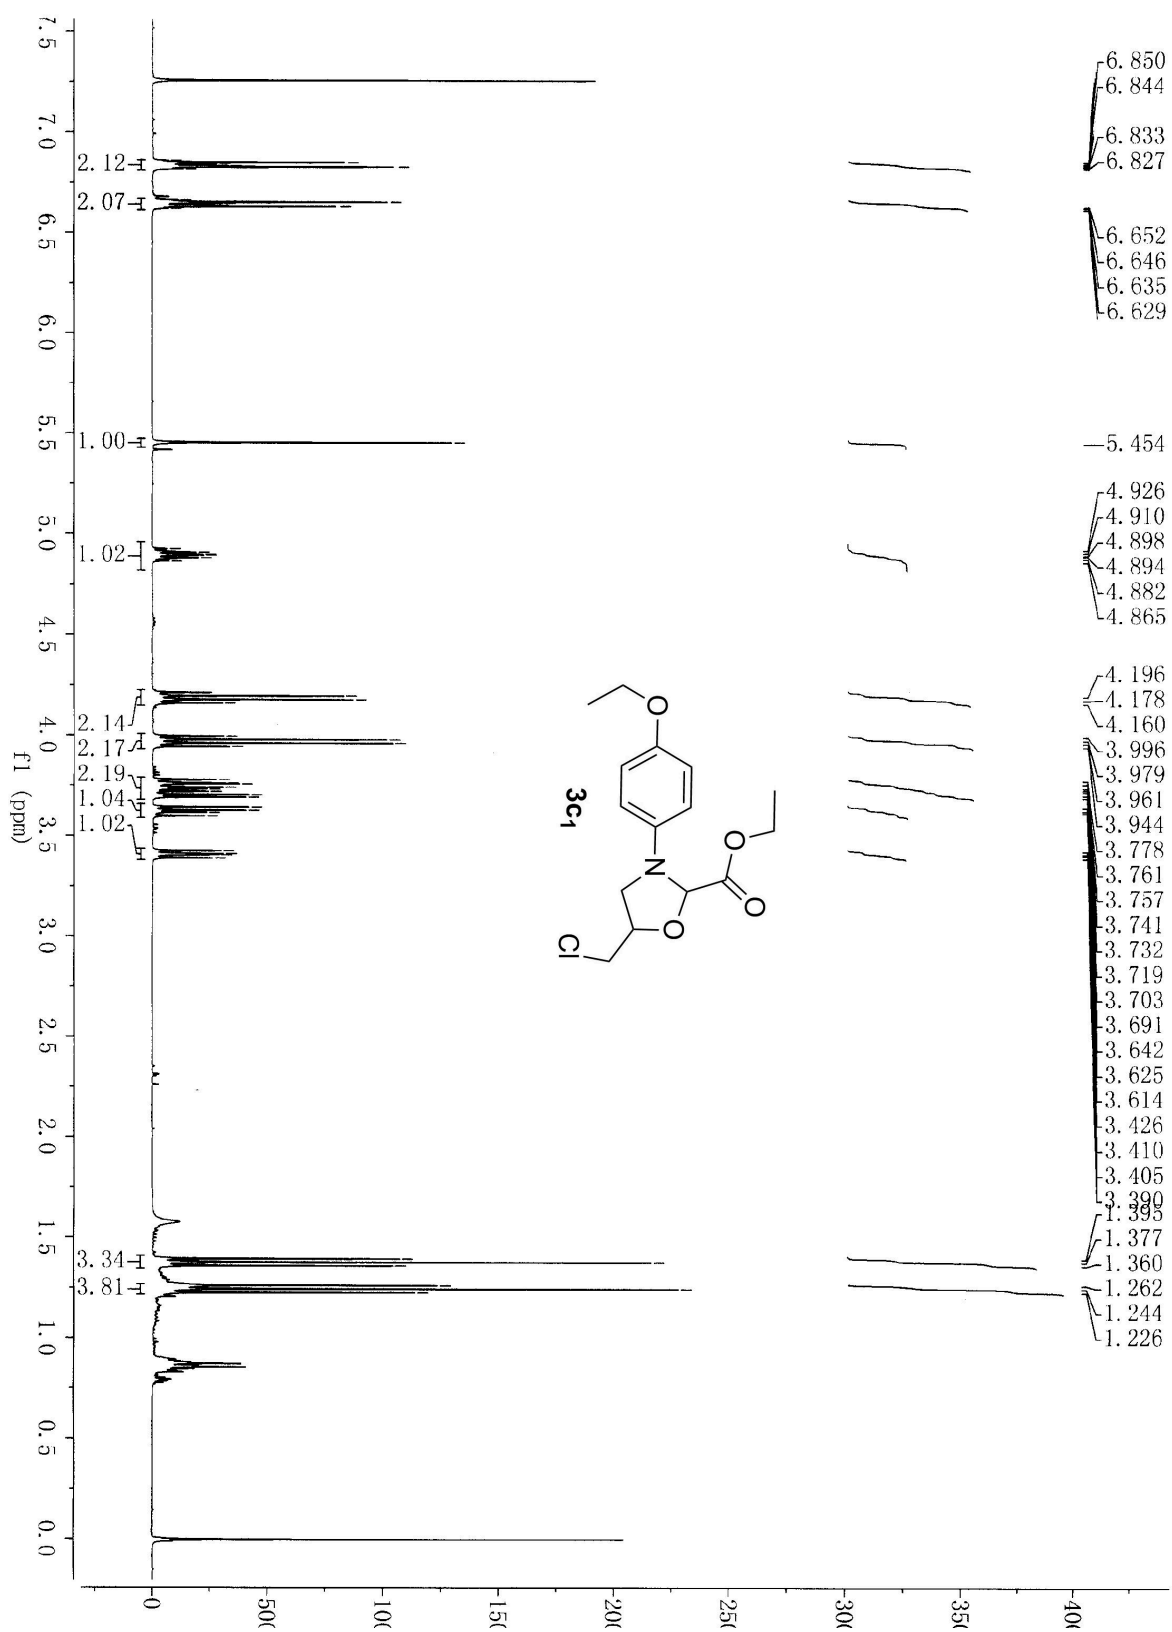

Figure S11. <sup>1</sup>H-NMR spectrum of product **3c1**.

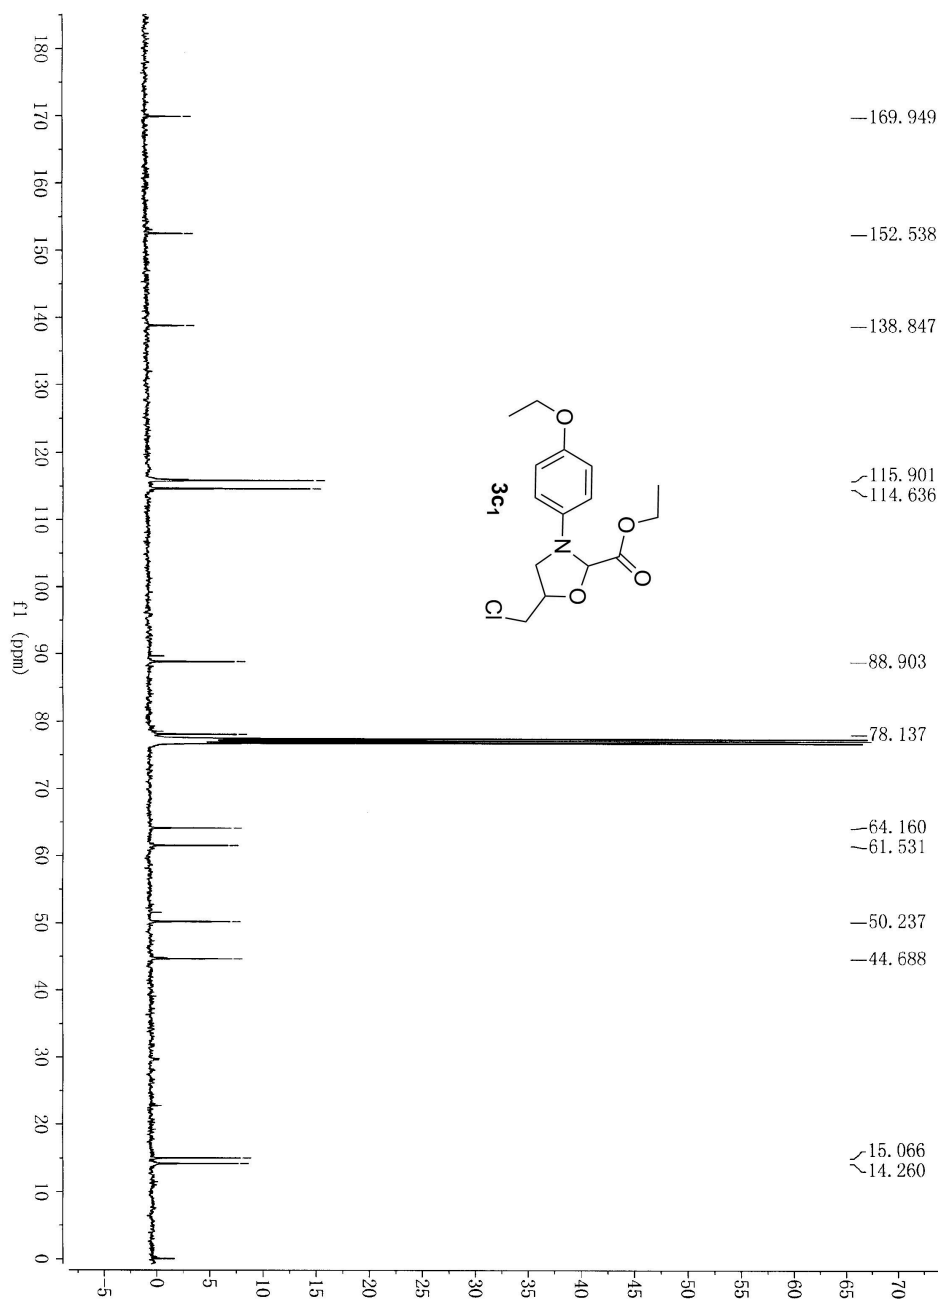

**Figure S12.**  $^{13}\text{C}$ -NMR spectrum of product **3c<sub>1</sub>**.

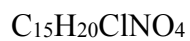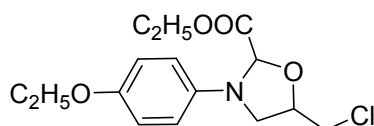

**3c**

**3c.**  $\text{C}_{15}\text{H}_{20}\text{ClNO}_4$  **HRMS** (ESI<sup>+</sup>) exact mass calculated for  $[\text{M} + \text{H}]^+$  requires  $m/z$  314.1154, found  $m/z$  314.1155.

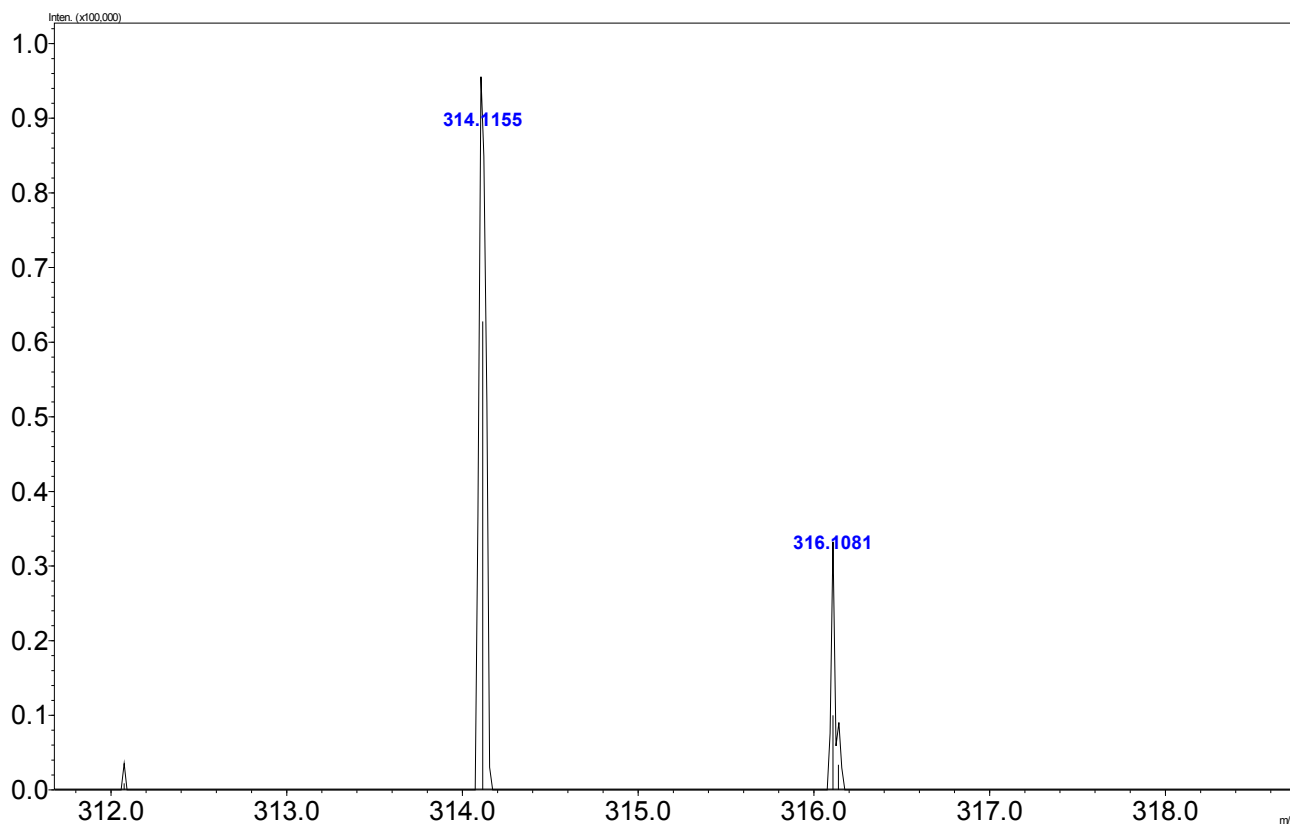

**Figure S13.** HRMS spectrum of product **3c**.

**Table S3.** HPLC analysis of product **3c**.

| Column       | CHIRALCEL OD-H(ODH0CE-LA084)             |
|--------------|------------------------------------------|
| Column size  | 0.46 cm I.D.*25 cm L                     |
| Injection    | 20 $\mu$ L                               |
| Mobile phase | <i>n</i> -Hexane/2-propanol = 95/5 (v/v) |
| Flow rate    | 0.5 mL/min                               |
| Wave length  | UV 254 nm                                |
| Temperature  | 25 $^{\circ}$ C                          |
| Solvents     | Hexane, 2-propanol: HPLC grade           |

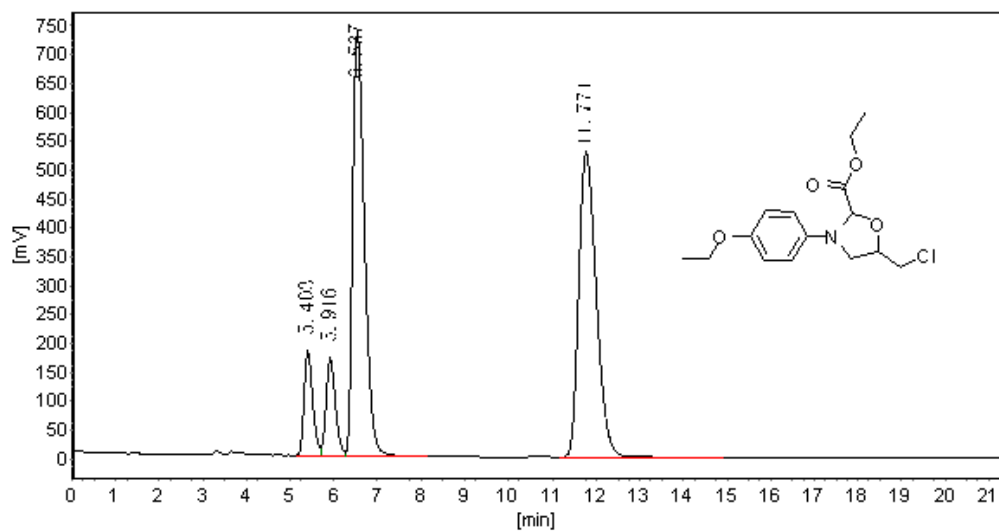

| Peak NO. | Time   | Height | Area     | Area %   |
|----------|--------|--------|----------|----------|
| 1        | 5.403  | 178396 | 2475583  | 7.38999  |
| 2        | 5.916  | 166075 | 2499357  | 7.46096  |
| 3        | 6.537  | 731553 | 13785348 | 40.95784 |
| 4        | 11.771 | 525642 | 14738841 | 43.79078 |

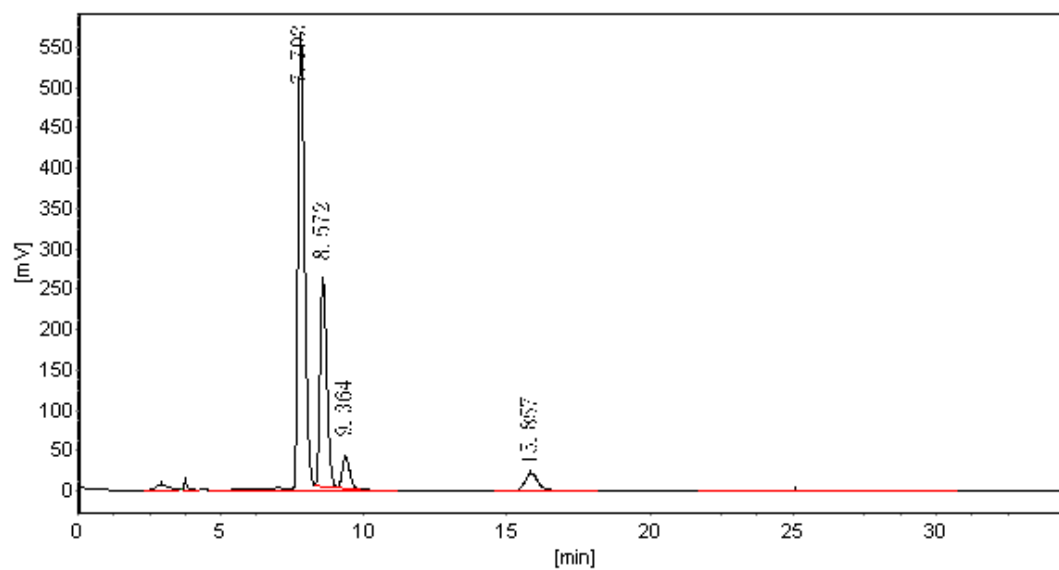

| Peak NO. | Time   | Height | Area    | Area % |
|----------|--------|--------|---------|--------|
| 1        | 7.792  | 563129 | 9516917 | 62.92  |
| 2        | 8.572  | 256372 | 4221726 | 27.91  |
| 3        | 9.364  | 38902  | 711214  | 4.70   |
| 4        | 15.857 | 21379  | 676902  | 4.47   |

Figure S14. Cont.

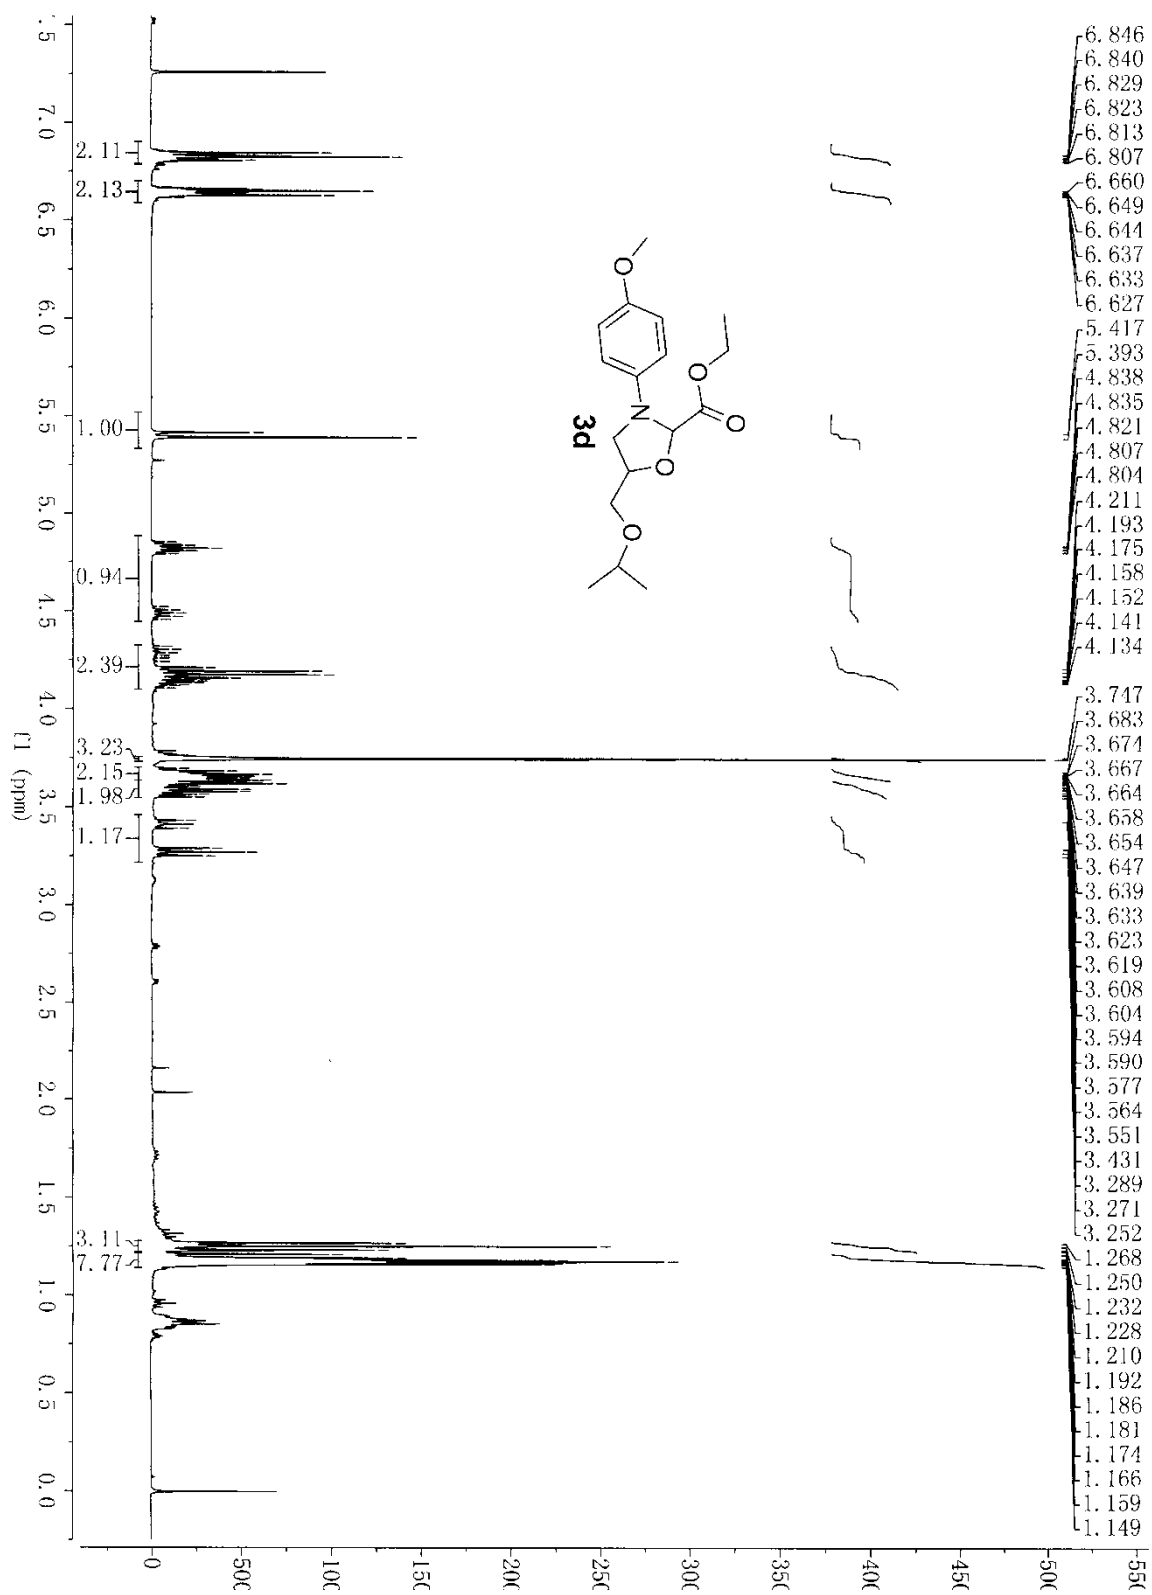

Figure S14. <sup>1</sup>H-NMR spectrum of product 3d.

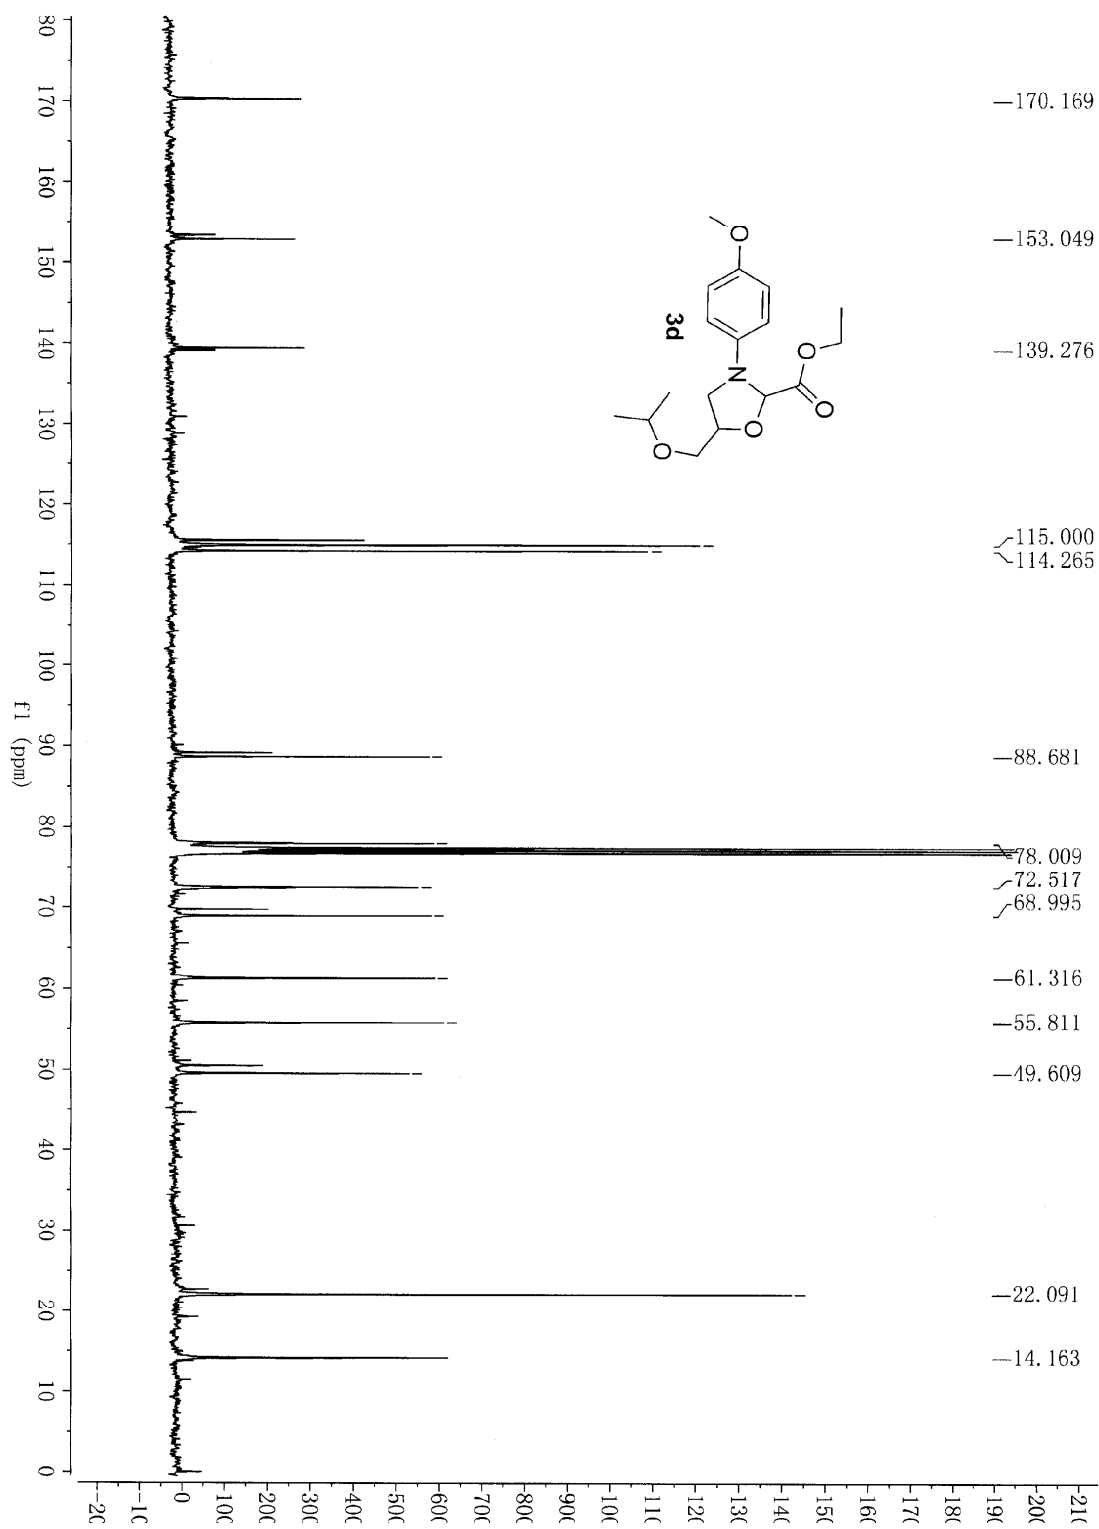

Figure S15.  $^{13}\text{C}$ -NMR spectrum of product **3d**.



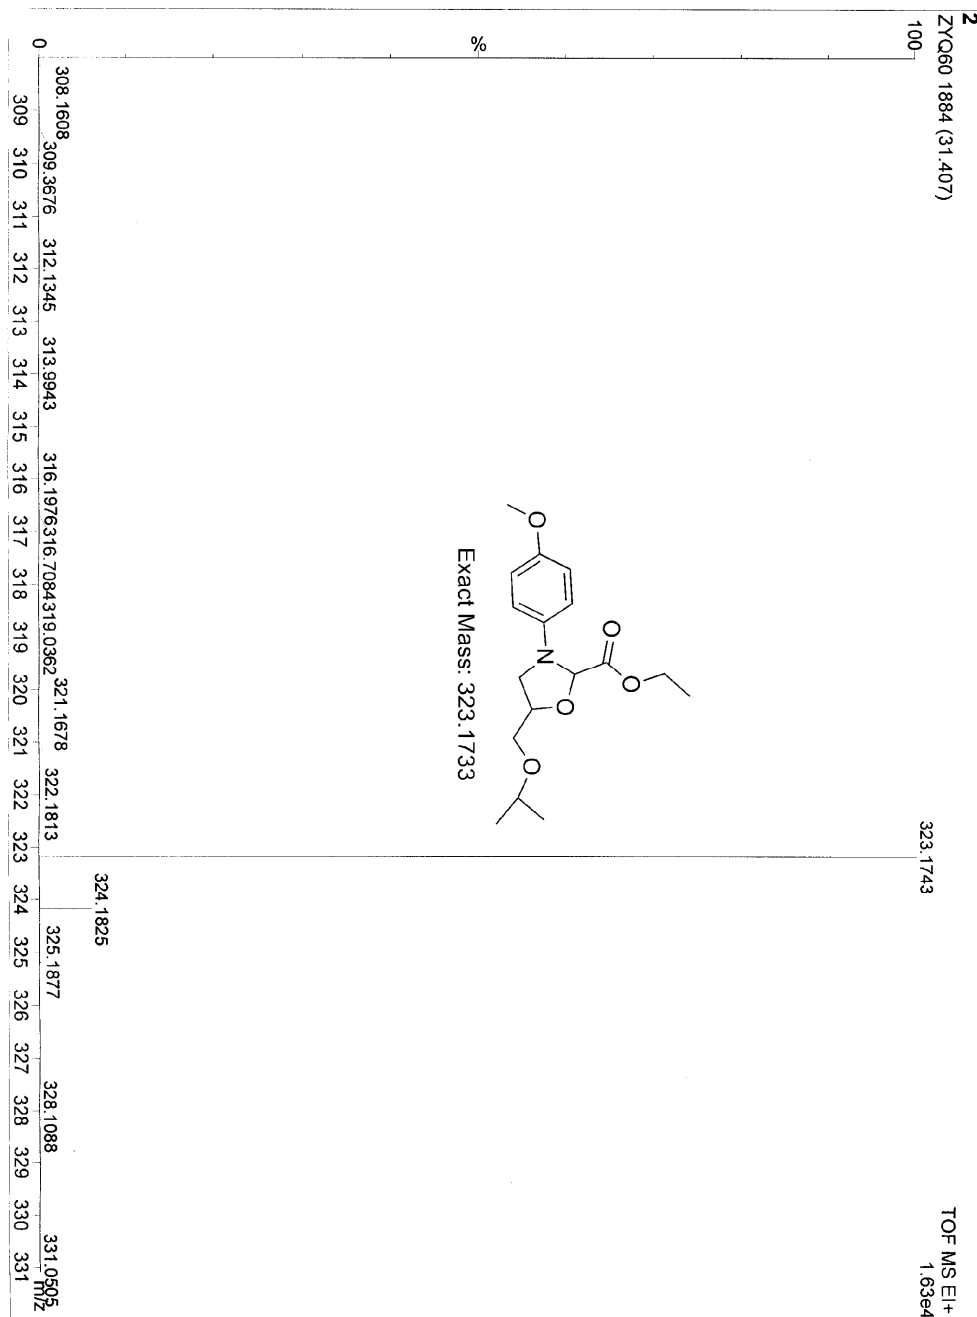

**Figure S16.** HRMS spectrum of product **3d**.

**Table S4.** HPLC analysis of product **3d**.

| Column       | CHIRALCEL OD-H(ODH0CE-LA084)             |
|--------------|------------------------------------------|
| Column size  | 0.46 cm I.D.*25 cm L                     |
| Injection    | 20 $\mu$ L                               |
| Mobile phase | <i>n</i> -Hexane/2-propanol = 95/5 (v/v) |
| Flow rate    | 0.5 mL/min                               |
| Wave length  | UV 254 nm                                |
| Temperature  | 25 $^{\circ}$ C                          |
| Solvents     | Hexane, 2-propanol: HPLC grade           |

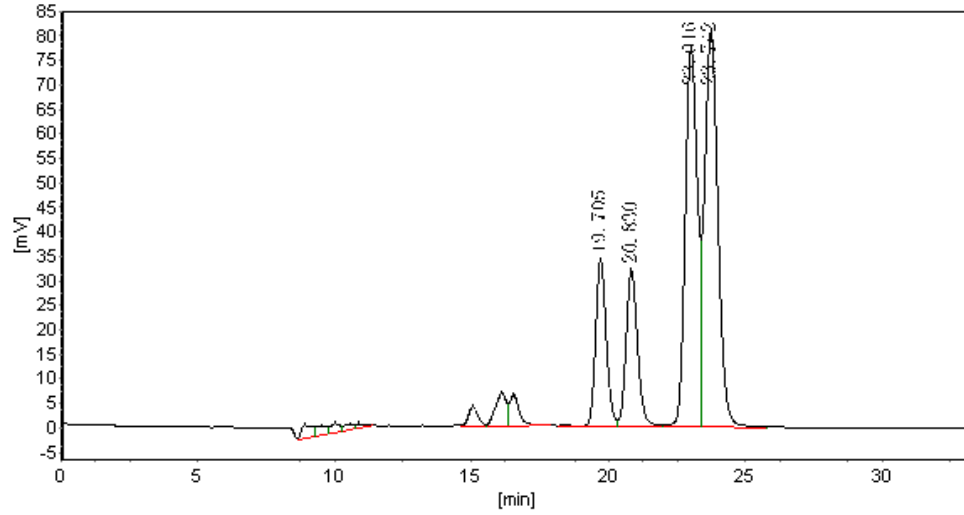

| Peak NO. | Time   | Height | Area    | Area % |
|----------|--------|--------|---------|--------|
| 1        | 19.705 | 33897  | 913178  | 13.01  |
| 2        | 20.830 | 31735  | 927902  | 13.23  |
| 3        | 23.016 | 77134  | 2406588 | 34.31  |
| 4        | 23.742 | 80733  | 2766602 | 39.44  |

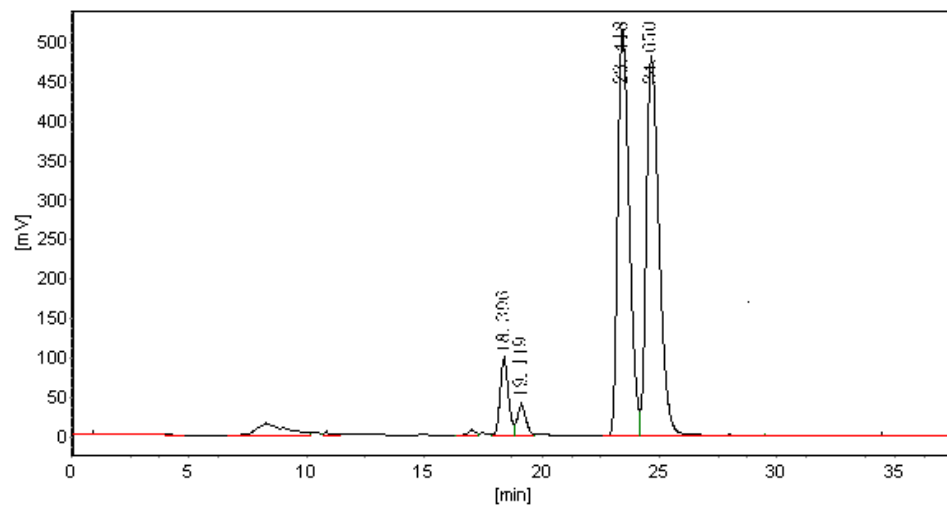

| Peak NO. | Time   | Height | Area     | Area % |
|----------|--------|--------|----------|--------|
| 1        | 18.396 | 96389  | 2387657  | 6.10   |
| 2        | 19.119 | 38401  | 985455   | 2.52   |
| 3        | 23.418 | 513120 | 17460244 | 44.67  |
| 4        | 24.650 | 478399 | 18258818 | 46.71  |

Figure S17. Cont.

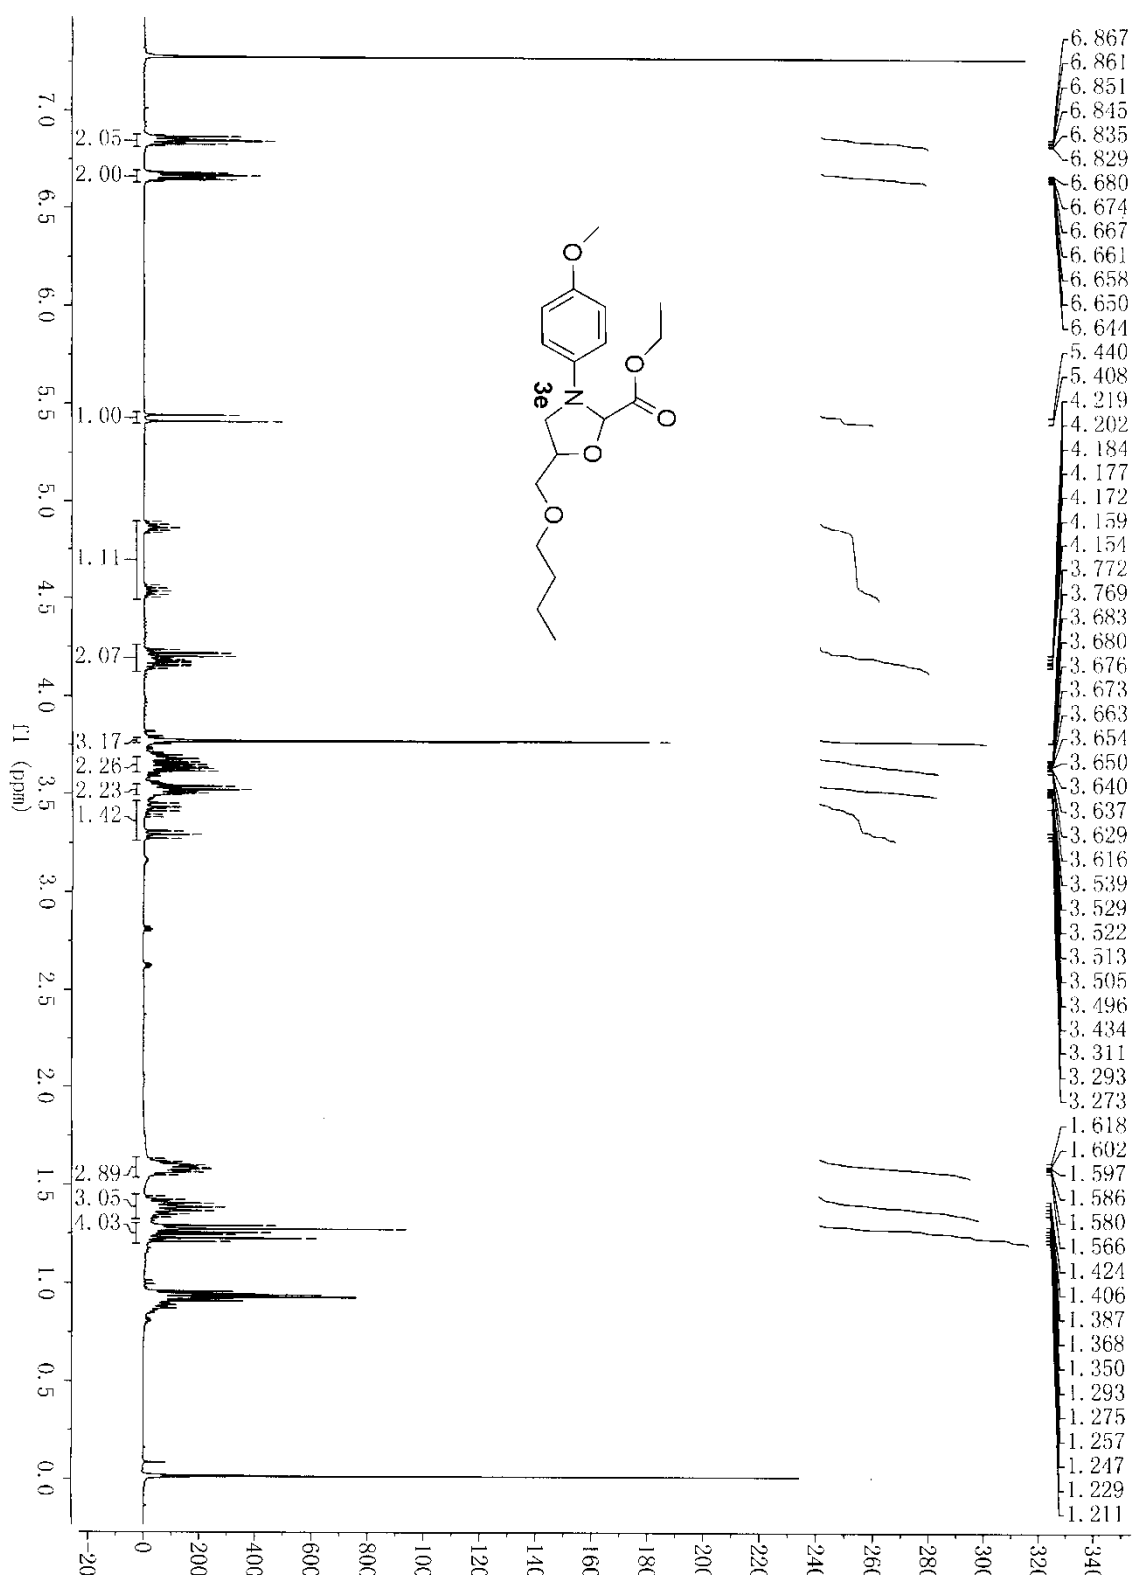

Figure S17. <sup>1</sup>H-NMR spectrum of product **3e**.

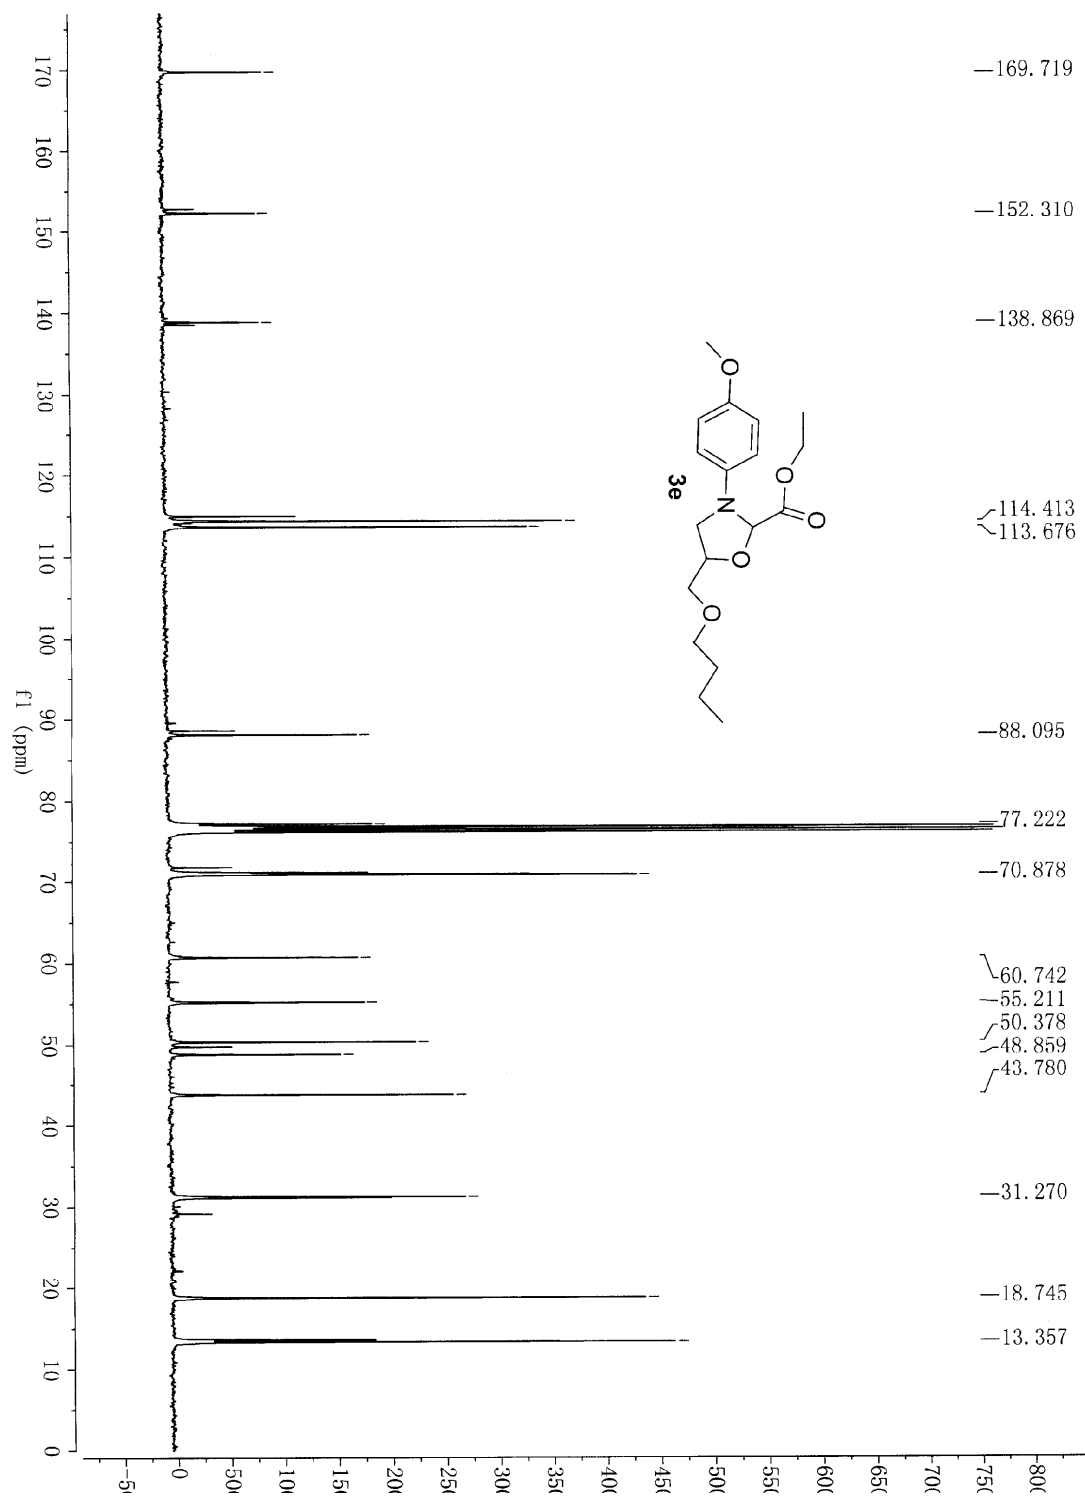

Figure S18.  $^{13}\text{C}$ -NMR spectrum of product **3e**.

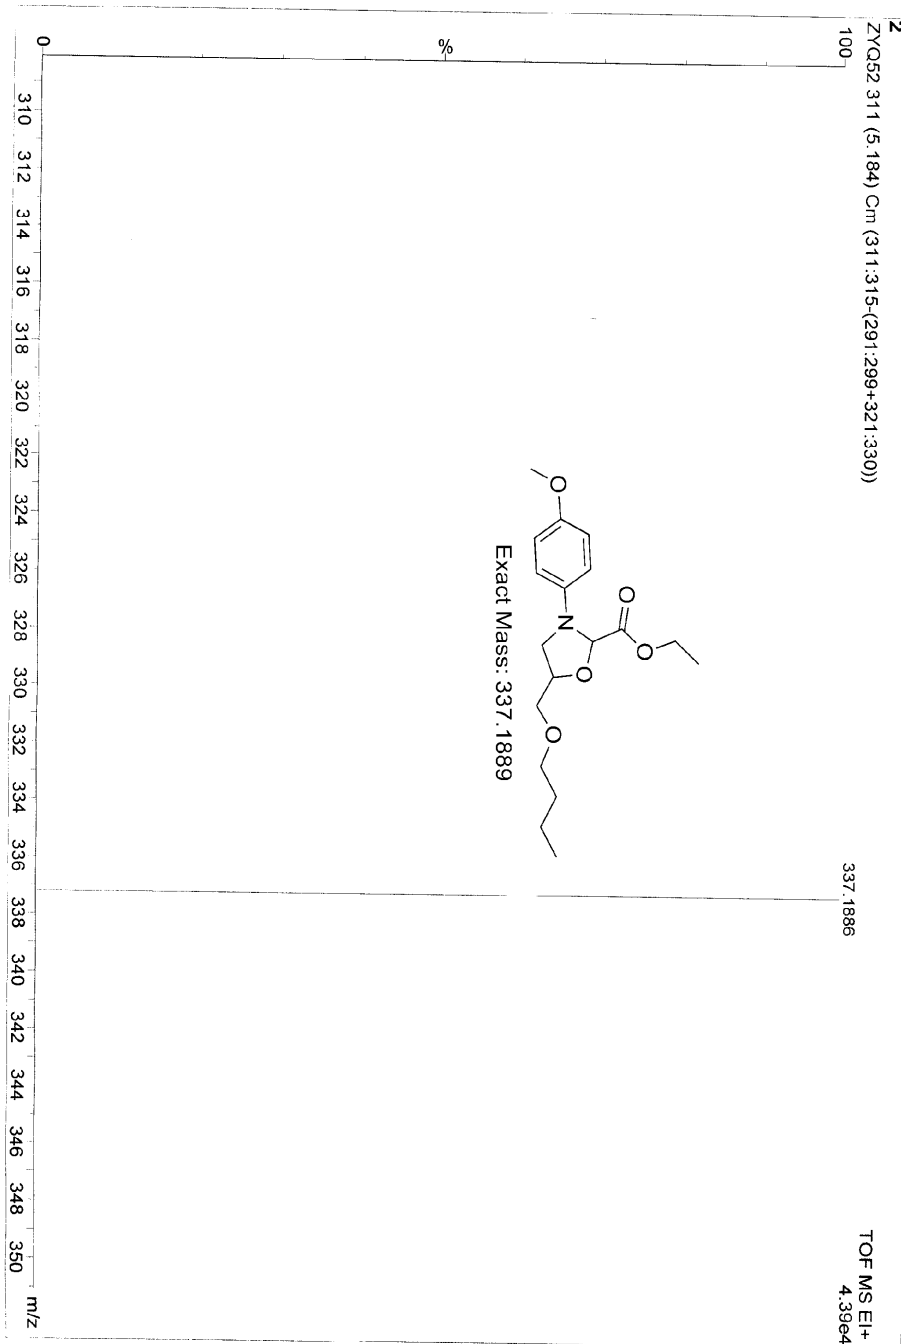

**Figure S19.** HRMS spectrum of product **3e**.

**Table S5.** HPLC analysis of product **3e**.

| Column       | CHIRALCEL OD-H(ODH0CE-LA084)             |
|--------------|------------------------------------------|
| Column size  | 0.46 cm I.D.*25 cm L                     |
| Injection    | 20 $\mu$ L                               |
| Mobile phase | <i>n</i> -Hexane/2-propanol = 95/5 (v/v) |
| Flow rate    | 0.5 mL/min                               |
| Wave length  | UV 254 nm                                |
| Temperature  | 25 $^{\circ}$ C                          |
| Solvents     | Hexane, 2-propanol: HPLC grade           |

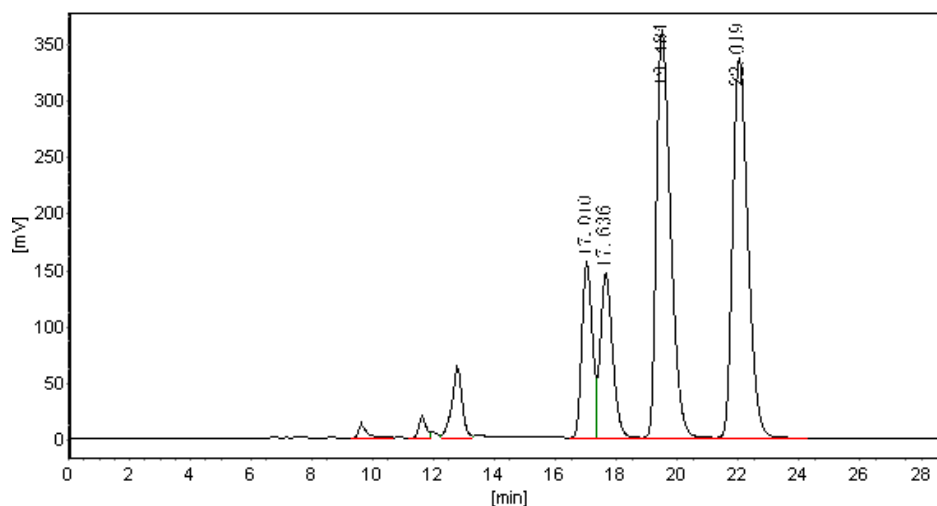

| Peak NO. | Time   | Height | Area     | Area % |
|----------|--------|--------|----------|--------|
| 1        | 17.010 | 154262 | 3744466  | 12.00  |
| 2        | 17.636 | 144841 | 4065326  | 13.03  |
| 3        | 19.484 | 359199 | 11692550 | 37.48  |
| 4        | 22.019 | 335271 | 11693701 | 37.49  |

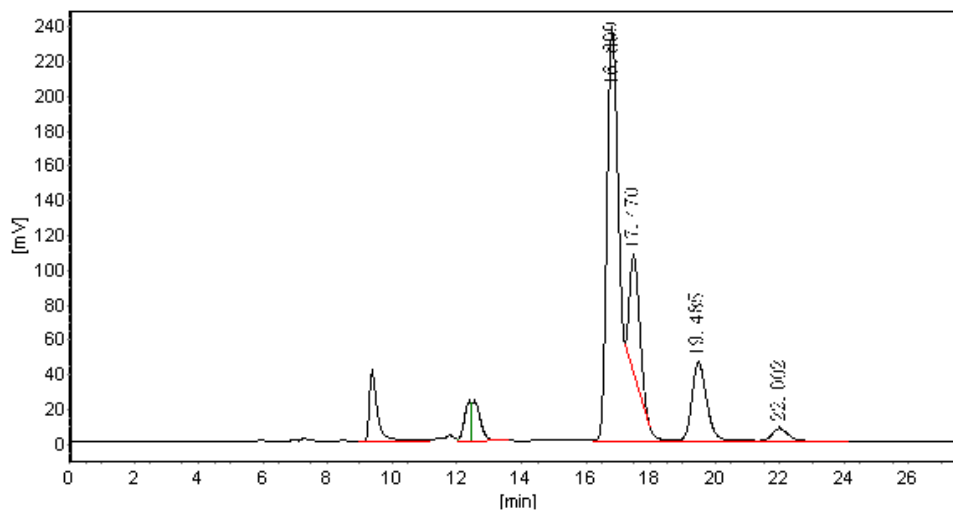

| Peak NO. | Time   | Height | Area    | Area % |
|----------|--------|--------|---------|--------|
| 1        | 16.809 | 235497 | 7498214 | 70.79  |
| 2        | 17.470 | 66225  | 1421288 | 13.42  |
| 3        | 19.485 | 45011  | 1429110 | 13.49  |
| 4        | 22.002 | 6986   | 242711  | 2.30   |

Figure S20. Cont.

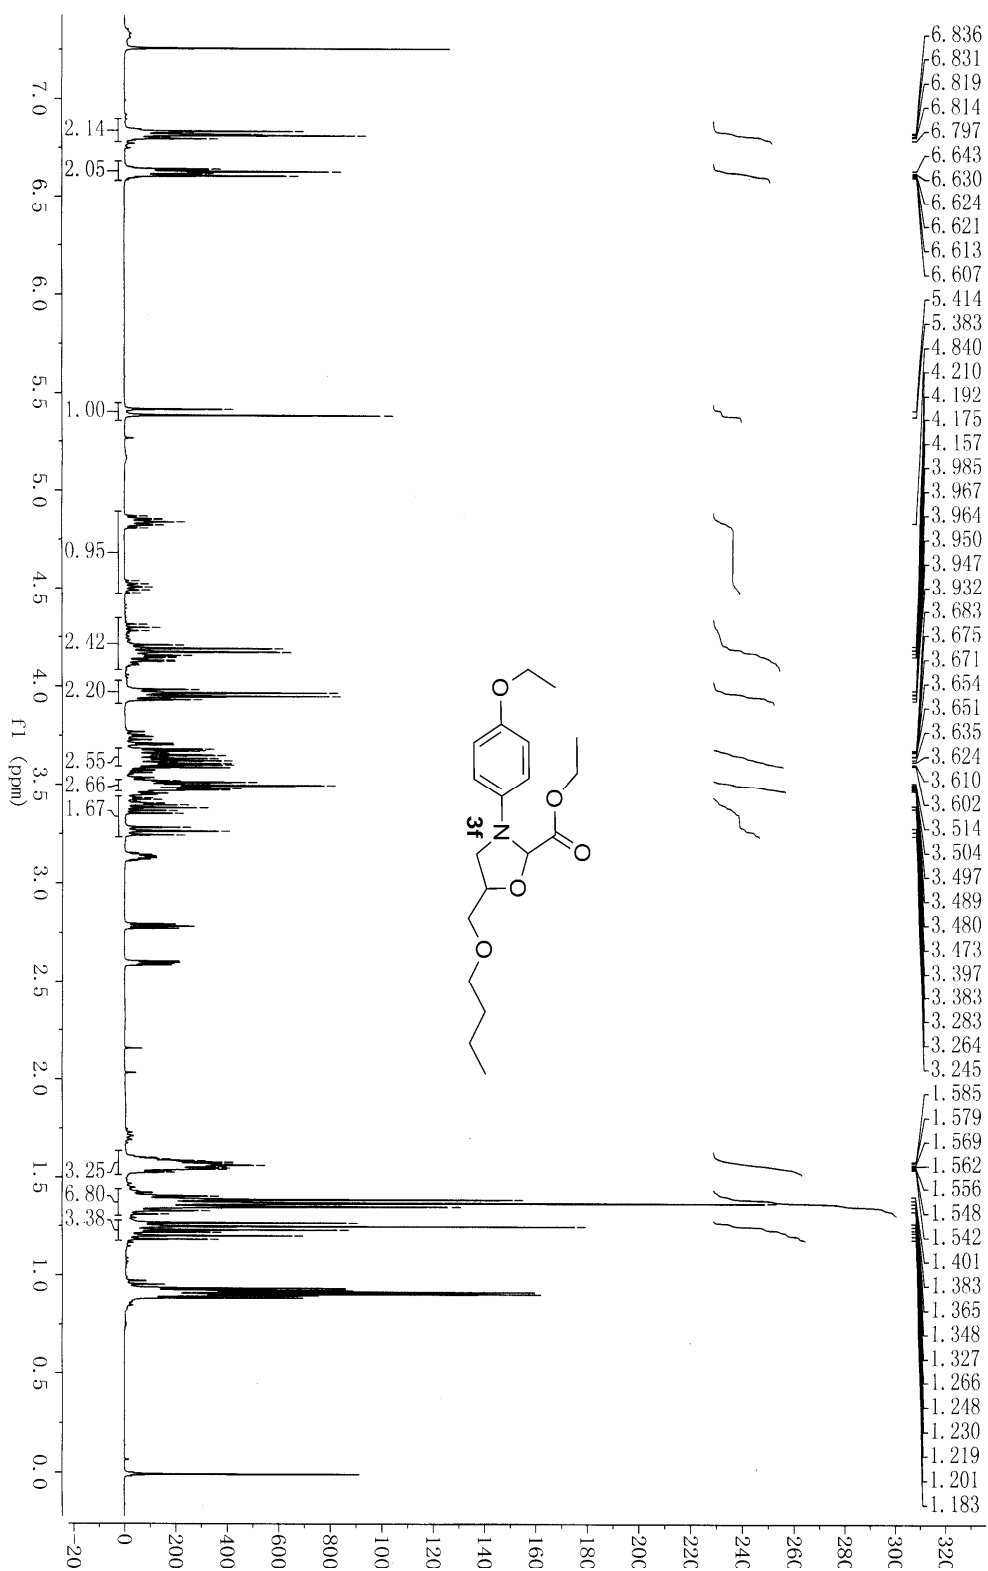

Figure S20. <sup>1</sup>H-NMR spectrum of product **3f**.

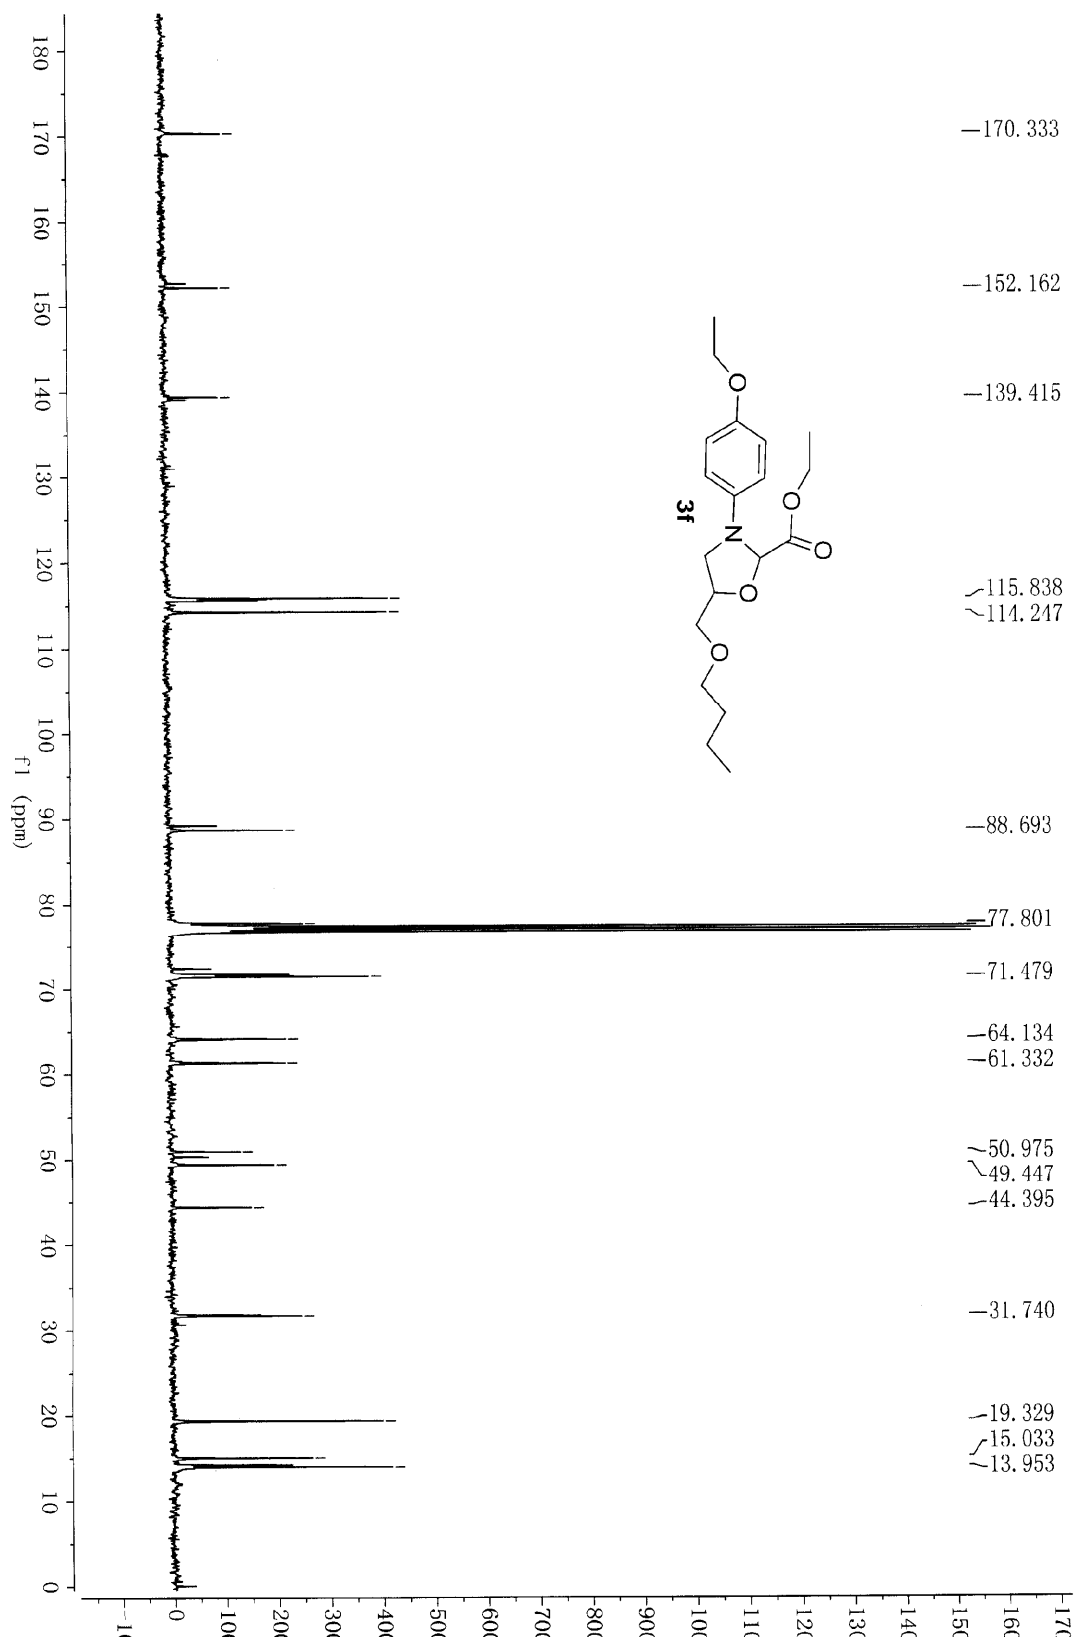

Figure S21.  $^{13}\text{C}$ -NMR spectrum of product **3f**.



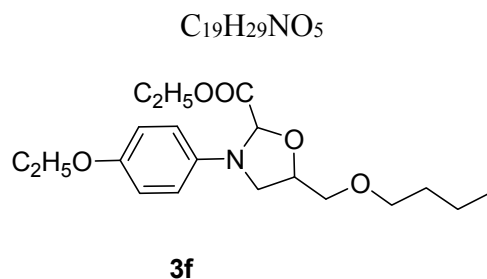

**3f.**  $C_{19}H_{29}NO_5$  **HRMS** (ESI<sup>+</sup>) exact mass calculated for  $[M + Na]^+$  requires  $m/z$  374.1944, found  $m/z$  374.1935.

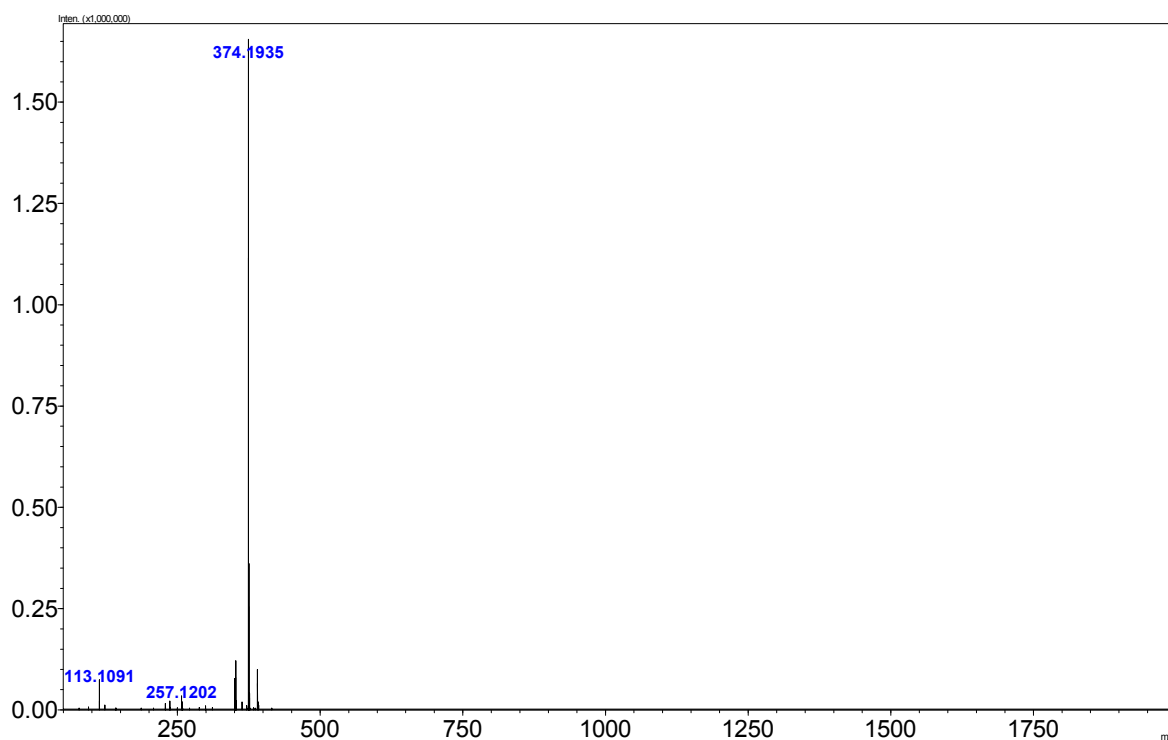

**Figure S22.** HRMS spectrum of product **3f**.

**Table S6.** HPLC analysis of product **3f**.

| Column       | CHIRALCEL OD-H(ODH0CE-LA084)             |
|--------------|------------------------------------------|
| Column size  | 0.46 cm I.D.*25 cm L                     |
| Injection    | 20 $\mu$ L                               |
| Mobile phase | <i>n</i> -Hexane/2-propanol = 95/5 (v/v) |
| Flow rate    | 1.0 mL/min                               |
| Wave length  | UV 254 nm                                |
| Temperature  | 25 $^{\circ}$ C                          |
| Solvents     | Hexane, 2-propanol: HPLC grade           |

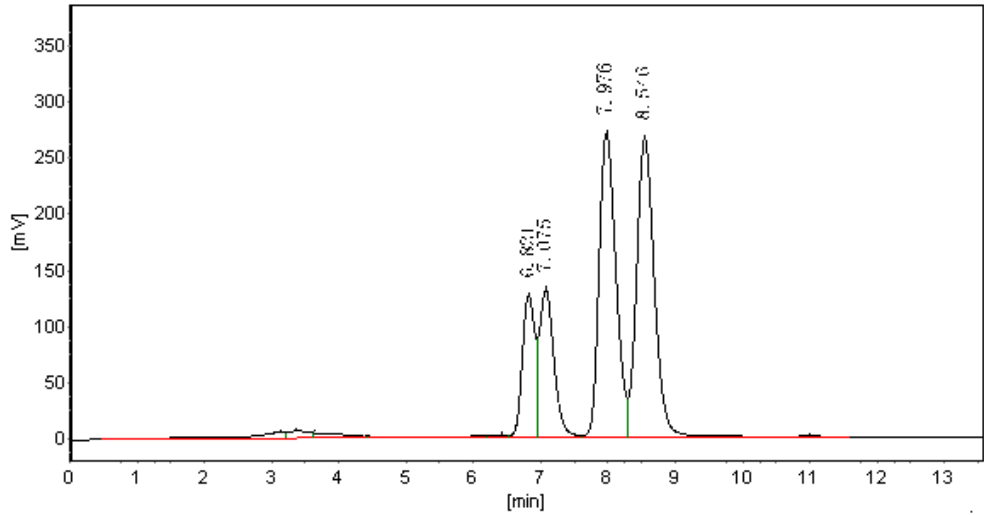

| Peak NO. | Time  | Height | Area    | Area % |
|----------|-------|--------|---------|--------|
| 1        | 6.821 | 126366 | 1579316 | 11.93  |
| 2        | 7.075 | 131640 | 2007824 | 15.17  |
| 3        | 7.976 | 271027 | 4695282 | 35.47  |
| 4        | 8.546 | 266883 | 4955090 | 37.43  |

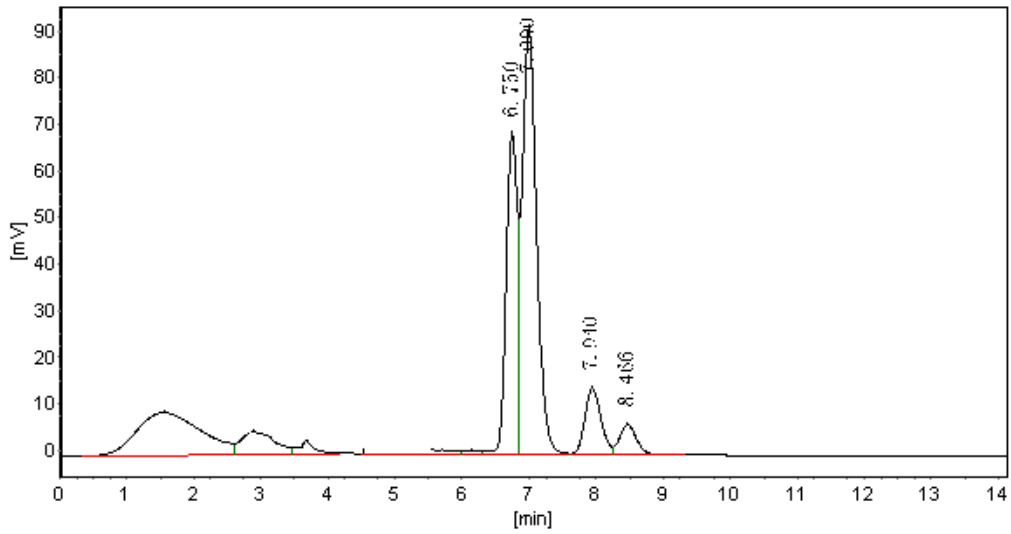

| Peak NO. | Time  | Height | Area    | Area % |
|----------|-------|--------|---------|--------|
| 1        | 6.750 | 68622  | 806312  | 32.11  |
| 2        | 7.000 | 91562  | 1349758 | 53.73  |
| 3        | 7.940 | 14209  | 238947  | 9.52   |
| 4        | 8.466 | 6420   | 116979  | 4.64   |

Figure S23. Cont.

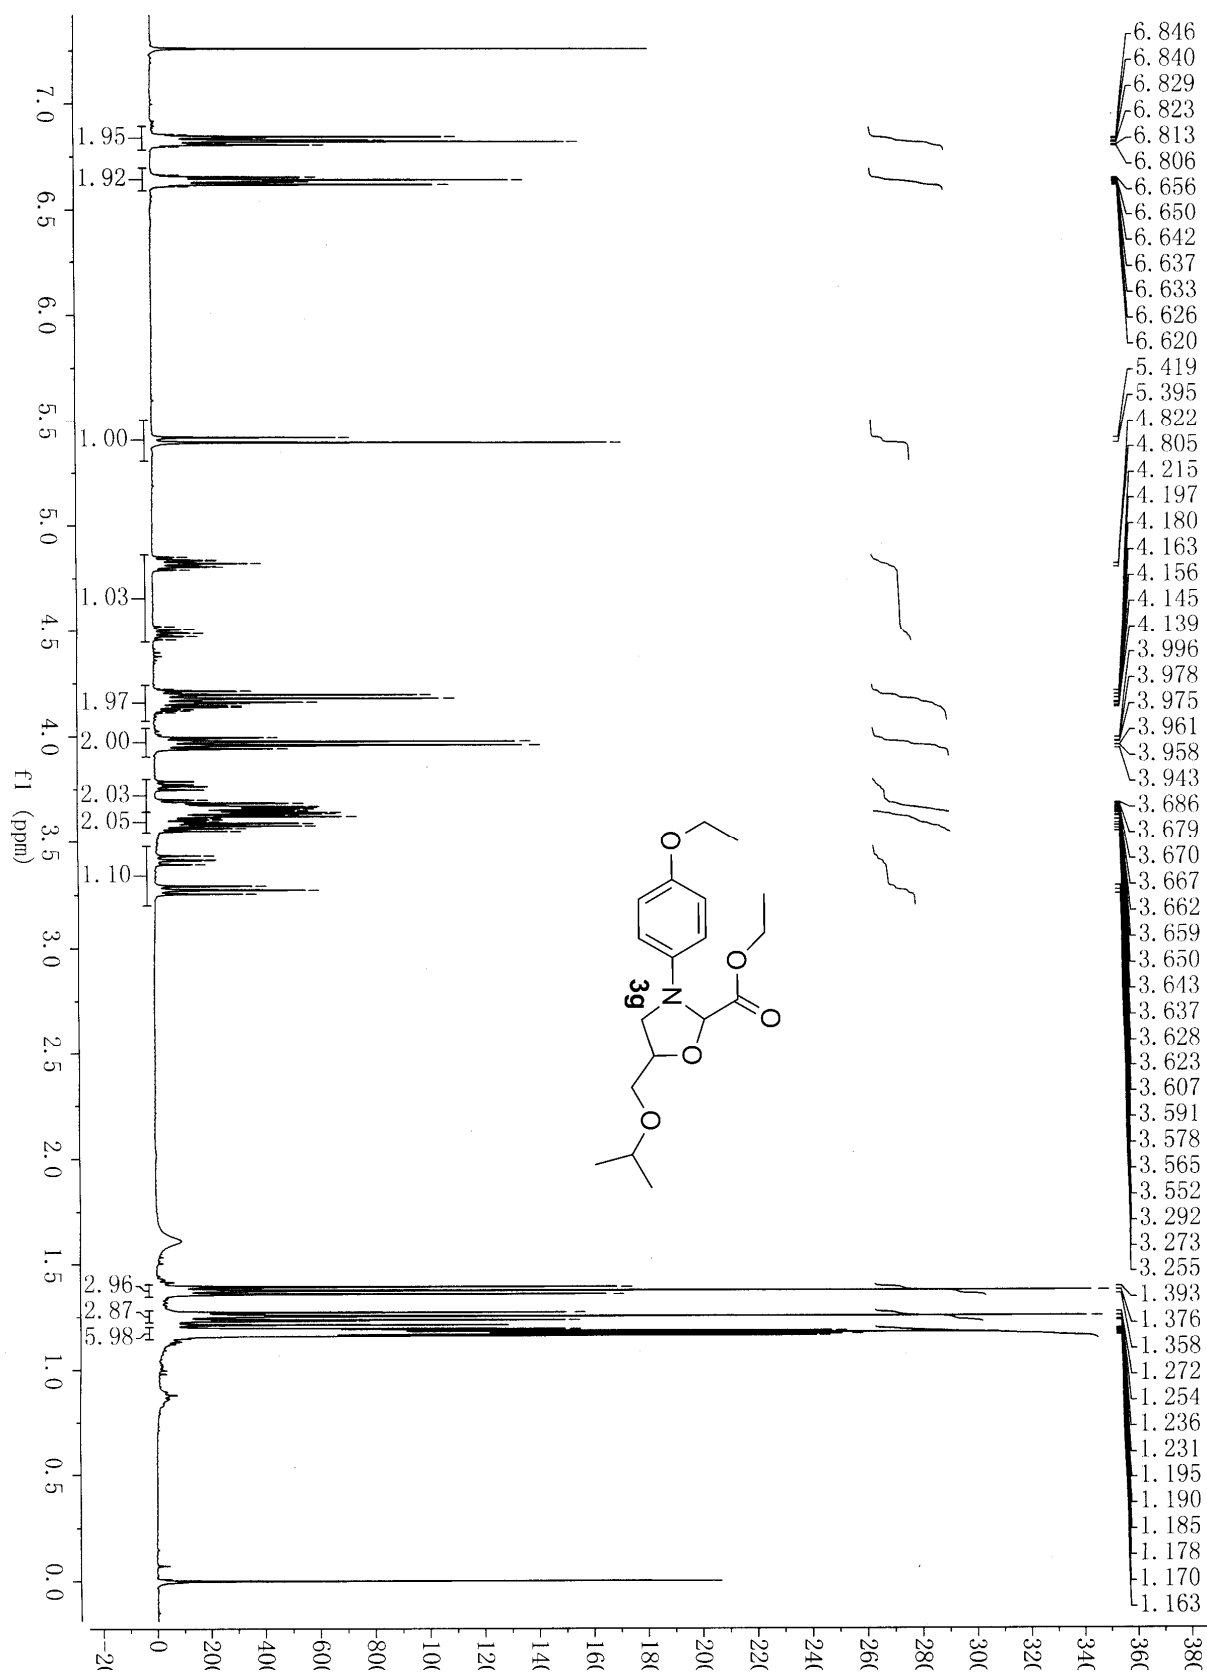

Figure S23. <sup>1</sup>H-NMR spectrum of product **3g**.

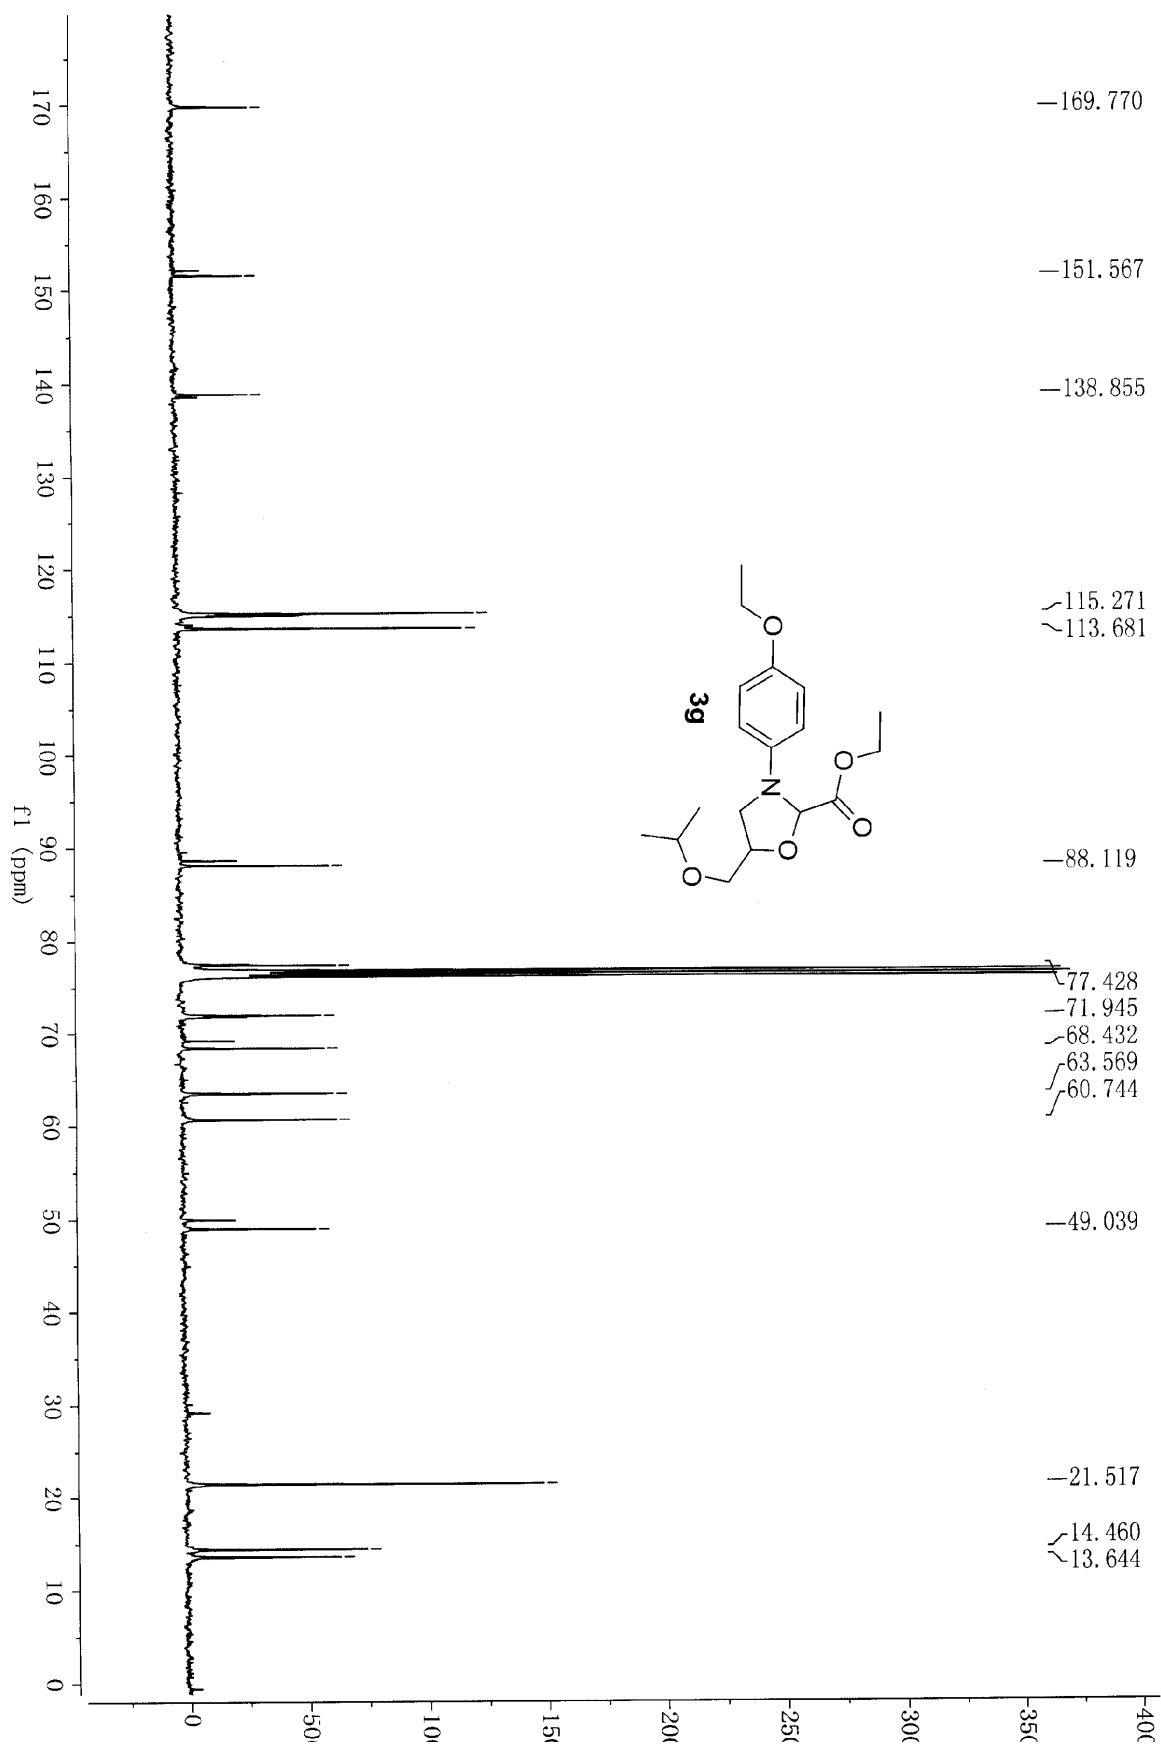

Figure S24.  $^{13}\text{C}$ -NMR spectrum of product **3g**.

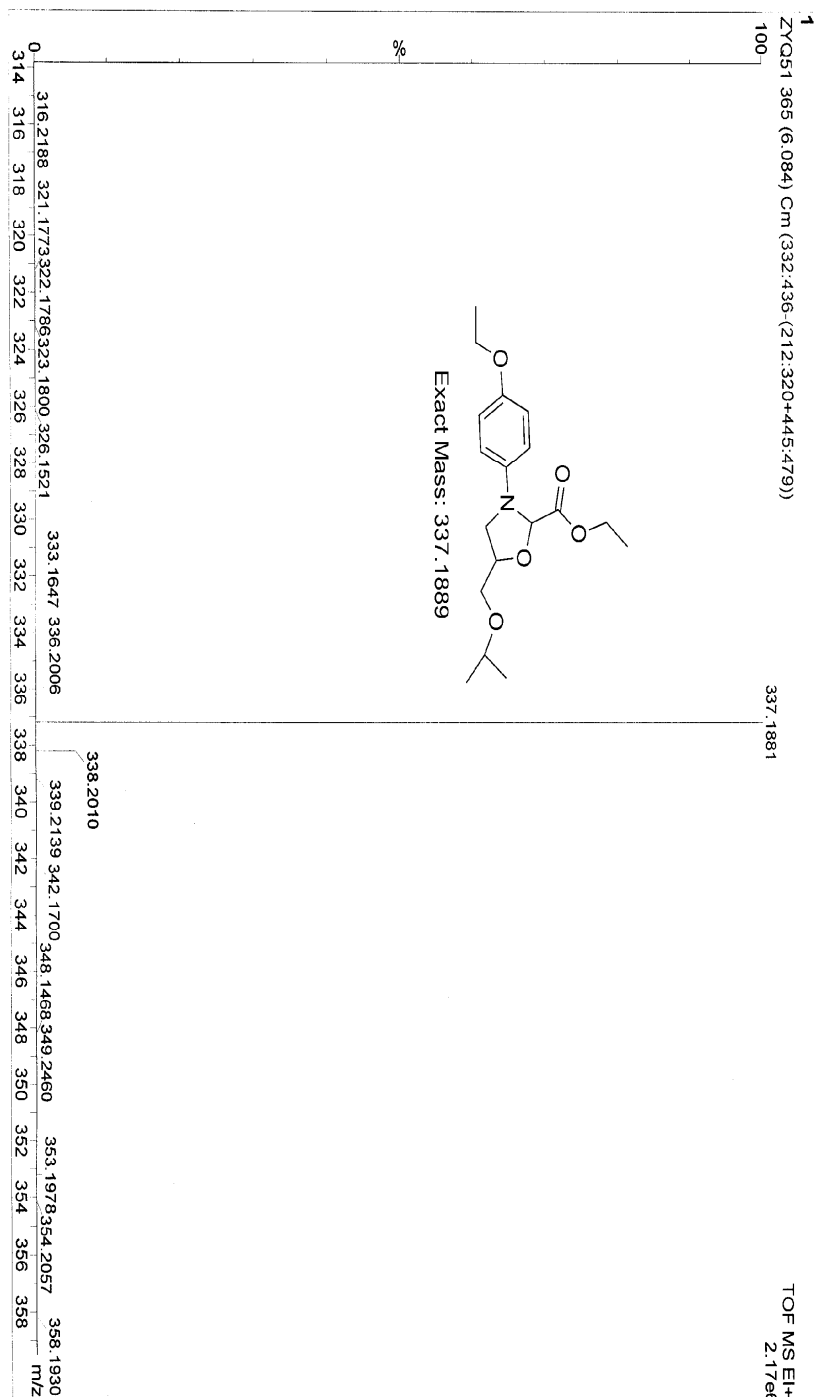

**Figure S25.** HRMS spectrum of product **3g**.

**Table S7.** HPLC analysis of product **3g**.

| Column       | CHIRALCEL OD-H(ODH0CE-LA084)             |
|--------------|------------------------------------------|
| Column size  | 0.46 cm I.D.*25 cm L                     |
| Injection    | 20 $\mu$ L                               |
| Mobile phase | <i>n</i> -Hexane/2-propanol = 95/5 (v/v) |
| Flow rate    | 1.0 mL/min                               |
| Wave length  | UV 254 nm                                |
| Temperature  | 25 $^{\circ}$ C                          |
| Solvents     | Hexane, 2-propanol: HPLC grade           |

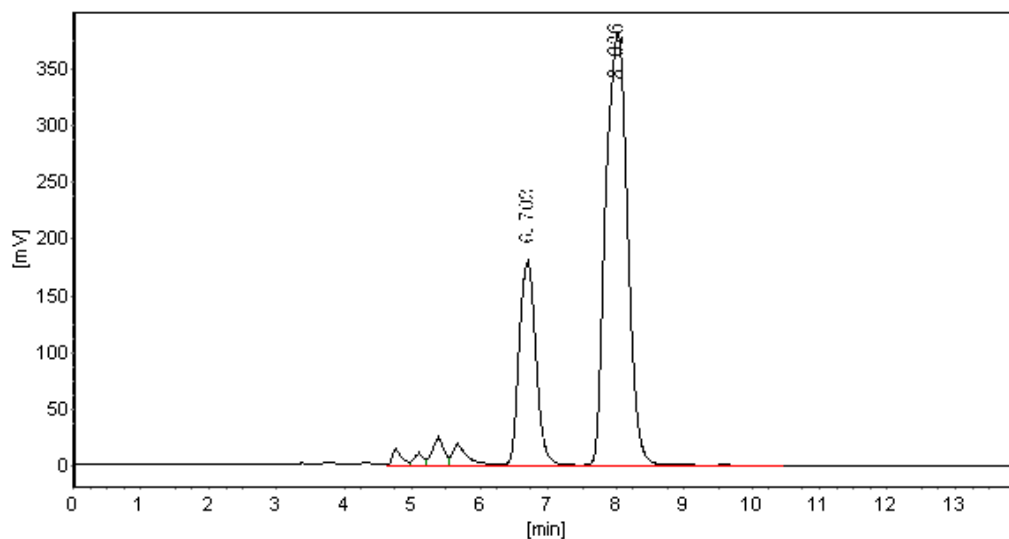

| Peak NO. | Time  | Height | Area    | Area % |
|----------|-------|--------|---------|--------|
| 1        | 6.702 | 178710 | 3079137 | 26.59  |
| 2        | 8.026 | 380203 | 8504169 | 73.41  |

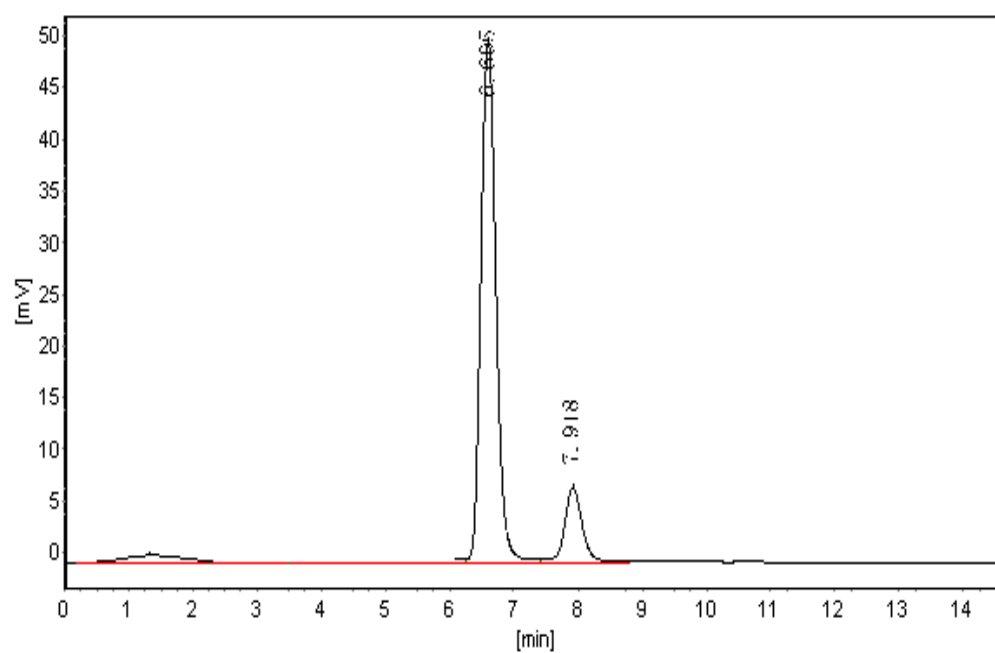

| Peak NO. | Time  | Height | Area    | Area % |
|----------|-------|--------|---------|--------|
| 1        | 6.585 | 93190  | 1513932 | 85.7   |
| 2        | 7.897 | 13316  | 252162  | 14.3   |

Figure S26. *Cont.*

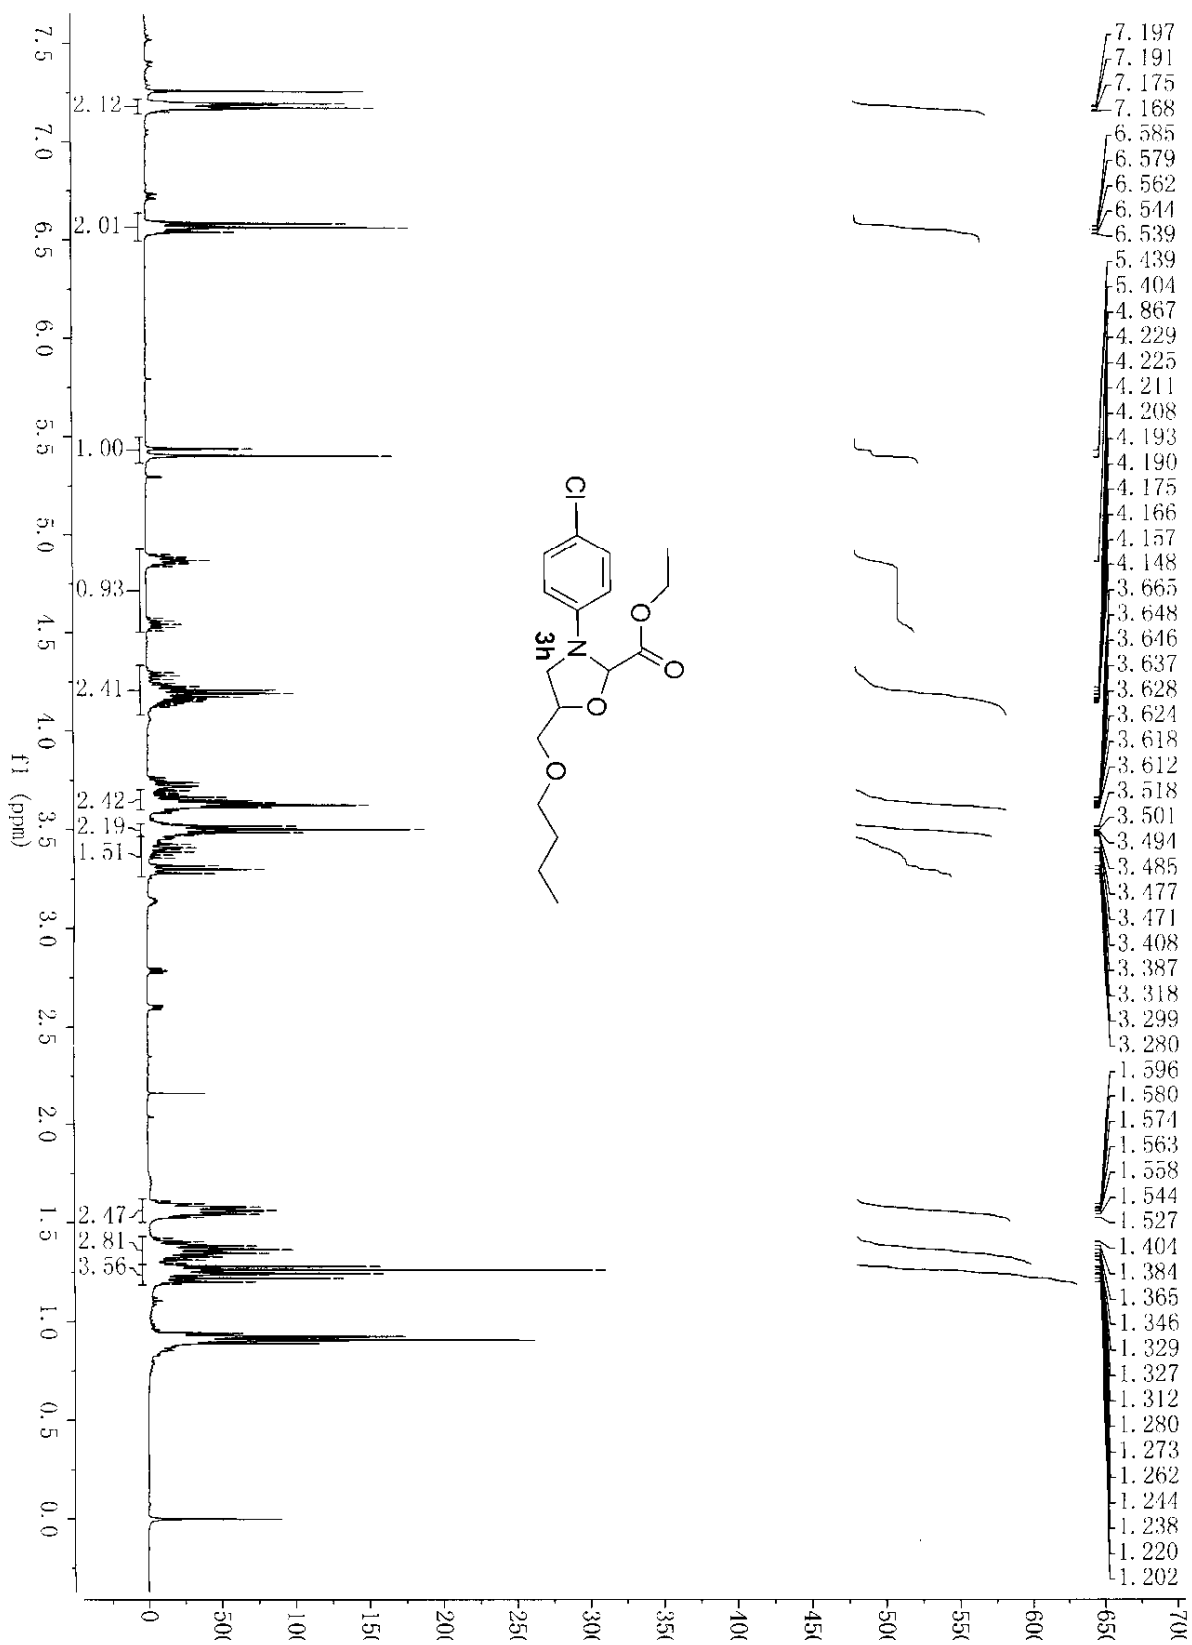

Figure S26.  $^1\text{H-NMR}$  spectrum of product **3h**.

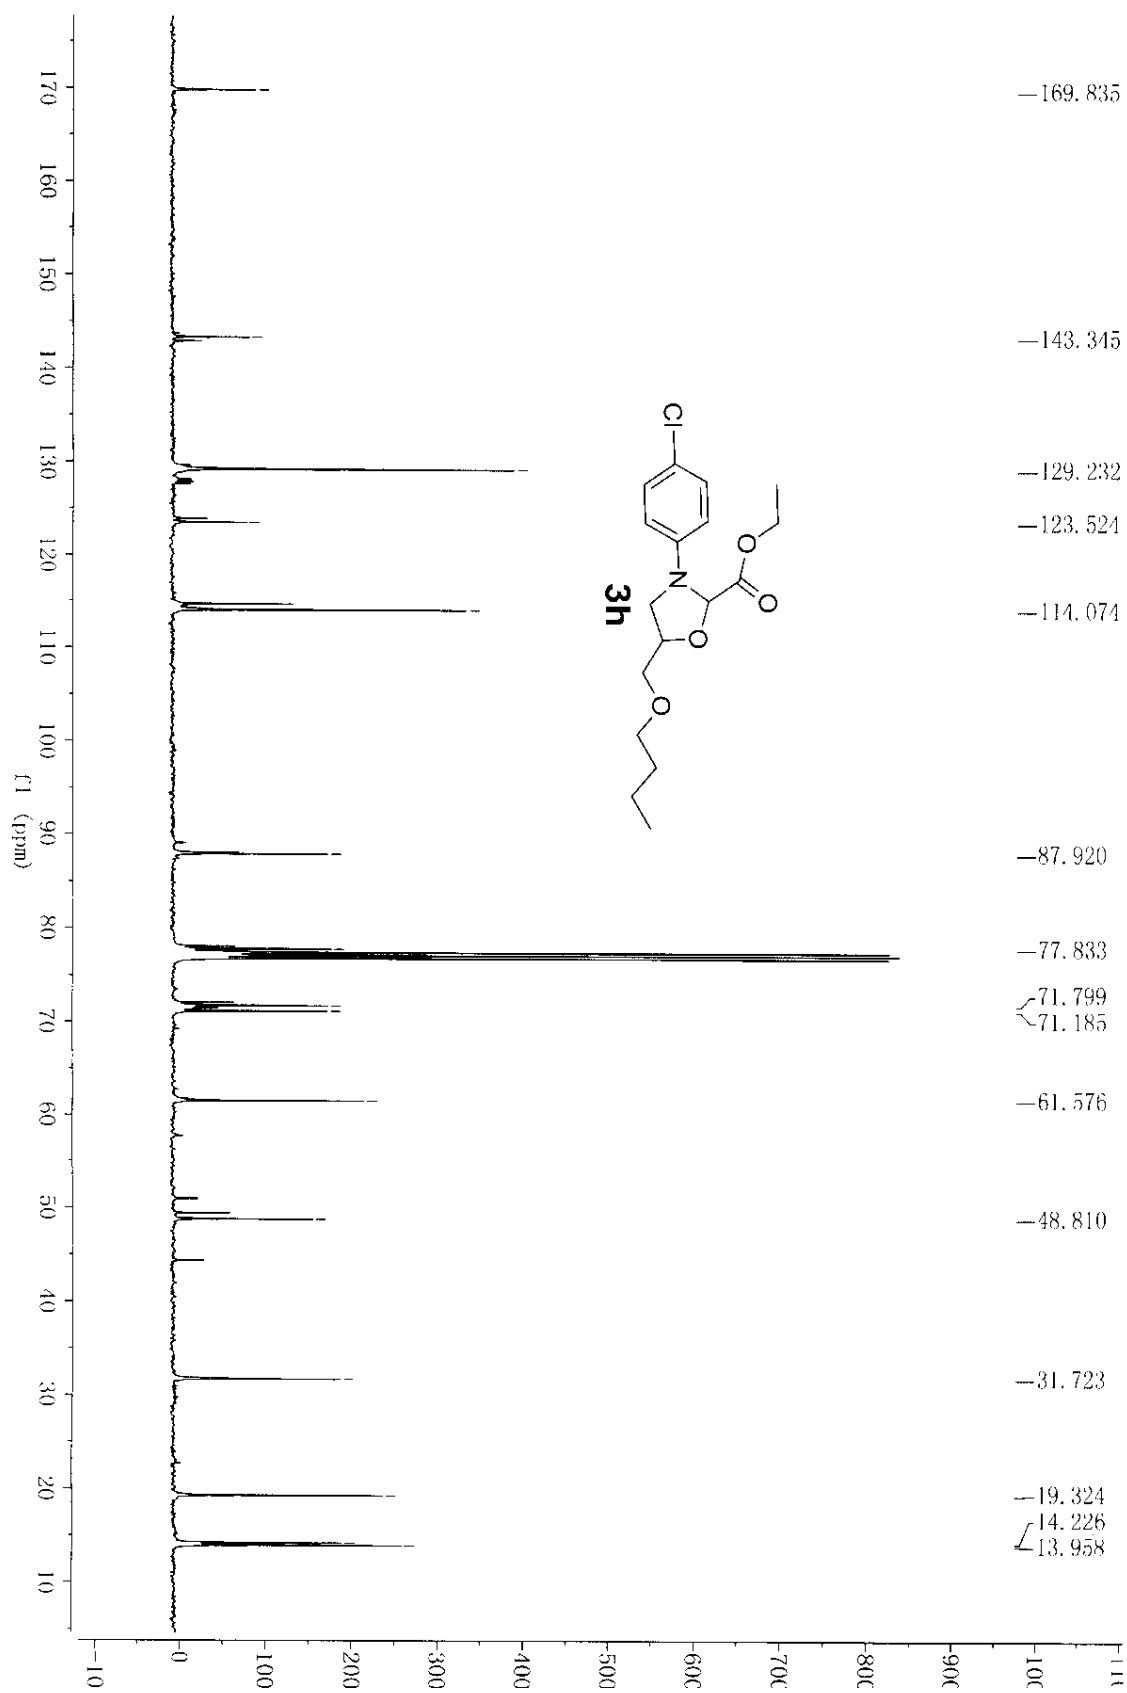

Figure S27.  $^{13}\text{C}$ -NMR spectrum of product **3h**.



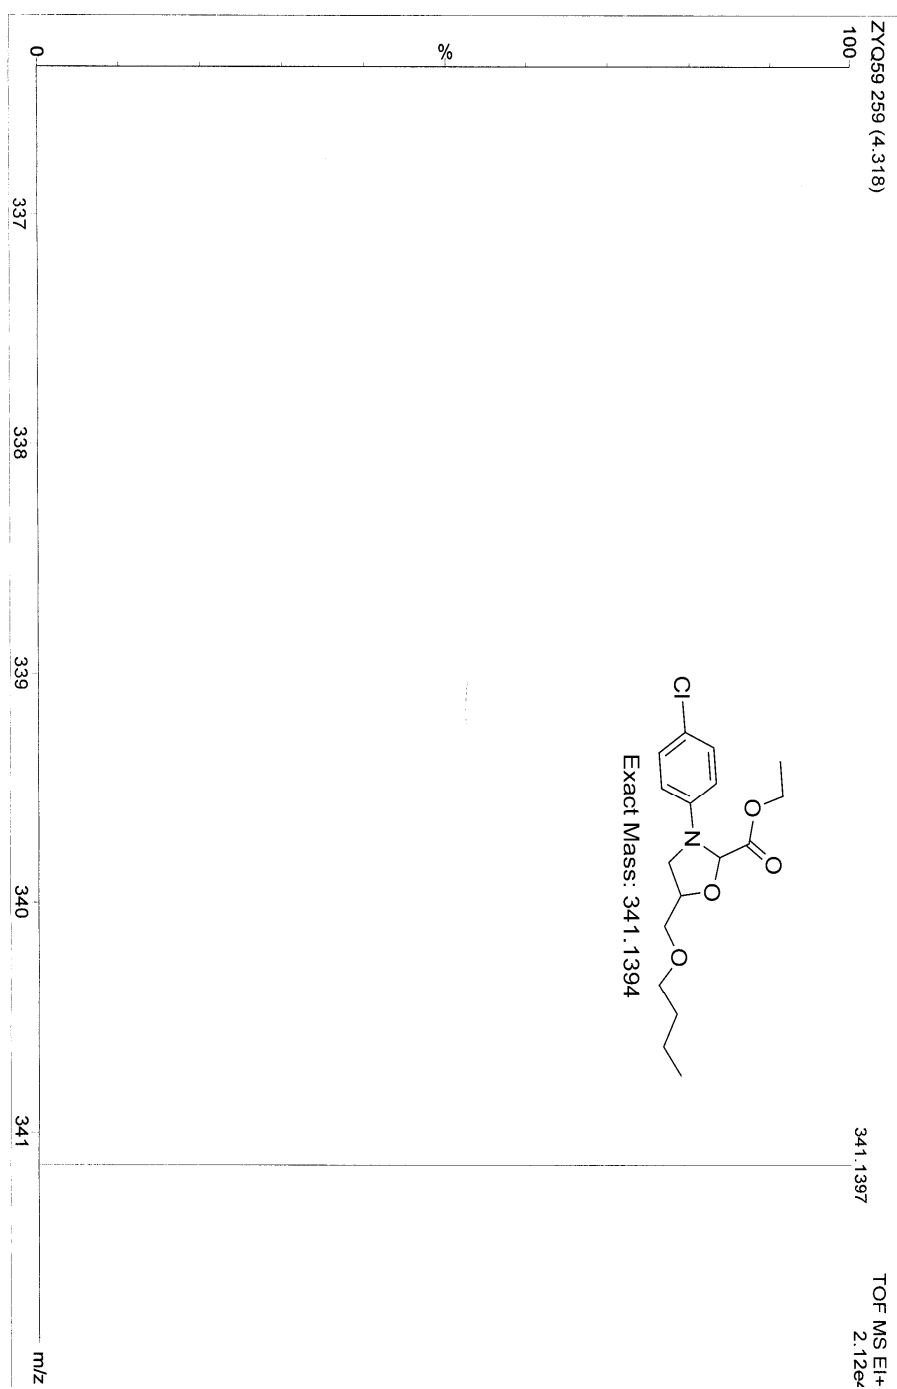

**Figure S28.** HRMS spectrum of product **3h**.

**Table S8.** HPLC analysis of product **3h**.

| Column       | CHIRALCEL OD-H(ODH0CE-LA084)             |
|--------------|------------------------------------------|
| Column size  | 0.46 cm I.D.*25 cm L                     |
| Injection    | 20 $\mu$ L                               |
| Mobile phase | <i>n</i> -Hexane/2-propanol = 95/5 (v/v) |
| Flow rate    | 1.0 mL/min                               |
| Wave length  | UV 254 nm                                |
| Temperature  | 25 $^{\circ}$ C                          |
| Solvents     | Hexane, 2-propanol: HPLC grade           |

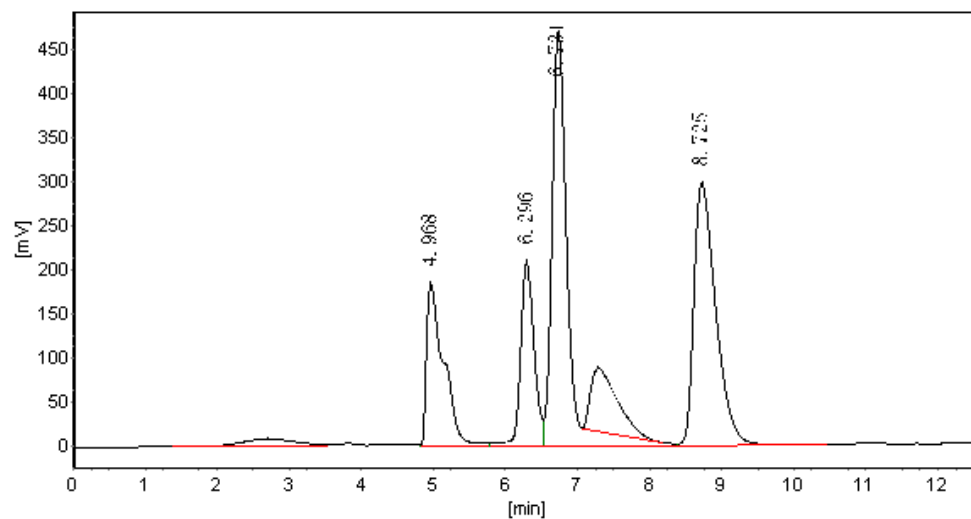

| Peak NO. | Time  | Height | Area    | Area % |
|----------|-------|--------|---------|--------|
| 1        | 4.968 | 183302 | 3043118 | 16.52  |
| 2        | 6.296 | 208548 | 2630844 | 13.66  |
| 3        | 6.731 | 468928 | 7144385 | 37.12  |
| 4        | 8.725 | 297325 | 6294946 | 32.70  |

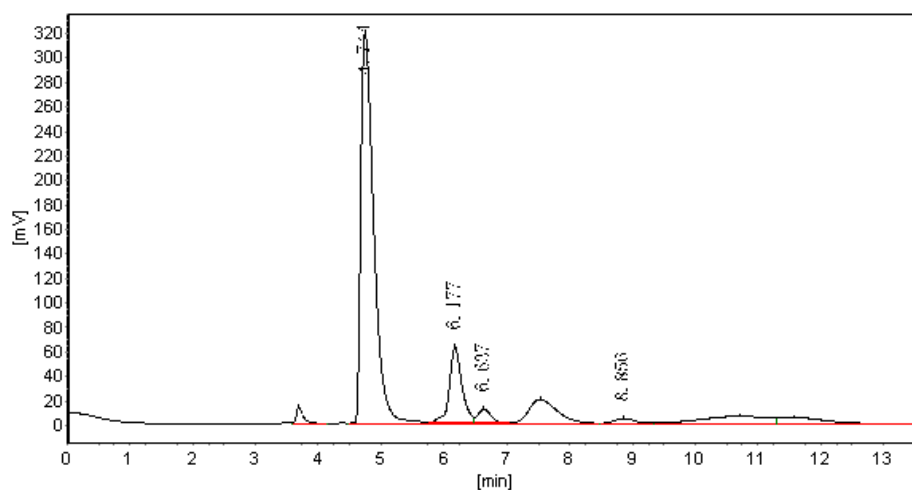

| Peak NO. | Time  | Height | Area    | Area % |
|----------|-------|--------|---------|--------|
| 1        | 4.744 | 318552 | 4673525 | 80.79  |
| 2        | 6.177 | 61621  | 844018  | 14.59  |
| 3        | 6.637 | 11124  | 154946  | 2.68   |
| 4        | 8.856 | 4477   | 112447  | 1.94   |

Figure S29. Cont.

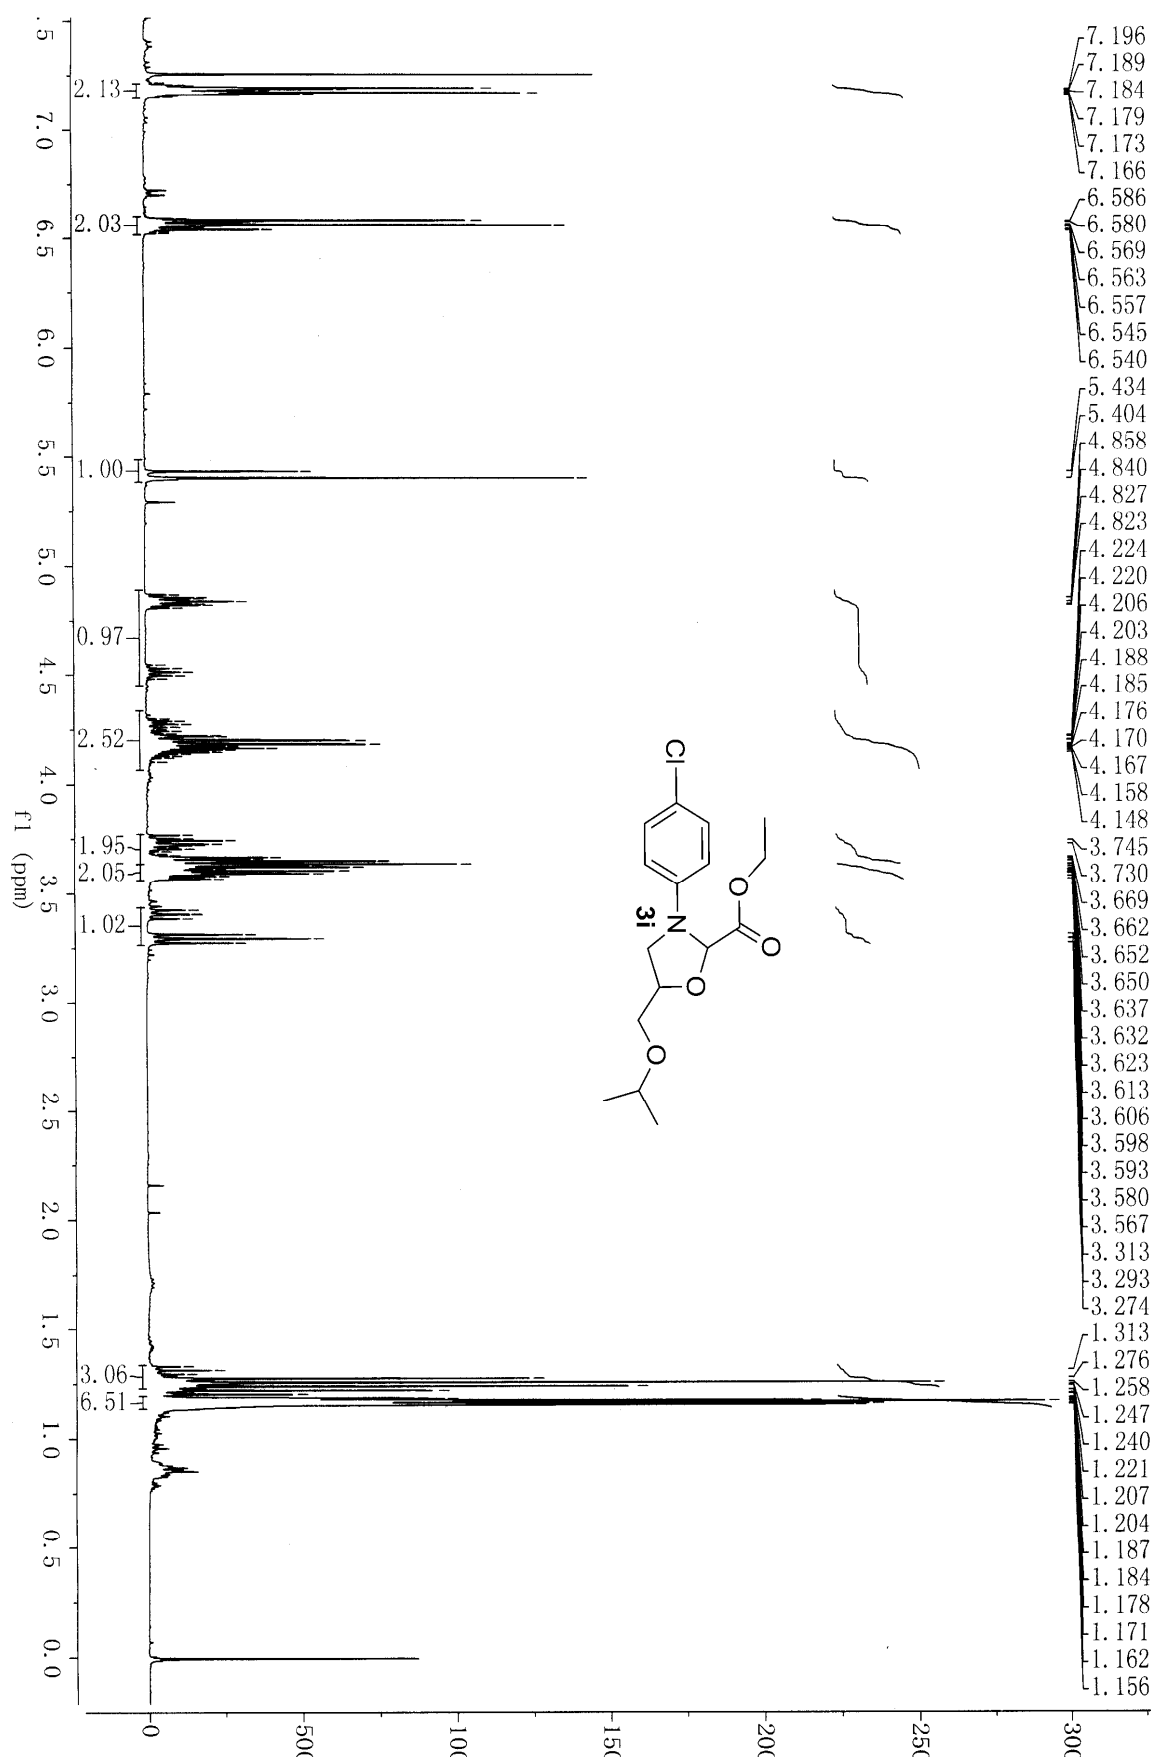

Figure S29. <sup>1</sup>H-NMR spectrum of product **3i**.

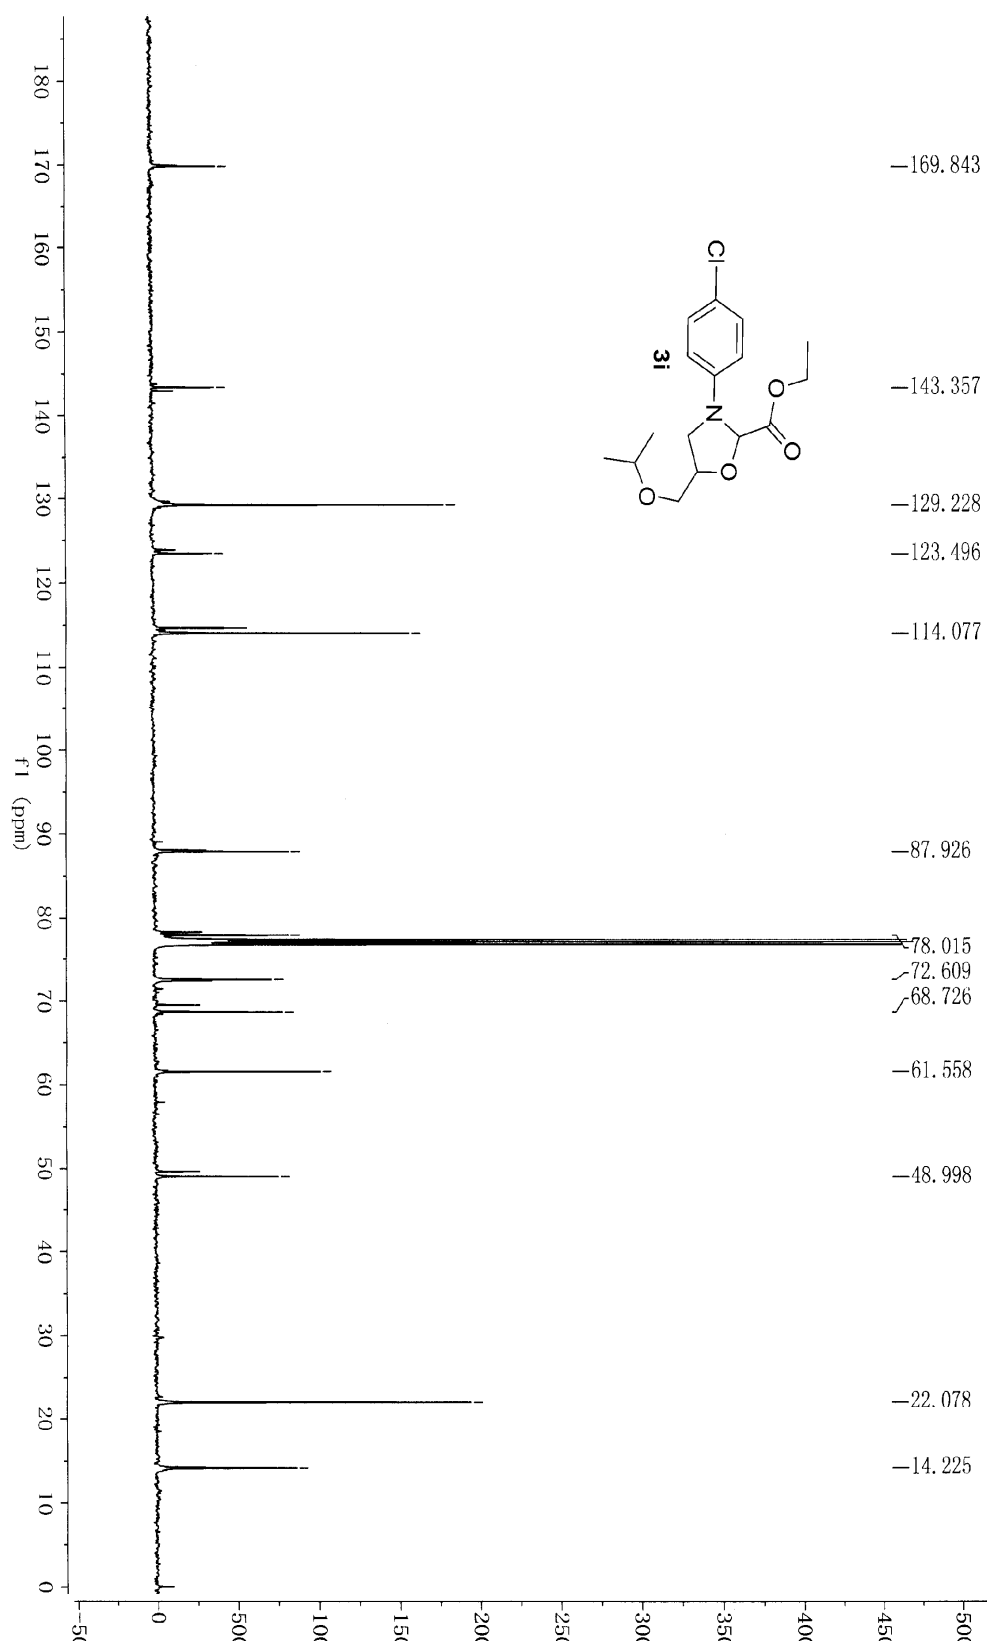

Figure S30.  $^{13}\text{C-NMR}$  spectrum of product **3i**.

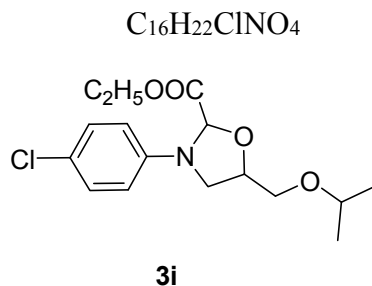

**3i:**  $C_{16}H_{22}ClNO_4$  HRMS (ESI<sup>+</sup>) exact mass calculated for  $[M + Na]^+$  requires  $m/z$  350.1130, found  $m/z$  350.1131.

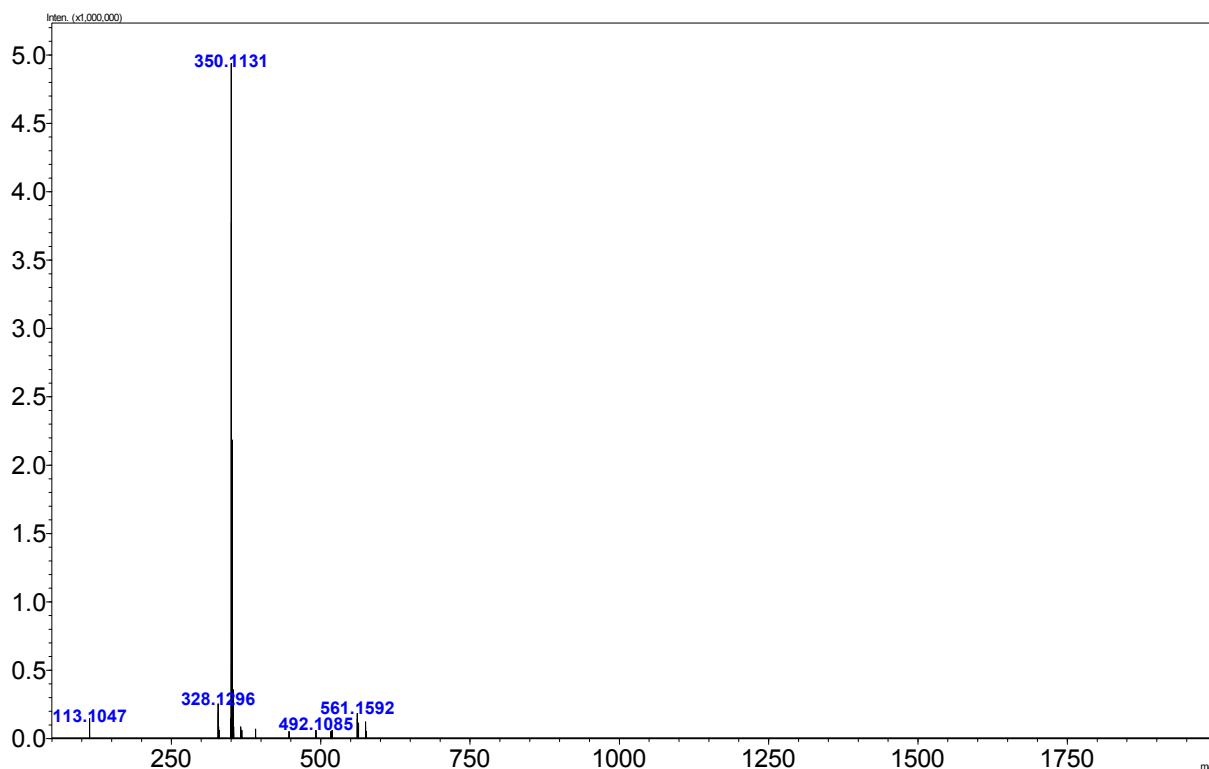

**Figure S31.** HRMS spectrum of product **3i**.

**Table S9.** HPLC analysis of product **3i**.

| Column       | CHIRALCEL OD-H(ODH0CE-LA084)             |
|--------------|------------------------------------------|
| Column size  | 0.46 cm I.D.*25 cm L                     |
| Injection    | 20 $\mu$ L                               |
| Mobile phase | <i>n</i> -Hexane/2-propanol = 95/5 (v/v) |
| Flow rate    | 1.0 mL/min                               |
| Wave length  | UV 254 nm                                |
| Temperature  | 25 $^{\circ}$ C                          |
| Solvents     | Hexane, 2-propanol: HPLC grade           |

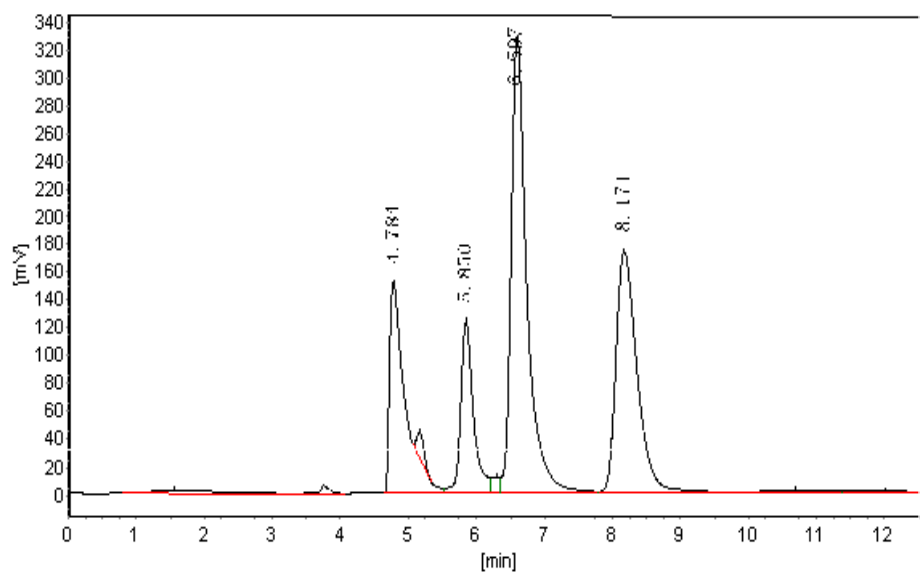

| Peak NO. | Time  | Height | Area    | Area % |
|----------|-------|--------|---------|--------|
| 1        | 4.784 | 150143 | 2384941 | 18.40  |
| 2        | 5.850 | 121948 | 1570749 | 12.12  |
| 3        | 6.597 | 327757 | 5244969 | 40.47  |
| 4        | 8.171 | 174393 | 3759813 | 29.01  |

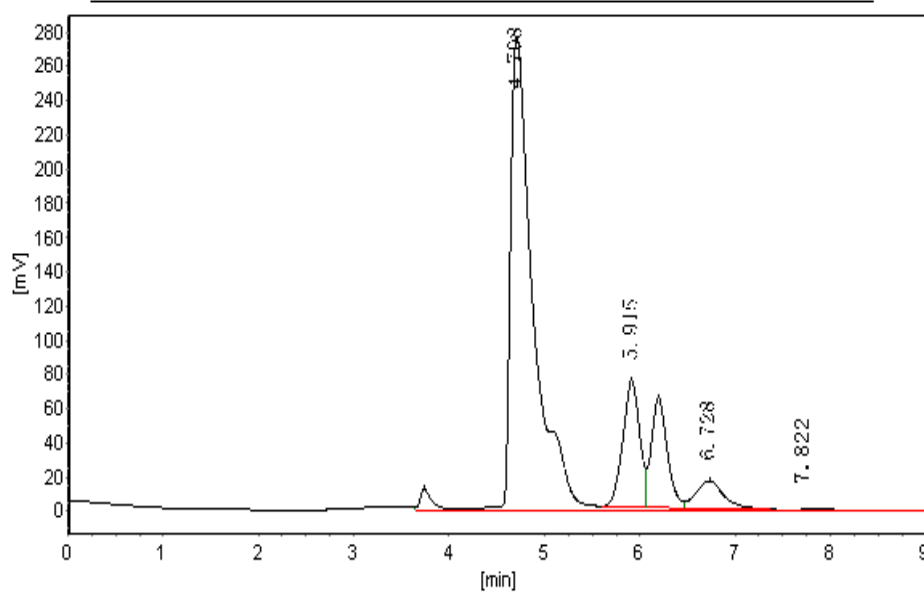

| Peak NO. | Time  | Height | Area    | Area % |
|----------|-------|--------|---------|--------|
| 1        | 4.708 | 276083 | 4713534 | 80.89  |
| 2        | 5.915 | 74044  | 909622  | 15.61  |
| 3        | 6.728 | 16023  | 326582  | 5.60   |
| 4        | 7.822 | 598    | 16699   | 0.29   |

Figure S32. Cont.

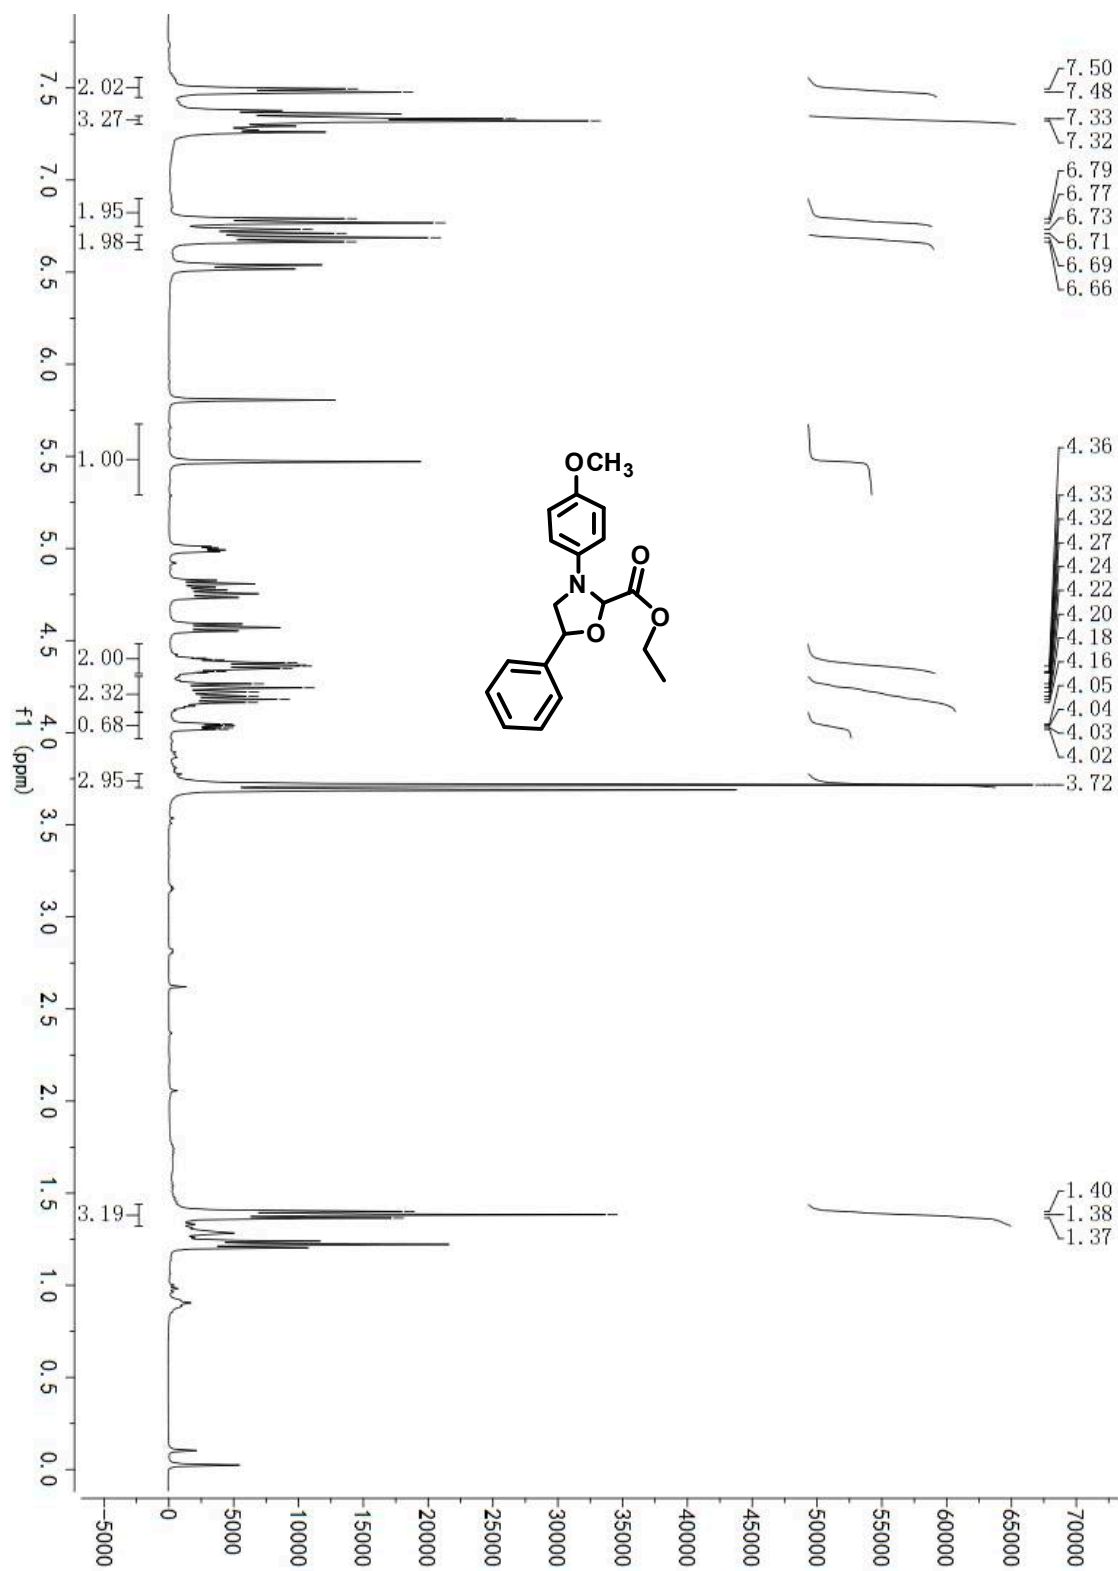

Figure S32. <sup>1</sup>H-NMR spectrum of product **3j**.

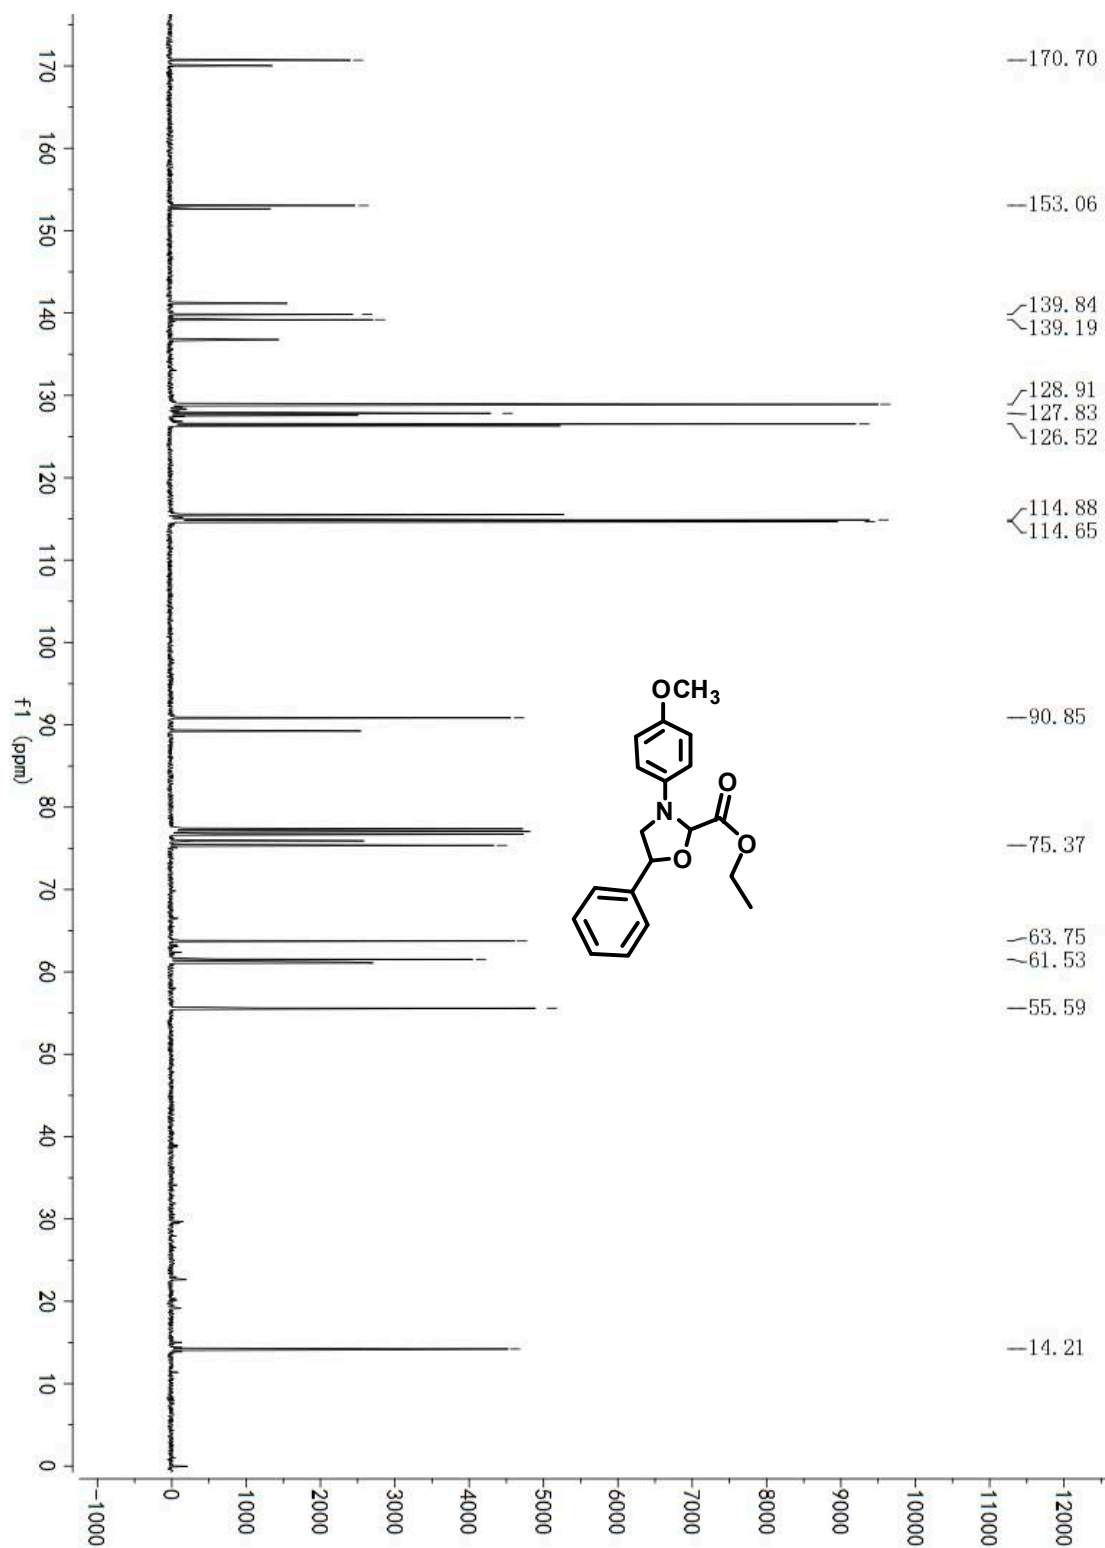

Figure S33.  $^{13}\text{C}$ -NMR spectrum of product **3j**.



## Elemental Composition Report

Page 1

Tolerance = 2.0 mDa / DBE: min = -1.5, max = 50.0  
 Element prediction: Off

Monoisotopic Mass, Odd and Even Electron Ions  
 190 formula(e) evaluated with 1 results within limits (up to 50 closest results for each mass)  
 Elements Used:  
 C: 0-40 H: 0-50 N: 0-3 O: 0-12  
 ZYQ72 553 (9.218) Cm (553:554)  
 TOF MS EI+

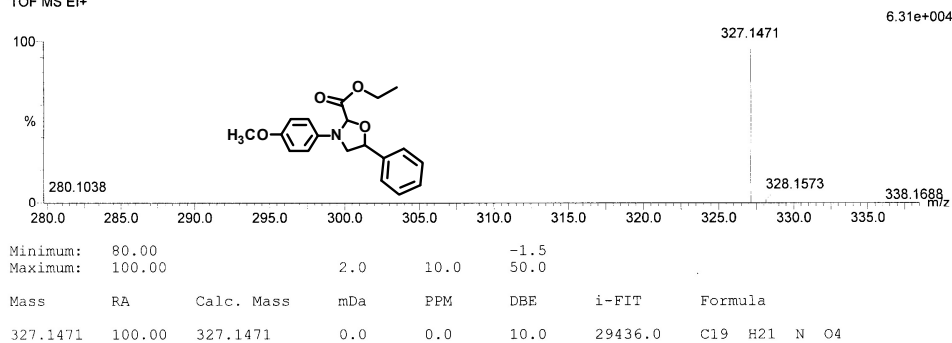

Figure S34. HRMS spectrum of product 3j.

Table S10. HPLC analysis of product 3j.

| Column       | CHIRALCEL OD-H(ODH0CE-LA084)             |
|--------------|------------------------------------------|
| Column size  | 0.46 cm I.D.*25 cm L                     |
| Injection    | 20 $\mu$ L                               |
| Mobile phase | <i>n</i> -Hexane/2-propanol = 99/1 (v/v) |
| Flow rate    | 0.30 mL/min                              |
| Wave length  | UV 254 nm                                |
| Temperature  | 25 $^{\circ}$ C                          |
| Solvents     | Hexane, 2-propanol: HPLC grade           |

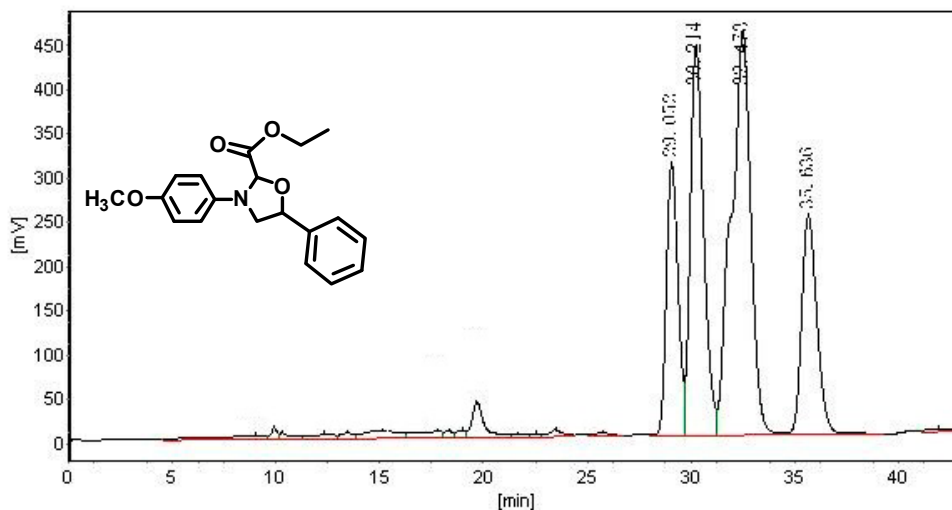

Figure S35. HRMS spectrum of product 3j.

**Table S11.** HPLC analysis of product **3j**.

| Peak NO. | Time   | Height  | Area       | Area% |
|----------|--------|---------|------------|-------|
| 1        | 29.052 | 307,163 | 11,977,399 | 16.07 |
| 2        | 30.214 | 440,021 | 19,850,261 | 26.63 |
| 3        | 32.473 | 456,516 | 30,064,715 | 40.33 |
| 4        | 35.636 | 246,908 | 12,657,319 | 16.97 |

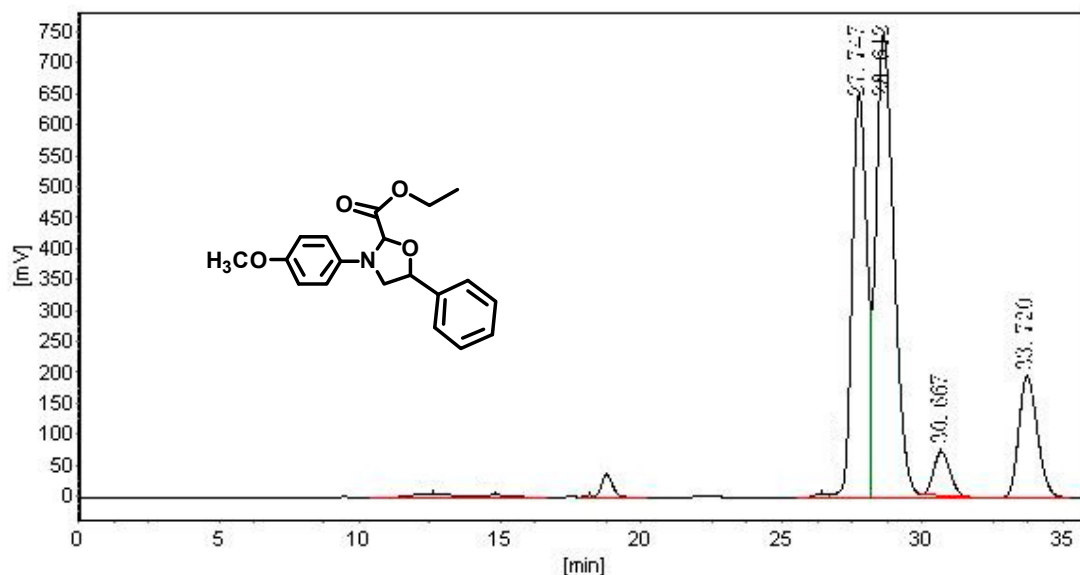**Figure S36.** HRMS spectrum of product **3j**.**Table S12.** HPLC analysis of product **3j**.

| Peak NO. | Time(min) | Height  | Area       | Area% |
|----------|-----------|---------|------------|-------|
| 1        | 27.747    | 652,411 | 23,859,811 | 34.40 |
| 2        | 28.612    | 747,186 | 33,725,572 | 48.62 |
| 3        | 30.667    | 70,090  | 2,814,584  | 4.06  |
| 4        | 33.720    | 194,969 | 8,960,056  | 12.92 |

## 5. HPLC Analysis for Epoxystyrene

**Table S13.** HPLC analysis for epoxystyrene (racemic).

| Column       | CHIRALCEL OD-H(ODH0CE-LA084)             |
|--------------|------------------------------------------|
| Column size  | 0.46 cm I.D.*25 cm L                     |
| Injection    | 20 $\mu$ L                               |
| Mobile phase | <i>n</i> -Hexane/2-propanol = 95/5 (v/v) |
| Flow rate    | 0.5 mL/min                               |
| Wave length  | UV 254 nm                                |
| Temperature  | 25 $^{\circ}$ C                          |
| Solvents     | Hexane, 2-propanol: HPLC grade           |

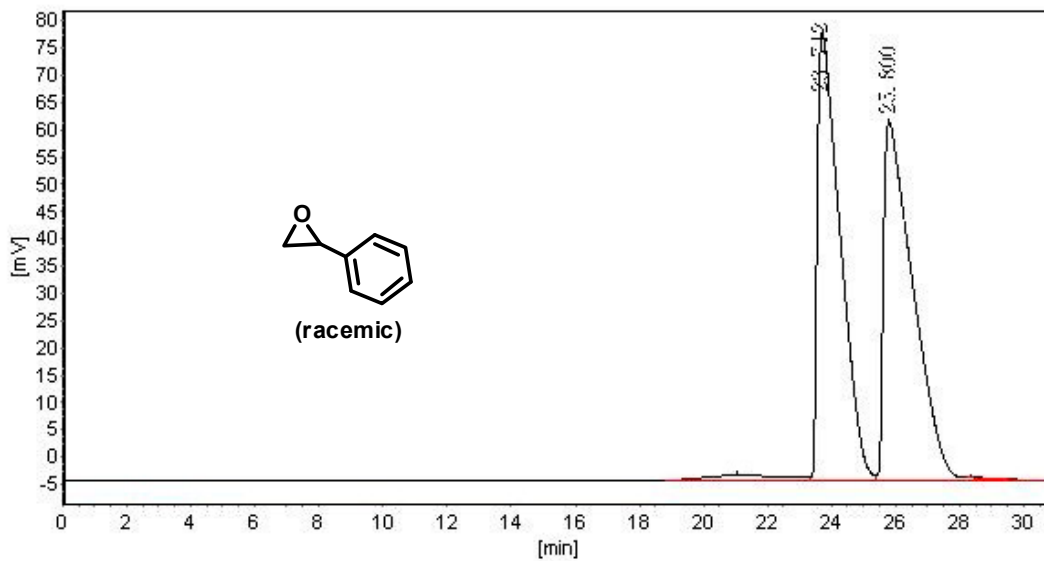

**Figure S37.** HPLC analysis for epoxystyrene (racemic).

**Table S14.** HPLC analysis for epoxystyrene (racemic).

| Peak NO. | Time   | Height | Area      | Area% |
|----------|--------|--------|-----------|-------|
| 1        | 23.712 | 81,939 | 4,057,522 | 49.12 |
| 2        | 25.800 | 65,677 | 4,203,137 | 50.88 |

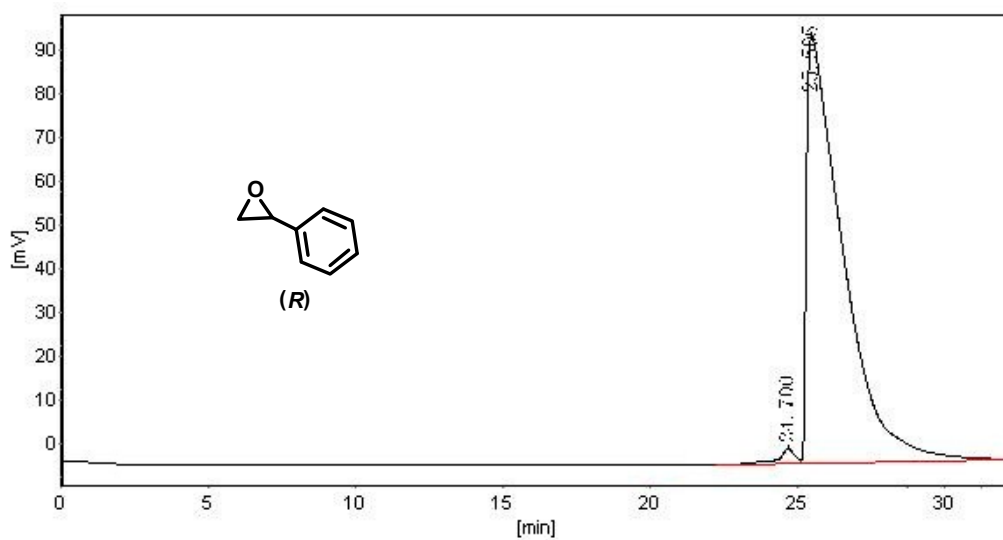

**Figure S38.** HPLC analysis for (*R*)-epoxystyrene.

**Table S15.** HPLC analysis for (*R*)-epoxystyrene.

| Peak NO. | Time   | Height | Area      | Area% |
|----------|--------|--------|-----------|-------|
| 1        | 24.700 | 3302   | 138,449   | 3.25  |
| 2        | 25.505 | 97,642 | 8,387,937 | 96.75 |

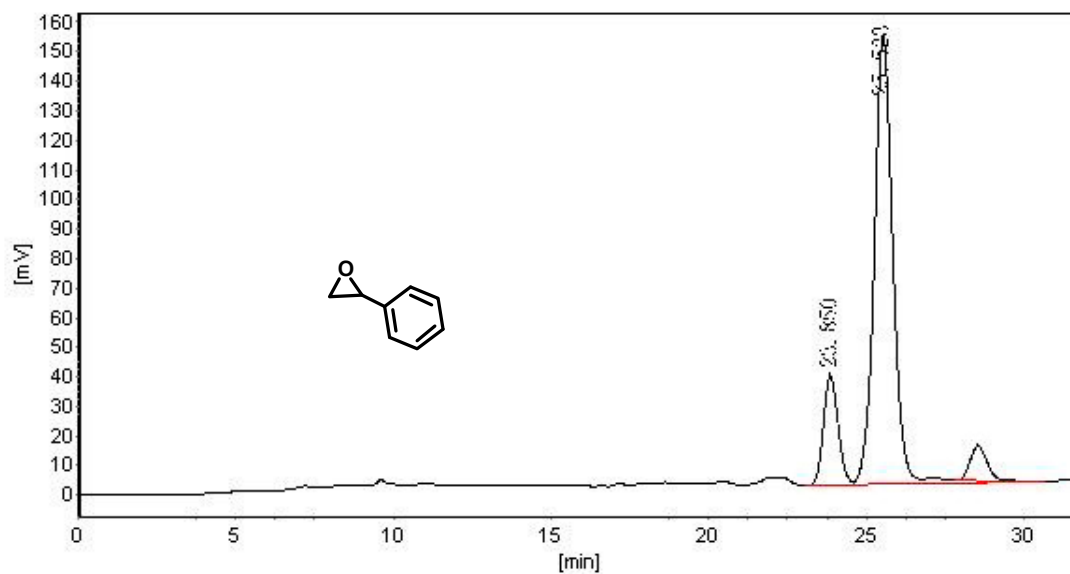

**Figure S39.** HPLC analysis for epoxystyrene (reclamation from the system).

**Table S16.** HPLC analysis for epoxystyrene (reclamation from the system).

| Peak NO. | Time   | Height | Area      | Area% |
|----------|--------|--------|-----------|-------|
| 1        | 23.850 | 36,923 | 1,203,119 | 16.05 |
| 2        | 25.523 | 15,166 | 6,291,923 | 83.95 |

## 6. HMBC Spectrum of Product 3a

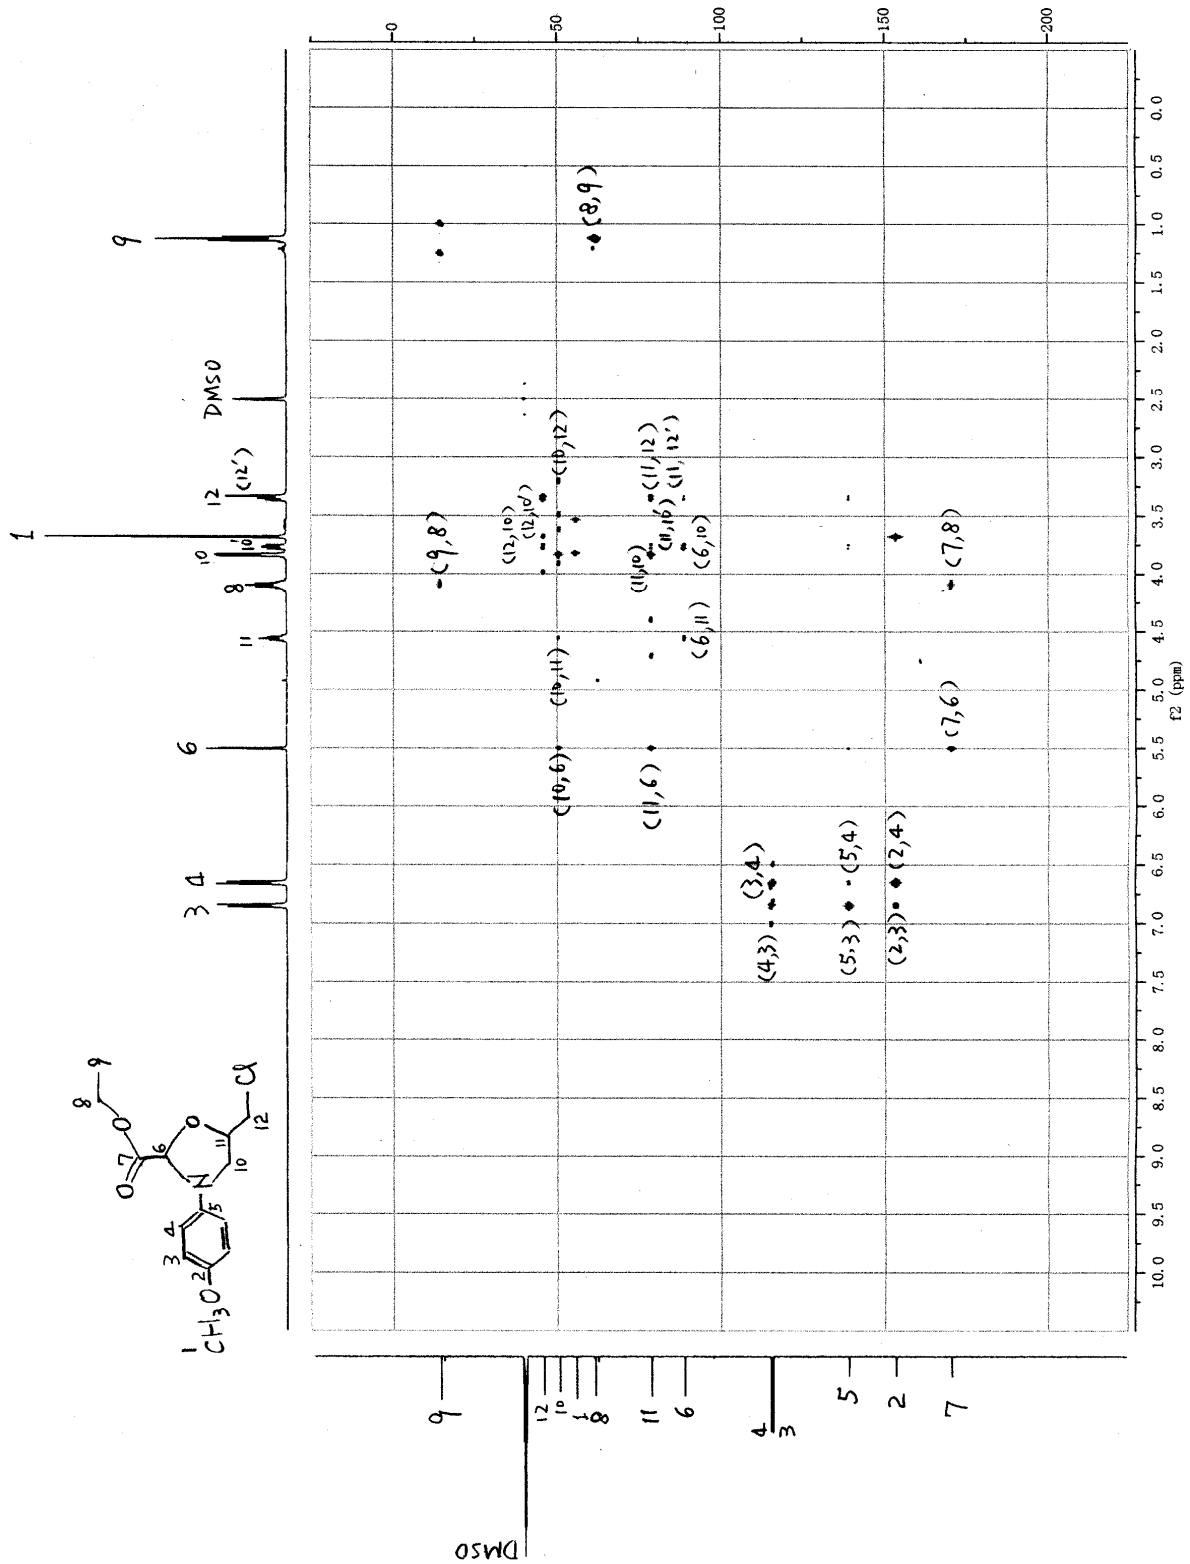

Figure S40. HMBC Spectrum of Product 3a.

## 7. NOESY Spectrum of Product 3a

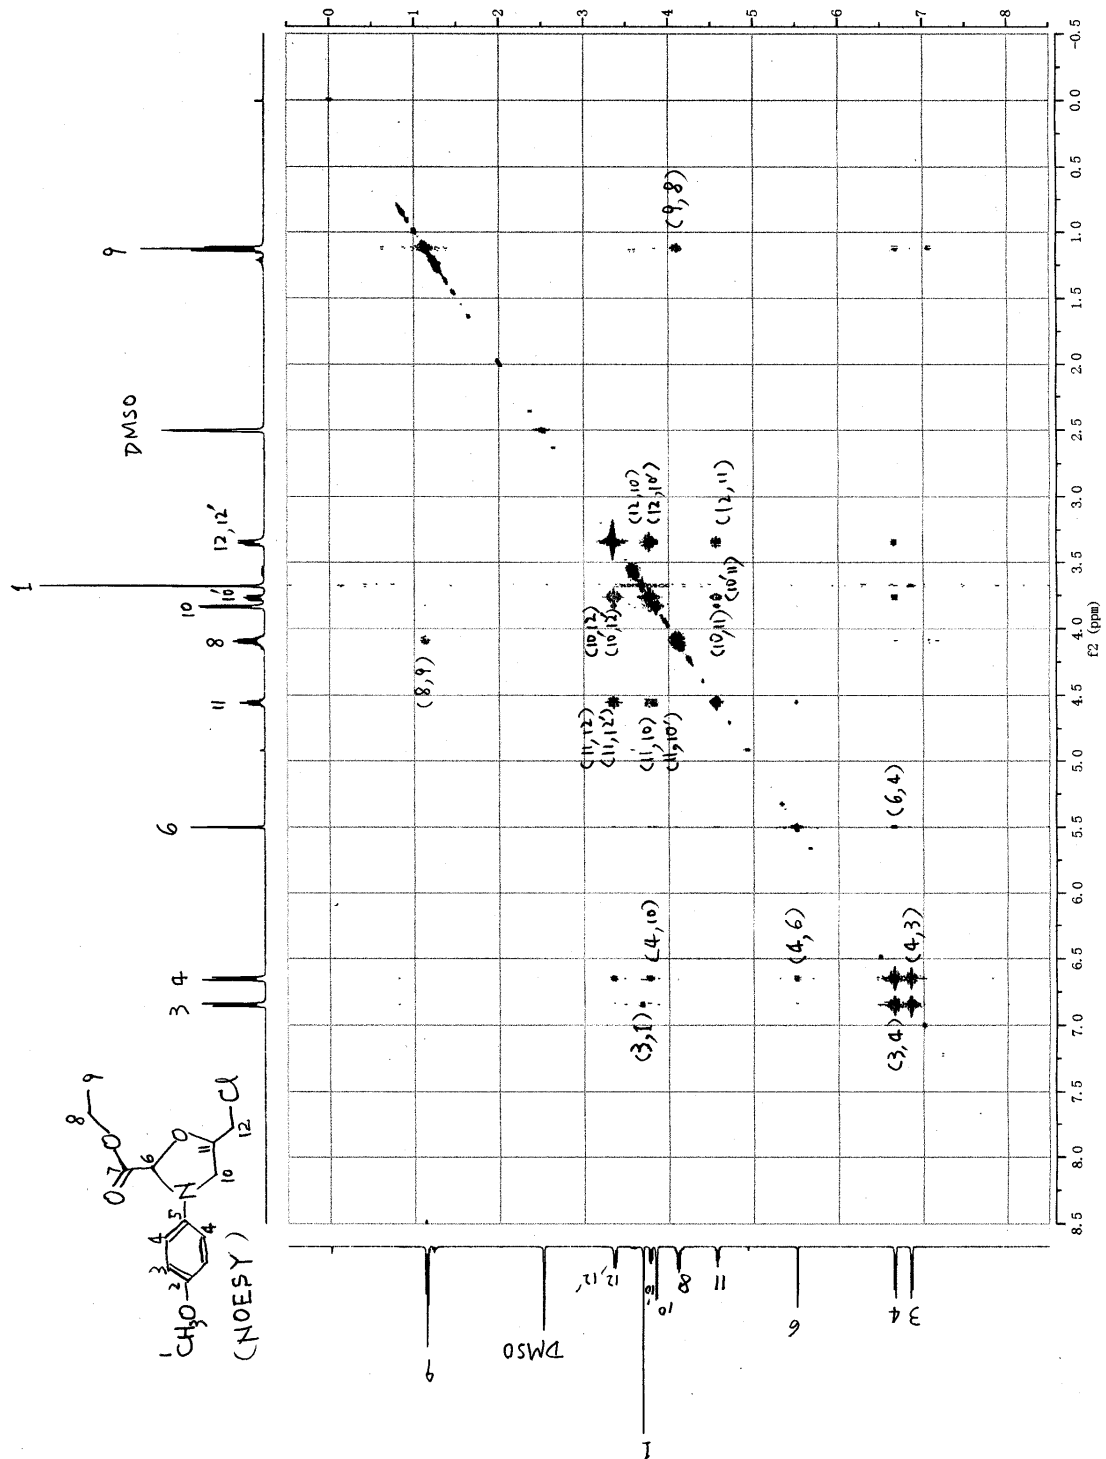

Figure S41. NOESY Spectrum of Product 3a.
